# Supplementary material for: The Methodology for Designing Residential Buildings with a Positive Energy Balance—General Approach
Source: MDPI journal article supplement (doi:10.3390/en14154715), 2021-08-03
Supplement: s1 [file s1]

**Table S5** – Questionnaire of the decision-maker's preferences – Pairwise comparison matrices for all decision-makers.

## Decision-maker group

|                  | Variant | CT      | CEN     | CEX     | CEC     | CS      | CENV    |
|------------------|---------|---------|---------|---------|---------|---------|---------|
| Variant          | 0.00    | 0.00    | 0.00    | 0.00    | 0.00    | 0.00    | 0.00    |
| CT               | 0.14159 | 0.00    | 0.00    | 0.00    | 0.00    | 0.00    | 0.00    |
| CEN              | 0.23589 | 0.00    | 0.00    | 0.00    | 0.00    | 0.00    | 0.00    |
| CEX              | 0.18417 | 0.00    | 0.00    | 0.00    | 0.00    | 0.00    | 0.00    |
| CEC              | 0.25527 | 0.00    | 0.00    | 0.00    | 0.00    | 0.00    | 0.00    |
| CS               | 0.07976 | 0.00    | 0.00    | 0.00    | 0.00    | 0.00    | 0.00    |
| CENV             | 0.10332 | 0.00    | 0.00    | 0.00    | 0.00    | 0.00    | 0.00    |
| CT A/V,i         | 0.00    | 0.18349 | 0.00    | 0.00    | 0.00    | 0.00    | 0.00    |
| CT T,BLD,i       | 0.00    | 0.12384 | 0.00    | 0.00    | 0.00    | 0.00    | 0.00    |
| CT D,IMP,i       | 0.00    | 0.12981 | 0.00    | 0.00    | 0.00    | 0.00    | 0.00    |
| CT T,LIFE,i      | 0.00    | 0.29752 | 0.00    | 0.00    | 0.00    | 0.00    | 0.00    |
| CT T,RES,i       | 0.00    | 0.26534 | 0.00    | 0.00    | 0.00    | 0.00    | 0.00    |
| CEN PE,TOTAL,i   | 0.00    | 0.00    | 0.12020 | 0.00    | 0.00    | 0.00    | 0.00    |
| CEN UE,TOTAL,i   | 0.00    | 0.00    | 0.29044 | 0.00    | 0.00    | 0.00    | 0.00    |
| CEN FE,TOTAL,i   | 0.00    | 0.00    | 0.14817 | 0.00    | 0.00    | 0.00    | 0.00    |
| CEN UE,RES,i     | 0.00    | 0.00    | 0.24137 | 0.00    | 0.00    | 0.00    | 0.00    |
| CEN FE,RES,i     | 0.00    | 0.00    | 0.19983 | 0.00    | 0.00    | 0.00    | 0.00    |
| CEX B, L,i       | 0.00    | 0.00    | 0.00    | 0.21471 | 0.00    | 0.00    | 0.00    |
| CEX B,GEN,RES, i | 0.00    | 0.00    | 0.00    | 0.15147 | 0.00    | 0.00    | 0.00    |
| CEX B,P, i*      | 0.00    | 0.00    | 0.00    | 0.09421 | 0.00    | 0.00    | 0.00    |
| CEX UTIL,RES, i  | 0.00    | 0.00    | 0.00    | 0.23019 | 0.00    | 0.00    | 0.00    |
| CEX N,ST,i       | 0.00    | 0.00    | 0.00    | 0.30942 | 0.00    | 0.00    | 0.00    |
| CEC IRR,RES,i    | 0.00    | 0.00    | 0.00    | 0.00    | 0.13842 | 0.00    | 0.00    |
| CEC TOC,i        | 0.00    | 0.00    | 0.00    | 0.00    | 0.16395 | 0.00    | 0.00    |
| CEC LCC,i        | 0.00    | 0.00    | 0.00    | 0.00    | 0.27210 | 0.00    | 0.00    |
| CEC TC,INV,i     | 0.00    | 0.00    | 0.00    | 0.00    | 0.30949 | 0.00    | 0.00    |
| CEC DGC, RES,i   | 0.00    | 0.00    | 0.00    | 0.00    | 0.11604 | 0.00    | 0.00    |
| CS TC,i          | 0.00    | 0.00    | 0.00    | 0.00    | 0.00    | 0.28196 | 0.00    |
| CS AQ,i          | 0.00    | 0.00    | 0.00    | 0.00    | 0.00    | 0.33186 | 0.00    |
| CS AC,i          | 0.00    | 0.00    | 0.00    | 0.00    | 0.00    | 0.15546 | 0.00    |
| CS VC,i          | 0.00    | 0.00    | 0.00    | 0.00    | 0.00    | 0.11350 | 0.00    |
| CS I, ENV,i      | 0.00    | 0.00    | 0.00    | 0.00    | 0.00    | 0.11723 | 0.00    |
| CENV LCA, i      | 0.00    | 0.00    | 0.00    | 0.00    | 0.00    | 0.00    | 0.24970 |
| CENV E,CO2, i    | 0.00    | 0.00    | 0.00    | 0.00    | 0.00    | 0.00    | 0.21674 |
| CENV C,RES, i    | 0.00    | 0.00    | 0.00    | 0.00    | 0.00    | 0.00    | 0.17314 |
| CENV EPBT, i     | 0.00    | 0.00    | 0.00    | 0.00    | 0.00    | 0.00    | 0.20004 |
| CENV GPBT, i     | 0.00    | 0.00    | 0.00    | 0.00    | 0.00    | 0.00    | 0.16038 |
