# Supplementary material for: The Methodology for Designing Residential Buildings with a Positive Energy Balance—General Approach
Source: MDPI journal article supplement (doi:10.3390/en14154715), 2021-08-03
Supplement: s1 [file s1]

**Table S3** – Direct-relation matrix, normalized direct-relation matrix and total-relation matrix.

# **Main criteria**

## Direct-relation matrix

|      | CT          | CEN         | CEX         | CEC         | CS          | CENV        |             |
|------|-------------|-------------|-------------|-------------|-------------|-------------|-------------|
| CT   | 0.0         | 1.01        | 1.13        | 0.00        | 0.00        | 0.00        | <b>2.14</b> |
| CEN  | 0.00        | 0.0         | 0.00        | 2.24        | 0.00        | 2.21        | <b>4.45</b> |
| CEX  | 0.00        | 0.00        | 0.0         | 1.62        | 1.40        | 1.94        | <b>4.96</b> |
| CEC  | 1.50        | 0.00        | 0.00        | 0.0         | 1.61        | 1.47        | <b>4.58</b> |
| CS   | 1.39        | 1.26        | 0.00        | 0.00        | 0.0         | 0.00        | <b>2.65</b> |
| CENV | 1.55        | 0.00        | 0.00        | 0.00        | 1.28        | 0.0         | <b>2.83</b> |
|      | <b>4.44</b> | <b>2.27</b> | <b>1.13</b> | <b>3.86</b> | <b>4.29</b> | <b>5.62</b> |             |

## Normalized direct-relation matrix

| X    | Normalized matrix |             |             |             |             |             |             |
|------|-------------------|-------------|-------------|-------------|-------------|-------------|-------------|
|      | CT                | CEN         | CEX         | CEC         | CS          | CENV        |             |
| CT   | 0,00              | 0,18        | 0,20        | 0,00        | 0,00        | 0,00        | <b>0,38</b> |
| CEN  | 0,00              | 0,00        | 0,00        | 0,40        | 0,00        | 0,39        | <b>0,79</b> |
| CEX  | 0,00              | 0,00        | 0,00        | 0,29        | 0,25        | 0,35        | <b>0,88</b> |
| CEC  | 0,27              | 0,00        | 0,00        | 0,00        | 0,29        | 0,26        | <b>0,81</b> |
| CS   | 0,25              | 0,22        | 0,00        | 0,00        | 0,00        | 0,00        | <b>0,47</b> |
| CENV | 0,28              | 0,00        | 0,00        | 0,00        | 0,23        | 0,00        | <b>0,50</b> |
|      | <b>0,79</b>       | <b>0,40</b> | <b>0,20</b> | <b>0,69</b> | <b>0,76</b> | <b>1,00</b> |             |

## Total-relation matrix

|                      | Matrix T              |      |      |      |      |      |  |
|----------------------|-----------------------|------|------|------|------|------|--|
| X(I-X) <sup>-1</sup> | Total-relation matrix |      |      |      |      |      |  |
|                      | CT                    | CEN  | CEX  | CEC  | CS   | CENV |  |
| CT                   | 0,14                  | 0,24 | 0,23 | 0,16 | 0,15 | 0,22 |  |
| CEN                  | 0,36                  | 0,13 | 0,07 | 0,47 | 0,29 | 0,59 |  |
| CEX                  | 0,38                  | 0,18 | 0,08 | 0,38 | 0,50 | 0,54 |  |
| CEC                  | 0,51                  | 0,19 | 0,10 | 0,11 | 0,43 | 0,40 |  |
| CS                   | 0,36                  | 0,31 | 0,07 | 0,15 | 0,10 | 0,19 |  |
| CENV                 | 0,40                  | 0,14 | 0,08 | 0,08 | 0,29 | 0,10 |  |

## Sub-criteria

### Direct-relation matrix

|                 | CT    | CT         |            |          | CEN        |            | CEN        | CEN        | CEN      | CEN      | CEX       |             | CEX    | CEX        | CEX    |
|-----------------|-------|------------|------------|----------|------------|------------|------------|------------|----------|----------|-----------|-------------|--------|------------|--------|
|                 | A/V,i | CT T,BLD,i | CT D,IMP,i | T,LIFE,i | CT T,RES,i | PE,TOTAL,i | UE,TOTAL,i | FE,TOTAL,i | UE,RES,i | FE,RES,i | CEX B,L,i | B,GEN,RES,i | B,P,i* | UTIL,RES,i | N,ST,i |
| CT A/V,i        | 0.00  | 2.07       | 1.97       | 0.00     | 0.00       | 1.74       | 1.92       | 1.72       | 0.00     | 0.33     | 2.25      | 0.55        | 0.96   | 0.60       | 1.41   |
| CT T,BLD,i      | 0.00  | 0.00       | 3.35       | 0.01     | 0.00       | 0.00       | 0.00       | 0.00       | 0.00     | 0.00     | 0.00      | 0.00        | 0.00   | 0.00       | 0.00   |
| CT D,IMP,i      | 0.00  | 0.00       | 0.00       | 0.00     | 0.00       | 0.00       | 0.00       | 0.00       | 0.00     | 0.00     | 0.00      | 0.00        | 0.00   | 0.00       | 0.00   |
| CT T,LIFE,i     | 0.00  | 0.00       | 0.00       | 0.00     | 0.00       | 0.00       | 0.00       | 0.00       | 0.00     | 0.00     | 0.00      | 0.00        | 0.00   | 0.00       | 0.00   |
| CT T,RES,i      | 0.00  | 0.00       | 0.00       | 0.00     | 0.00       | 0.00       | 0.00       | 0.00       | 0.02     | 0.00     | 0.00      | 0.64        | 0.00   | 0.00       | 0.00   |
| CEN PE,TOTAL,i  | 0.00  | 0.00       | 0.00       | 0.00     | 0.00       | 0.00       | 0.00       | 0.00       | 0.00     | 0.00     | 0.00      | 0.00        | 0.00   | 0.00       | 0.00   |
| CEN UE,TOTAL,i  | 0.00  | 0.00       | 0.00       | 0.00     | 0.00       | 3.96       | 0.00       | 2.40       | 0.00     | 0.40     | 0.00      | 0.00        | 0.12   | 0.00       | 0.00   |
| CEN FE,TOTAL,i  | 0.00  | 0.00       | 0.00       | 0.00     | 0.00       | 3.98       | 0.00       | 0.00       | 0.00     | 0.76     | 0.00      | 0.00        | 0.00   | 0.00       | 0.00   |
| CEN UE,RES,i    | 0.00  | 0.00       | 0.00       | 0.00     | 0.00       | 4.91       | 0.00       | 0.09       | 0.00     | 1.08     | 0.00      | 0.00        | 0.00   | 0.00       | 0.00   |
| CEN FE,RES,i    | 0.00  | 0.00       | 0.00       | 0.00     | 0.14       | 3.75       | 0.00       | 0.00       | 0.00     | 0.00     | 0.00      | 0.00        | 0.00   | 0.00       | 0.00   |
| CEX B,L,i       | 0.00  | 0.00       | 0.00       | 0.00     | 0.00       | 1.82       | 1.58       | 2.00       | 0.28     | 0.00     | 0.00      | 0.00        | 1.22   | 0.08       | 0.00   |
| CEX B,GEN,RES,i | 0.00  | 0.00       | 0.00       | 0.00     | 0.00       | 1.84       | 0.00       | 1.58       | 0.92     | 1.30     | 0.57      | 0.00        | 2.64   | 0.00       | 0.00   |
| CEX B,P,i*      | 0.00  | 0.00       | 0.00       | 0.00     | 0.00       | 1.24       | 0.00       | 0.00       | 0.00     | 0.00     | 0.00      | 0.00        | 0.00   | 0.00       | 0.00   |
| CEX UTIL,RES,i  | 0.00  | 0.00       | 0.00       | 0.00     | 0.00       | 3.45       | 0.00       | 1.68       | 0.43     | 0.76     | 0.00      | 0.63        | 1.49   | 0.00       | 0.00   |
| CEX N,ST,i      | 0.00  | 0.00       | 0.00       | 0.00     | 0.00       | 3.21       | 1.81       | 2.24       | 1.48     | 1.03     | 0.64      | 1.03        | 2.54   | 2.68       | 0.00   |
| CEC IRR,RES,i   | 0.00  | 0.00       | 0.00       | 0.00     | 0.00       | 0.00       | 0.00       | 0.00       | 0.00     | 0.00     | 0.00      | 0.00        | 0.00   | 0.00       | 0.00   |
| CEC TOC,i       | 0.00  | 0.00       | 0.00       | 0.00     | 0.00       | 0.00       | 0.00       | 0.00       | 0.00     | 0.00     | 0.00      | 0.00        | 0.00   | 0.00       | 0.00   |
| CEC LCC,i       | 0.00  | 0.00       | 0.00       | 0.00     | 0.00       | 0.00       | 0.00       | 0.00       | 0.00     | 0.00     | 0.00      | 0.00        | 0.00   | 0.00       | 0.00   |
| CEC TC,INV,i    | 0.00  | 0.00       | 0.00       | 1.54     | 0.88       | 0.00       | 0.12       | 0.19       | 0.21     | 0.31     | 0.00      | 0.25        | 0.00   | 0.00       | 0.00   |
| CEC DGC,RES,i   | 0.00  | 0.00       | 0.00       | 0.00     | 0.49       | 0.00       | 0.00       | 0.00       | 0.11     | 0.00     | 0.00      | 0.00        | 0.00   | 0.00       | 0.00   |
| CS TC,i         | 0.00  | 0.00       | 0.00       | 0.00     | 0.00       | 0.00       | 0.00       | 0.00       | 0.00     | 0.00     | 0.00      | 0.00        | 0.00   | 0.00       | 0.00   |
| CS AQ,i         | 0.00  | 0.11       | 0.00       | 0.00     | 0.00       | 0.00       | 0.00       | 0.00       | 0.00     | 0.00     | 0.00      | 0.00        | 0.00   | 0.00       | 0.00   |
| CS AC,i         | 0.00  | 0.09       | 0.00       | 0.00     | 0.00       | 0.00       | 0.00       | 0.00       | 0.00     | 0.00     | 0.00      | 0.00        | 0.00   | 0.00       | 0.00   |
| CS VC,i         | 0.00  | 0.28       | 0.00       | 0.00     | 0.00       | 0.00       | 0.00       | 0.00       | 0.00     | 0.00     | 0.00      | 0.00        | 0.00   | 0.00       | 0.00   |
| CS LENV,i       | 0.00  | 0.00       | 0.00       | 0.00     | 0.24       | 0.00       | 0.00       | 0.00       | 0.00     | 0.00     | 0.00      | 0.00        | 0.00   | 0.00       | 0.00   |
| CENV LCA,i      | 0.00  | 0.00       | 0.00       | 0.00     | 0.39       | 0.00       | 0.00       | 0.00       | 0.00     | 0.22     | 0.00      | 0.00        | 0.00   | 0.00       | 0.00   |
| CENV E,CO2,i    | 0.00  | 0.00       | 0.00       | 0.00     | 0.28       | 0.00       | 0.00       | 0.00       | 0.00     | 0.00     | 0.00      | 0.00        | 0.00   | 0.00       | 0.00   |
| CENV C,RES,i    | 0.00  | 0.00       | 0.00       | 0.00     | 0.00       | 0.30       | 0.00       | 0.00       | 0.00     | 0.00     | 0.00      | 0.24        | 0.00   | 0.44       | 0.00   |
| CENV EPBT,i     | 0.00  | 0.00       | 0.00       | 0.00     | 0.70       | 0.00       | 0.00       | 0.00       | 0.00     | 0.00     | 0.00      | 0.00        | 0.00   | 0.00       | 0.00   |
| CENV GPBT,i     | 0.00  | 0.00       | 0.00       | 0.00     | 0.45       | 0.00       | 0.00       | 0.00       | 0.00     | 0.00     | 0.00      | 0.00        | 0.00   | 0.00       | 0.00   |
|                 | 0     | 2.55       | 5.32       | 1.55     | 3.57       | 30.2       | 5.43       | 11.9       | 3.45     | 6.19     | 3.46      | 3.34        | 8.97   | 3.8        | 1.41   |

The methodology for designing residential buildings with a positive energy balance – general approach – Table S3

|                 | CEC       | CEC   | CEC   | CEC      | CEC DGC, |         |         |         |         |            | CENV  | CENV    | CENV    | CENV   | CENV   |       |
|-----------------|-----------|-------|-------|----------|----------|---------|---------|---------|---------|------------|-------|---------|---------|--------|--------|-------|
|                 | IRR,RES,i | TOC,i | LCC,i | TC,INV,i | RES,i    | CS TC,i | CS AQ,i | CS AC,i | CS VC,i | CS I,ENV,i | LCA,i | E,CO2,i | C,RES,i | EPBT,i | GPBT,i |       |
| CT A/V,i        | 0.00      | 1.82  | 1.98  | 1.43     | 0.00     | 1.17    | 0.00    | 1.27    | 1.58    | 0.00       | 1.87  | 1.04    | 0.00    | 0.00   | 0.00   | 27.68 |
| CT T,BLD,i      | 0.00      | 0.00  | 1.03  | 0.36     | 0.00     | 0.00    | 0.00    | 0.00    | 0.00    | 0.00       | 1.59  | 0.00    | 0.00    | 0.00   | 0.00   | 6.34  |
| CT D,IMP,i      | 0.00      | 0.23  | 1.12  | 1.07     | 0.50     | 0.00    | 0.00    | 0.00    | 0.00    | 0.00       | 1.27  | 0.00    | 0.00    | 0.00   | 0.00   | 4.19  |
| CT T,LIFE,i     | 0.00      | 1.18  | 1.29  | 0.00     | 0.00     | 0.00    | 0.00    | 0.00    | 0.00    | 0.83       | 1.21  | 0.00    | 0.00    | 0.00   | 0.00   | 4.51  |
| CT T,RES,i      | 0.47      | 0.14  | 0.56  | 0.00     | 0.00     | 0.00    | 0.00    | 0.00    | 0.00    | 0.00       | 0.00  | 0.00    | 0.00    | 0.00   | 0.00   | 1.83  |
| CEN PE,TOTAL,i  | 0.00      | 0.00  | 0.00  | 0.00     | 0.00     | 0.00    | 0.00    | 0.00    | 0.00    | 1.13       | 0.00  | 0.62    | 0.00    | 0.00   | 0.00   | 1.75  |
| CEN UE,TOTAL,i  | 0.77      | 1.72  | 0.41  | 0.00     | 1.16     | 0.00    | 0.00    | 0.00    | 0.00    | 0.97       | 1.84  | 1.49    | 0.00    | 0.64   | 0.00   | 15.88 |
| CEN FE,TOTAL,i  | 0.00      | 0.53  | 0.36  | 0.00     | 0.05     | 0.00    | 0.00    | 0.00    | 0.00    | 1.01       | 1.66  | 1.92    | 0.54    | 0.41   | 0.52   | 11.74 |
| CEN UE,RES,i    | 0.45      | 0.99  | 0.34  | 0.00     | 0.00     | 0.00    | 0.00    | 0.00    | 0.00    | 0.42       | 0.35  | 0.51    | 0.52    | 0.94   | 1.20   | 11.8  |
| CEN FE,RES,i    | 0.47      | 0.40  | 0.26  | 0.00     | 0.35     | 0.00    | 0.00    | 0.00    | 0.00    | 0.26       | 0.00  | 0.59    | 0.58    | 0.69   | 0.89   | 8.38  |
| CEX B,L,i       | 0.00      | 0.00  | 0.40  | 0.19     | 0.00     | 0.00    | 0.00    | 0.00    | 0.00    | 0.57       | 0.40  | 0.41    | 0.00    | 0.16   | 0.21   | 9.32  |
| CEX B,GEN,RES,i | 1.17      | 0.95  | 0.41  | 0.00     | 0.10     | 0.00    | 0.00    | 0.00    | 0.00    | 0.54       | 0.36  | 0.56    | 0.00    | 0.71   | 1.06   | 14.71 |
| CEX B,P,i*      | 0.00      | 0.00  | 0.15  | 0.16     | 0.00     | 0.00    | 0.00    | 0.00    | 0.00    | 0.99       | 0.27  | 0.77    | 0.00    | 0.32   | 0.00   | 3.9   |
| CEX UTIL,RES,i  | 1.90      | 0.01  | 0.01  | 0.65     | 0.66     | 0.00    | 0.00    | 0.00    | 0.00    | 0.29       | 0.44  | 0.57    | 0.00    | 0.77   | 0.89   | 14.63 |
| CEX N,ST,i      | 1.05      | 1.44  | 1.01  | 0.96     | 1.36     | 0.71    | 0.79    | 1.57    | 1.89    | 1.78       | 1.18  | 1.02    | 0.34    | 1.25   | 1.60   | 34.61 |
| CEC IRR,RES,i   | 0.00      | 1.00  | 0.80  | 0.62     | 1.04     | 0.00    | 0.00    | 0.00    | 0.00    | 0.00       | 0.95  | 0.00    | 0.00    | 0.31   | 0.21   | 4.93  |
| CEC TOC,i       | 0.00      | 0.00  | 1.95  | 0.00     | 0.00     | 0.00    | 0.00    | 0.00    | 0.00    | 0.00       | 0.45  | 0.16    | 0.00    | 0.00   | 0.00   | 2.56  |
| CEC LCC,i       | 0.00      | 0.00  | 0.00  | 0.00     | 0.00     | 0.00    | 0.00    | 0.00    | 0.00    | 0.00       | 0.00  | 0.00    | 0.00    | 0.00   | 0.00   | 0     |
| CEC TC,INV,i    | 0.00      | 1.36  | 2.78  | 0.00     | 0.00     | 0.00    | 0.00    | 0.00    | 0.00    | 0.00       | 0.00  | 0.00    | 0.00    | 0.00   | 0.00   | 7.64  |
| CEC DGC, RES,i  | 0.00      | 1.12  | 1.66  | 0.94     | 0.00     | 0.00    | 0.00    | 0.00    | 0.00    | 0.00       | 0.00  | 0.00    | 0.00    | 0.00   | 0.00   | 4.32  |
| CS TC,i         | 0.00      | 0.92  | 0.00  | 2.05     | 0.00     | 0.00    | 0.00    | 0.00    | 0.00    | 0.00       | 0.00  | 0.00    | 0.00    | 0.00   | 0.00   | 2.97  |
| CS AQ,i         | 0.00      | 0.76  | 0.00  | 1.84     | 0.00     | 0.37    | 0.00    | 0.00    | 0.00    | 0.05       | 0.00  | 0.00    | 0.00    | 0.00   | 0.00   | 3.13  |
| CS AC,i         | 0.00      | 0.00  | 0.00  | 1.42     | 0.00     | 0.00    | 0.00    | 0.00    | 0.00    | 0.00       | 0.00  | 0.00    | 0.00    | 0.00   | 0.00   | 1.51  |
| CS VC,i         | 0.00      | 0.00  | 0.00  | 1.37     | 0.00     | 0.00    | 0.00    | 0.00    | 0.00    | 0.00       | 0.00  | 0.00    | 0.00    | 0.00   | 0.00   | 1.65  |
| CS I,ENV,i      | 0.00      | 0.16  | 1.24  | 0.41     | 0.00     | 0.74    | 0.00    | 0.29    | 0.45    | 0.00       | 0.00  | 0.00    | 0.00    | 0.00   | 0.00   | 3.53  |
| CENV LCA,i      | 0.00      | 0.00  | 0.97  | 1.09     | 0.67     | 0.00    | 0.00    | 0.00    | 0.00    | 0.19       | 0.00  | 0.00    | 0.00    | 0.00   | 0.00   | 3.53  |
| CENV E,CO2,i    | 0.00      | 0.00  | 0.00  | 1.02     | 0.46     | 0.00    | 0.00    | 0.00    | 0.00    | 0.43       | 1.07  | 0.00    | 0.00    | 0.00   | 0.00   | 3.26  |
| CENV C,RES,i    | 0.00      | 0.25  | 0.45  | 1.29     | 0.00     | 0.00    | 0.00    | 0.00    | 0.00    | 0.34       | 1.30  | 2.32    | 0.00    | 0.96   | 1.08   | 8.97  |
| CENV EPBT,i     | 0.00      | 0.00  | 0.15  | 1.10     | 0.48     | 0.00    | 0.00    | 0.00    | 0.00    | 0.30       | 0.78  | 0.14    | 0.00    | 0.00   | 0.00   | 3.65  |
| CENV GPBT,i     | 0.00      | 0.00  | 0.00  | 0.48     | 0.44     | 0.00    | 0.00    | 0.00    | 0.00    | 0.23       | 0.40  | 0.26    | 0.00    | 0.13   | 0.00   | 2.39  |
|                 | 6.28      | 14.98 | 19.33 | 18.45    | 7.27     | 2.99    | 0.79    | 3.13    | 3.92    | 10.33      | 17.39 | 12.38   | 1.98    | 7.29   | 7.66   |       |

# Normalized direct-relation matrix

| X               | Normalized matrix |         |            |             |         |            |            |            |          |          |           |             |        |            |        |
|-----------------|-------------------|---------|------------|-------------|---------|------------|------------|------------|----------|----------|-----------|-------------|--------|------------|--------|
|                 | CT                |         | CT         |             |         | CEN        |            | CEN        |          | CEN      |           | CEN         |        | CEX        |        |
|                 | A/V,i             | T,BLD,i | CT D,IMP,i | CT T,LIFE,i | T,RES,i | PE,TOTAL,i | UE,TOTAL,i | FE,TOTAL,i | UE,RES,i | FE,RES,i | CEX B,L,i | B,GEN,RES,i | B,P,i* | UTIL,RES,i | N,ST,i |
| CT A/V,i        | 0.00              | 0.06    | 0.06       | 0.00        | 0.00    | 0.05       | 0.06       | 0.05       | 0.00     | 0.01     | 0.07      | 0.02        | 0.03   | 0.02       | 0.04   |
| CT T,BLD,i      | 0.00              | 0.00    | 0.10       | 0.00        | 0.00    | 0.00       | 0.00       | 0.00       | 0.00     | 0.00     | 0.00      | 0.00        | 0.00   | 0.00       | 0.00   |
| CT D,IMP,i      | 0.00              | 0.00    | 0.00       | 0.00        | 0.00    | 0.00       | 0.00       | 0.00       | 0.00     | 0.00     | 0.00      | 0.00        | 0.00   | 0.00       | 0.00   |
| CT T,LIFE,i     | 0.00              | 0.00    | 0.00       | 0.00        | 0.00    | 0.00       | 0.00       | 0.00       | 0.00     | 0.00     | 0.00      | 0.00        | 0.00   | 0.00       | 0.00   |
| CT T,RES,i      | 0.00              | 0.00    | 0.00       | 0.00        | 0.00    | 0.00       | 0.00       | 0.00       | 0.00     | 0.00     | 0.00      | 0.02        | 0.00   | 0.00       | 0.00   |
| CEN PE,TOTAL,i  | 0.00              | 0.00    | 0.00       | 0.00        | 0.00    | 0.00       | 0.00       | 0.00       | 0.00     | 0.00     | 0.00      | 0.00        | 0.00   | 0.00       | 0.00   |
| CEN UE,TOTAL,i  | 0.00              | 0.00    | 0.00       | 0.00        | 0.00    | 0.11       | 0.00       | 0.07       | 0.00     | 0.01     | 0.00      | 0.00        | 0.00   | 0.00       | 0.00   |
| CEN FE,TOTAL,i  | 0.00              | 0.00    | 0.00       | 0.00        | 0.00    | 0.11       | 0.00       | 0.00       | 0.00     | 0.02     | 0.00      | 0.00        | 0.00   | 0.00       | 0.00   |
| CEN UE,RES,i    | 0.00              | 0.00    | 0.00       | 0.00        | 0.00    | 0.14       | 0.00       | 0.00       | 0.00     | 0.03     | 0.00      | 0.00        | 0.00   | 0.00       | 0.00   |
| CEN FE,RES,i    | 0.00              | 0.00    | 0.00       | 0.00        | 0.00    | 0.11       | 0.00       | 0.00       | 0.00     | 0.00     | 0.00      | 0.00        | 0.00   | 0.00       | 0.00   |
| CEX B,L,i       | 0.00              | 0.00    | 0.00       | 0.00        | 0.00    | 0.05       | 0.05       | 0.06       | 0.01     | 0.00     | 0.00      | 0.00        | 0.04   | 0.00       | 0.00   |
| CEX B,GEN,RES,i | 0.00              | 0.00    | 0.00       | 0.00        | 0.00    | 0.05       | 0.00       | 0.05       | 0.03     | 0.04     | 0.02      | 0.00        | 0.08   | 0.00       | 0.00   |
| CEX B,P,i*      | 0.00              | 0.00    | 0.00       | 0.00        | 0.00    | 0.04       | 0.00       | 0.00       | 0.00     | 0.00     | 0.00      | 0.00        | 0.00   | 0.00       | 0.00   |
| CEX UTIL,RES,i  | 0.00              | 0.00    | 0.00       | 0.00        | 0.00    | 0.10       | 0.00       | 0.05       | 0.01     | 0.02     | 0.00      | 0.02        | 0.04   | 0.00       | 0.00   |
| CEX N,ST,i      | 0.00              | 0.00    | 0.00       | 0.00        | 0.00    | 0.09       | 0.05       | 0.06       | 0.04     | 0.03     | 0.02      | 0.03        | 0.07   | 0.08       | 0.00   |
| CEC IRR,RES,i   | 0.00              | 0.00    | 0.00       | 0.00        | 0.00    | 0.00       | 0.00       | 0.00       | 0.00     | 0.00     | 0.00      | 0.00        | 0.00   | 0.00       | 0.00   |
| CEC TOC,i       | 0.00              | 0.00    | 0.00       | 0.00        | 0.00    | 0.00       | 0.00       | 0.00       | 0.00     | 0.00     | 0.00      | 0.00        | 0.00   | 0.00       | 0.00   |
| CEC LCC,i       | 0.00              | 0.00    | 0.00       | 0.00        | 0.00    | 0.00       | 0.00       | 0.00       | 0.00     | 0.00     | 0.00      | 0.00        | 0.00   | 0.00       | 0.00   |
| CEC TC,INV,i    | 0.00              | 0.00    | 0.00       | 0.04        | 0.03    | 0.00       | 0.00       | 0.01       | 0.01     | 0.01     | 0.00      | 0.01        | 0.00   | 0.00       | 0.00   |
| CEC DGC, RES,i  | 0.00              | 0.00    | 0.00       | 0.00        | 0.01    | 0.00       | 0.00       | 0.00       | 0.00     | 0.00     | 0.00      | 0.00        | 0.00   | 0.00       | 0.00   |
| CS TC,i         | 0.00              | 0.00    | 0.00       | 0.00        | 0.00    | 0.00       | 0.00       | 0.00       | 0.00     | 0.00     | 0.00      | 0.00        | 0.00   | 0.00       | 0.00   |
| CS AQ,i         | 0.00              | 0.00    | 0.00       | 0.00        | 0.00    | 0.00       | 0.00       | 0.00       | 0.00     | 0.00     | 0.00      | 0.00        | 0.00   | 0.00       | 0.00   |
| CS AC,i         | 0.00              | 0.00    | 0.00       | 0.00        | 0.00    | 0.00       | 0.00       | 0.00       | 0.00     | 0.00     | 0.00      | 0.00        | 0.00   | 0.00       | 0.00   |
| CS VC,i         | 0.00              | 0.01    | 0.00       | 0.00        | 0.00    | 0.00       | 0.00       | 0.00       | 0.00     | 0.00     | 0.00      | 0.00        | 0.00   | 0.00       | 0.00   |
| CS L,ENV,i      | 0.00              | 0.00    | 0.00       | 0.00        | 0.01    | 0.00       | 0.00       | 0.00       | 0.00     | 0.00     | 0.00      | 0.00        | 0.00   | 0.00       | 0.00   |
| CENV LCA, i     | 0.00              | 0.00    | 0.00       | 0.00        | 0.01    | 0.00       | 0.00       | 0.00       | 0.00     | 0.01     | 0.00      | 0.00        | 0.00   | 0.00       | 0.00   |
| CENV E,CO2, i   | 0.00              | 0.00    | 0.00       | 0.00        | 0.01    | 0.00       | 0.00       | 0.00       | 0.00     | 0.00     | 0.00      | 0.00        | 0.00   | 0.00       | 0.00   |
| CENV C,RES, i   | 0.00              | 0.00    | 0.00       | 0.00        | 0.00    | 0.01       | 0.00       | 0.00       | 0.00     | 0.00     | 0.00      | 0.01        | 0.00   | 0.01       | 0.00   |
| CENV EPBT, i    | 0.00              | 0.00    | 0.00       | 0.00        | 0.02    | 0.00       | 0.00       | 0.00       | 0.00     | 0.00     | 0.00      | 0.00        | 0.00   | 0.00       | 0.00   |
| CENV GPBT, i    | 0.00              | 0.00    | 0.00       | 0.00        | 0.01    | 0.00       | 0.00       | 0.00       | 0.00     | 0.00     | 0.00      | 0.00        | 0.00   | 0.00       | 0.00   |

X

Normalized matrix

The methodology for designing residential buildings with a positive energy balance – general approach – Table S3

|                  | CEC           |       | CEC   | CEC      | CS             |         |      |         |         | CS I, | CENV   | CENV    | CENV     | CENV    | CENV    |
|------------------|---------------|-------|-------|----------|----------------|---------|------|---------|---------|-------|--------|---------|----------|---------|---------|
|                  | CEC IRR,RES,i | TOC,i | LCC,i | TC,INV,i | CEC DGC, RES,i | CS TC,i | AQ,i | CS AC,i | CS VC,i | ENV,i | LCA, i | E,CO2,i | C,RES, i | EPBT, i | GPBT, i |
| CT A/V,i         | 0.00          | 0.05  | 0.06  | 0.04     | 0.00           | 0.03    | 0.00 | 0.04    | 0.05    | 0.00  | 0.05   | 0.03    | 0.00     | 0.00    | 0.00    |
| CT T,BLD,i       | 0.00          | 0.00  | 0.03  | 0.01     | 0.00           | 0.00    | 0.00 | 0.00    | 0.00    | 0.00  | 0.05   | 0.00    | 0.00     | 0.00    | 0.00    |
| CT D,IMP,i       | 0.00          | 0.01  | 0.03  | 0.03     | 0.01           | 0.00    | 0.00 | 0.00    | 0.00    | 0.00  | 0.04   | 0.00    | 0.00     | 0.00    | 0.00    |
| CT T,LIFE,i      | 0.00          | 0.03  | 0.04  | 0.00     | 0.00           | 0.00    | 0.00 | 0.00    | 0.00    | 0.02  | 0.03   | 0.00    | 0.00     | 0.00    | 0.00    |
| CT T,RES,i       | 0.01          | 0.00  | 0.02  | 0.00     | 0.00           | 0.00    | 0.00 | 0.00    | 0.00    | 0.00  | 0.00   | 0.00    | 0.00     | 0.00    | 0.00    |
| CEN PE,TOTAL,i   | 0.00          | 0.00  | 0.00  | 0.00     | 0.00           | 0.00    | 0.00 | 0.00    | 0.00    | 0.03  | 0.00   | 0.02    | 0.00     | 0.00    | 0.00    |
| CEN UE,TOTAL,i   | 0.02          | 0.05  | 0.01  | 0.00     | 0.03           | 0.00    | 0.00 | 0.00    | 0.00    | 0.03  | 0.05   | 0.04    | 0.00     | 0.02    | 0.00    |
| CEN FE,TOTAL,i   | 0.00          | 0.02  | 0.01  | 0.00     | 0.00           | 0.00    | 0.00 | 0.00    | 0.00    | 0.03  | 0.05   | 0.06    | 0.02     | 0.01    | 0.02    |
| CEN UE,RES,i     | 0.01          | 0.03  | 0.01  | 0.00     | 0.00           | 0.00    | 0.00 | 0.00    | 0.00    | 0.01  | 0.01   | 0.01    | 0.02     | 0.03    | 0.03    |
| CEN FE,RES,i     | 0.01          | 0.01  | 0.01  | 0.00     | 0.01           | 0.00    | 0.00 | 0.00    | 0.00    | 0.01  | 0.00   | 0.02    | 0.02     | 0.02    | 0.03    |
| CEX B,L,i        | 0.00          | 0.00  | 0.01  | 0.01     | 0.00           | 0.00    | 0.00 | 0.00    | 0.00    | 0.02  | 0.01   | 0.01    | 0.00     | 0.00    | 0.01    |
| CEX B,GEN,RES, i | 0.03          | 0.03  | 0.01  | 0.00     | 0.00           | 0.00    | 0.00 | 0.00    | 0.00    | 0.02  | 0.01   | 0.02    | 0.00     | 0.02    | 0.03    |
| CEX B,P, i*      | 0.00          | 0.00  | 0.00  | 0.00     | 0.00           | 0.00    | 0.00 | 0.00    | 0.00    | 0.03  | 0.01   | 0.02    | 0.00     | 0.01    | 0.00    |
| CEX UTIL,RES, i  | 0.05          | 0.00  | 0.00  | 0.02     | 0.02           | 0.00    | 0.00 | 0.00    | 0.00    | 0.01  | 0.01   | 0.02    | 0.00     | 0.02    | 0.03    |
| CEX N,ST,i       | 0.03          | 0.04  | 0.03  | 0.03     | 0.04           | 0.02    | 0.02 | 0.05    | 0.05    | 0.05  | 0.03   | 0.03    | 0.01     | 0.04    | 0.05    |
| CEC IRR,RES,i    | 0.00          | 0.03  | 0.02  | 0.02     | 0.03           | 0.00    | 0.00 | 0.00    | 0.00    | 0.00  | 0.03   | 0.00    | 0.00     | 0.01    | 0.01    |
| CEC TOC,i        | 0.00          | 0.00  | 0.06  | 0.00     | 0.00           | 0.00    | 0.00 | 0.00    | 0.00    | 0.00  | 0.01   | 0.00    | 0.00     | 0.00    | 0.00    |
| CEC LCC,i        | 0.00          | 0.00  | 0.00  | 0.00     | 0.00           | 0.00    | 0.00 | 0.00    | 0.00    | 0.00  | 0.00   | 0.00    | 0.00     | 0.00    | 0.00    |
| CEC TC,INV,i     | 0.00          | 0.04  | 0.08  | 0.00     | 0.00           | 0.00    | 0.00 | 0.00    | 0.00    | 0.00  | 0.00   | 0.00    | 0.00     | 0.00    | 0.00    |
| CEC DGC, RES,i   | 0.00          | 0.03  | 0.05  | 0.03     | 0.00           | 0.00    | 0.00 | 0.00    | 0.00    | 0.00  | 0.00   | 0.00    | 0.00     | 0.00    | 0.00    |
| CS TC,i          | 0.00          | 0.03  | 0.00  | 0.06     | 0.00           | 0.00    | 0.00 | 0.00    | 0.00    | 0.00  | 0.00   | 0.00    | 0.00     | 0.00    | 0.00    |
| CS AQ,i          | 0.00          | 0.02  | 0.00  | 0.05     | 0.00           | 0.01    | 0.00 | 0.00    | 0.00    | 0.00  | 0.00   | 0.00    | 0.00     | 0.00    | 0.00    |
| CS AC,i          | 0.00          | 0.00  | 0.00  | 0.04     | 0.00           | 0.00    | 0.00 | 0.00    | 0.00    | 0.00  | 0.00   | 0.00    | 0.00     | 0.00    | 0.00    |
| CS VC,i          | 0.00          | 0.00  | 0.00  | 0.04     | 0.00           | 0.00    | 0.00 | 0.00    | 0.00    | 0.00  | 0.00   | 0.00    | 0.00     | 0.00    | 0.00    |
| CS I,ENV,i       | 0.00          | 0.00  | 0.04  | 0.01     | 0.00           | 0.02    | 0.00 | 0.01    | 0.01    | 0.00  | 0.00   | 0.00    | 0.00     | 0.00    | 0.00    |
| CENV LCA, i      | 0.00          | 0.00  | 0.03  | 0.03     | 0.02           | 0.00    | 0.00 | 0.00    | 0.00    | 0.01  | 0.00   | 0.00    | 0.00     | 0.00    | 0.00    |
| CENV E,CO2, i    | 0.00          | 0.00  | 0.00  | 0.03     | 0.01           | 0.00    | 0.00 | 0.00    | 0.00    | 0.01  | 0.03   | 0.00    | 0.00     | 0.00    | 0.00    |
| CENV C,RES, i    | 0.00          | 0.01  | 0.01  | 0.04     | 0.00           | 0.00    | 0.00 | 0.00    | 0.00    | 0.01  | 0.04   | 0.07    | 0.00     | 0.03    | 0.03    |
| CENV EPBT, i     | 0.00          | 0.00  | 0.00  | 0.03     | 0.01           | 0.00    | 0.00 | 0.00    | 0.00    | 0.01  | 0.02   | 0.00    | 0.00     | 0.00    | 0.00    |
| CENV GPBT, i     | 0.00          | 0.00  | 0.00  | 0.01     | 0.01           | 0.00    | 0.00 | 0.00    | 0.00    | 0.01  | 0.01   | 0.01    | 0.00     | 0.00    | 0.00    |

## Total-relation matrix

| X(I-X) <sup>-1</sup> | Matrix T<br>Total-relation matrix |         |            |             |         |            |            |            |          |          |           |             |        |            |        |
|----------------------|-----------------------------------|---------|------------|-------------|---------|------------|------------|------------|----------|----------|-----------|-------------|--------|------------|--------|
|                      | CT                                | CT      | CT         | CT          | CEN     | CEN        | CEN        | CEN        | CEN      | CEN      | CEX       | CEX         | CEX    | CEX        | CEX    |
| CT A/V,i             | A/V,i                             | T,BLD,i | CT D,IMP,i | CT T,LIFE,i | T,RES,i | PE,TOTAL,i | UE,TOTAL,i | FE,TOTAL,i | UE,RES,i | FE,RES,i | CEX B,L,i | B,GEN,RES,i | B,P,i* | UTIL,RES,i | N,ST,i |
| CT T,BLD,i           | 0,00                              | 0,06    | 0,06       | 0,00        | 0,00    | 0,08       | 0,06       | 0,06       | 0,00     | 0,02     | 0,07      | 0,02        | 0,04   | 0,02       | 0,04   |
| CT D,IMP,i           | 0,00                              | 0,00    | 0,10       | 0,00        | 0,00    | 0,00       | 0,00       | 0,00       | 0,00     | 0,00     | 0,00      | 0,00        | 0,00   | 0,00       | 0,00   |
| CT T,LIFE,i          | 0,00                              | 0,00    | 0,00       | 0,00        | 0,00    | 0,00       | 0,00       | 0,00       | 0,00     | 0,00     | 0,00      | 0,00        | 0,00   | 0,00       | 0,00   |
| CT T,RES,i           | 0,00                              | 0,00    | 0,00       | 0,00        | 0,00    | 0,00       | 0,00       | 0,00       | 0,00     | 0,00     | 0,00      | 0,00        | 0,00   | 0,00       | 0,00   |
| CEN PE,TOTAL,i       | 0,00                              | 0,00    | 0,00       | 0,00        | 0,00    | 0,00       | 0,00       | 0,00       | 0,00     | 0,00     | 0,00      | 0,02        | 0,00   | 0,00       | 0,00   |
| CEN UE,TOTAL,i       | 0,00                              | 0,00    | 0,00       | 0,00        | 0,00    | 0,00       | 0,00       | 0,00       | 0,00     | 0,00     | 0,00      | 0,00        | 0,00   | 0,00       | 0,00   |
| CEN FE,TOTAL,i       | 0,00                              | 0,00    | 0,00       | 0,00        | 0,00    | 0,12       | 0,00       | 0,07       | 0,00     | 0,01     | 0,00      | 0,00        | 0,00   | 0,00       | 0,00   |
| CEN UE,RES,i         | 0,00                              | 0,00    | 0,00       | 0,00        | 0,00    | 0,12       | 0,00       | 0,00       | 0,02     | 0,00     | 0,00      | 0,00        | 0,00   | 0,00       | 0,00   |
| CEN FE,RES,i         | 0,00                              | 0,00    | 0,00       | 0,00        | 0,00    | 0,15       | 0,00       | 0,00       | 0,03     | 0,00     | 0,00      | 0,00        | 0,00   | 0,00       | 0,00   |
| CEX B,L,i            | 0,00                              | 0,00    | 0,00       | 0,00        | 0,01    | 0,11       | 0,00       | 0,00       | 0,00     | 0,00     | 0,00      | 0,00        | 0,00   | 0,00       | 0,00   |
| CEX B,GEN,RES,i      | 0,00                              | 0,00    | 0,00       | 0,00        | 0,00    | 0,07       | 0,05       | 0,06       | 0,01     | 0,00     | 0,00      | 0,00        | 0,04   | 0,00       | 0,00   |
| CEX B,P,i*           | 0,00                              | 0,00    | 0,00       | 0,00        | 0,00    | 0,07       | 0,00       | 0,05       | 0,03     | 0,04     | 0,02      | 0,00        | 0,08   | 0,00       | 0,00   |
| CEX UTIL,RES,i       | 0,00                              | 0,00    | 0,00       | 0,00        | 0,00    | 0,04       | 0,00       | 0,00       | 0,00     | 0,00     | 0,00      | 0,00        | 0,00   | 0,00       | 0,00   |
| CEX N,ST,i           | 0,00                              | 0,00    | 0,00       | 0,00        | 0,00    | 0,11       | 0,00       | 0,05       | 0,01     | 0,02     | 0,00      | 0,02        | 0,04   | 0,00       | 0,00   |
| CEC IRR,RES,i        | 0,00                              | 0,00    | 0,00       | 0,00        | 0,00    | 0,13       | 0,05       | 0,08       | 0,05     | 0,04     | 0,02      | 0,03        | 0,08   | 0,08       | 0,00   |
| CEC TOC,i            | 0,00                              | 0,00    | 0,00       | 0,00        | 0,00    | 0,00       | 0,00       | 0,00       | 0,00     | 0,00     | 0,00      | 0,00        | 0,00   | 0,00       | 0,00   |
| CEC LCC,i            | 0,00                              | 0,00    | 0,00       | 0,00        | 0,00    | 0,00       | 0,00       | 0,00       | 0,00     | 0,00     | 0,00      | 0,00        | 0,00   | 0,00       | 0,00   |
| CEC TC,INV,i         | 0,00                              | 0,00    | 0,00       | 0,00        | 0,00    | 0,00       | 0,00       | 0,00       | 0,00     | 0,00     | 0,00      | 0,00        | 0,00   | 0,00       | 0,00   |
| CEC DGC, RES,i       | 0,00                              | 0,00    | 0,00       | 0,04        | 0,03    | 0,00       | 0,00       | 0,01       | 0,01     | 0,01     | 0,00      | 0,01        | 0,00   | 0,00       | 0,00   |
| CS TC,i              | 0,00                              | 0,00    | 0,00       | 0,00        | 0,01    | 0,00       | 0,00       | 0,00       | 0,00     | 0,00     | 0,00      | 0,00        | 0,00   | 0,00       | 0,00   |
| CS AQ,i              | 0,00                              | 0,00    | 0,00       | 0,00        | 0,00    | 0,00       | 0,00       | 0,00       | 0,00     | 0,00     | 0,00      | 0,00        | 0,00   | 0,00       | 0,00   |
| CS AC,i              | 0,00                              | 0,00    | 0,00       | 0,00        | 0,00    | 0,00       | 0,00       | 0,00       | 0,00     | 0,00     | 0,00      | 0,00        | 0,00   | 0,00       | 0,00   |
| CS VC,i              | 0,00                              | 0,00    | 0,00       | 0,00        | 0,00    | 0,00       | 0,00       | 0,00       | 0,00     | 0,00     | 0,00      | 0,00        | 0,00   | 0,00       | 0,00   |
| CS LENV,i            | 0,00                              | 0,01    | 0,00       | 0,00        | 0,00    | 0,00       | 0,00       | 0,00       | 0,00     | 0,00     | 0,00      | 0,00        | 0,00   | 0,00       | 0,00   |
| CENV LCA,i           | 0,00                              | 0,00    | 0,00       | 0,00        | 0,01    | 0,00       | 0,00       | 0,00       | 0,00     | 0,00     | 0,00      | 0,00        | 0,00   | 0,00       | 0,00   |
| CENV E,CO2,i         | 0,00                              | 0,00    | 0,00       | 0,00        | 0,01    | 0,00       | 0,00       | 0,00       | 0,00     | 0,01     | 0,00      | 0,00        | 0,00   | 0,00       | 0,00   |
| CENV C,RES,i         | 0,00                              | 0,00    | 0,00       | 0,00        | 0,01    | 0,00       | 0,00       | 0,00       | 0,00     | 0,00     | 0,00      | 0,00        | 0,00   | 0,00       | 0,00   |
| CENV EPBT,i          | 0,00                              | 0,00    | 0,00       | 0,00        | 0,00    | 0,01       | 0,00       | 0,00       | 0,00     | 0,00     | 0,00      | 0,01        | 0,00   | 0,01       | 0,00   |
| CENV GPBT,i          | 0,00                              | 0,00    | 0,00       | 0,00        | 0,02    | 0,00       | 0,00       | 0,00       | 0,00     | 0,00     | 0,00      | 0,00        | 0,00   | 0,00       | 0,00   |
| CT A/V,i             | 0,00                              | 0,00    | 0,00       | 0,00        | 0,01    | 0,00       | 0,00       | 0,00       | 0,00     | 0,00     | 0,00      | 0,00        | 0,00   | 0,00       | 0,00   |

| X(I-X) <sup>-1</sup> | Matrix T<br>Total-relation matrix |       |       |          |                |         |       |         |         |       |       |         |         |        |        |
|----------------------|-----------------------------------|-------|-------|----------|----------------|---------|-------|---------|---------|-------|-------|---------|---------|--------|--------|
|                      | CEC                               |       |       | CS       |                |         | CS I, |         |         | CENV  |       |         | CENV    |        |        |
|                      | CEC IRR,RES,i                     | TOC,i | LCC,i | TC,INV,i | CEC DGC, RES,i | CS TC,i | AQ,i  | CS AC,i | CS VC,i | ENV,i | LCA,i | E,CO2,i | C,RES,i | EPBT,i | GPBT,i |
|                      | CEC IRR,RES,i                     | TOC,i | LCC,i | TC,INV,i | CEC DGC, RES,i | CS TC,i | AQ,i  | CS AC,i | CS VC,i | ENV,i | LCA,i | E,CO2,i | C,RES,i | EPBT,i | GPBT,i |
| CT A/V,i             | 0.00                              | 0.06  | 0.08  | 0.06     | 0.01           | 0.03    | 0.00  | 0.04    | 0.05    | 0.01  | 0.07  | 0.04    | 0.00    | 0.01   | 0.00   |
| CT T,BLD,i           | 0.00                              | 0.00  | 0.04  | 0.02     | 0.00           | 0.00    | 0.00  | 0.00    | 0.00    | 0.00  | 0.05  | 0.00    | 0.00    | 0.00   | 0.00   |
| CT D,IMP,i           | 0.00                              | 0.01  | 0.04  | 0.03     | 0.02           | 0.00    | 0.00  | 0.00    | 0.00    | 0.00  | 0.04  | 0.00    | 0.00    | 0.00   | 0.00   |
| CT T,LIFE,i          | 0.00                              | 0.03  | 0.04  | 0.00     | 0.00           | 0.00    | 0.00  | 0.00    | 0.00    | 0.02  | 0.04  | 0.00    | 0.00    | 0.00   | 0.00   |
| CT T,RES,i           | 0.01                              | 0.01  | 0.02  | 0.00     | 0.00           | 0.00    | 0.00  | 0.00    | 0.00    | 0.00  | 0.00  | 0.00    | 0.00    | 0.00   | 0.00   |
| CENV PE,TOTAL,i      | 0.00                              | 0.00  | 0.00  | 0.00     | 0.00           | 0.00    | 0.00  | 0.00    | 0.00    | 0.03  | 0.00  | 0.02    | 0.00    | 0.00   | 0.00   |
| CENV UE,TOTAL,i      | 0.02                              | 0.05  | 0.02  | 0.01     | 0.04           | 0.00    | 0.00  | 0.00    | 0.00    | 0.04  | 0.06  | 0.05    | 0.00    | 0.02   | 0.00   |
| CENV FE,TOTAL,i      | 0.00                              | 0.02  | 0.02  | 0.01     | 0.00           | 0.00    | 0.00  | 0.00    | 0.00    | 0.03  | 0.05  | 0.06    | 0.02    | 0.01   | 0.02   |
| CENV UE,RES,i        | 0.01                              | 0.03  | 0.01  | 0.00     | 0.00           | 0.00    | 0.00  | 0.00    | 0.00    | 0.02  | 0.01  | 0.02    | 0.02    | 0.03   | 0.04   |
| CENV FE,RES,i        | 0.01                              | 0.01  | 0.01  | 0.00     | 0.01           | 0.00    | 0.00  | 0.00    | 0.00    | 0.01  | 0.00  | 0.02    | 0.02    | 0.02   | 0.03   |
| CEX B,L,i            | 0.00                              | 0.00  | 0.02  | 0.01     | 0.00           | 0.00    | 0.00  | 0.00    | 0.00    | 0.02  | 0.02  | 0.02    | 0.00    | 0.01   | 0.01   |
| CEX B,GEN,RES, i     | 0.03                              | 0.03  | 0.02  | 0.00     | 0.01           | 0.00    | 0.00  | 0.00    | 0.00    | 0.02  | 0.02  | 0.02    | 0.00    | 0.02   | 0.03   |
| CEX B,P,i*           | 0.00                              | 0.00  | 0.01  | 0.01     | 0.00           | 0.00    | 0.00  | 0.00    | 0.00    | 0.03  | 0.01  | 0.02    | 0.00    | 0.01   | 0.00   |
| CEX UTIL,RES, i      | 0.06                              | 0.01  | 0.01  | 0.02     | 0.02           | 0.00    | 0.00  | 0.00    | 0.00    | 0.02  | 0.02  | 0.02    | 0.00    | 0.03   | 0.03   |
| CEX N,ST,i           | 0.04                              | 0.05  | 0.05  | 0.04     | 0.05           | 0.02    | 0.02  | 0.05    | 0.06    | 0.07  | 0.05  | 0.05    | 0.01    | 0.04   | 0.05   |
| CEC IRR,RES,i        | 0.00                              | 0.03  | 0.03  | 0.02     | 0.03           | 0.00    | 0.00  | 0.00    | 0.00    | 0.00  | 0.03  | 0.00    | 0.00    | 0.01   | 0.01   |
| CEC TOC,i            | 0.00                              | 0.00  | 0.06  | 0.00     | 0.00           | 0.00    | 0.00  | 0.00    | 0.00    | 0.00  | 0.01  | 0.00    | 0.00    | 0.00   | 0.00   |
| CEC LCC,i            | 0.00                              | 0.00  | 0.00  | 0.00     | 0.00           | 0.00    | 0.00  | 0.00    | 0.00    | 0.00  | 0.00  | 0.00    | 0.00    | 0.00   | 0.00   |
| CEC TC,INV,i         | 0.00                              | 0.04  | 0.09  | 0.00     | 0.00           | 0.00    | 0.00  | 0.00    | 0.00    | 0.00  | 0.00  | 0.00    | 0.00    | 0.00   | 0.00   |
| CEC DGC, RES,i       | 0.00                              | 0.03  | 0.05  | 0.03     | 0.00           | 0.00    | 0.00  | 0.00    | 0.00    | 0.00  | 0.00  | 0.00    | 0.00    | 0.00   | 0.00   |
| CS TC,i              | 0.00                              | 0.03  | 0.01  | 0.06     | 0.00           | 0.00    | 0.00  | 0.00    | 0.00    | 0.00  | 0.00  | 0.00    | 0.00    | 0.00   | 0.00   |
| CS AQ,i              | 0.00                              | 0.02  | 0.01  | 0.05     | 0.00           | 0.01    | 0.00  | 0.00    | 0.00    | 0.00  | 0.00  | 0.00    | 0.00    | 0.00   | 0.00   |
| CS AC,i              | 0.00                              | 0.00  | 0.00  | 0.04     | 0.00           | 0.00    | 0.00  | 0.00    | 0.00    | 0.00  | 0.00  | 0.00    | 0.00    | 0.00   | 0.00   |
| CS VC,i              | 0.00                              | 0.00  | 0.00  | 0.04     | 0.00           | 0.00    | 0.00  | 0.00    | 0.00    | 0.00  | 0.00  | 0.00    | 0.00    | 0.00   | 0.00   |
| CS I,ENV,i           | 0.00                              | 0.01  | 0.04  | 0.01     | 0.00           | 0.02    | 0.00  | 0.01    | 0.01    | 0.00  | 0.00  | 0.00    | 0.00    | 0.00   | 0.00   |
| CENV LCA, i          | 0.00                              | 0.00  | 0.03  | 0.03     | 0.02           | 0.00    | 0.00  | 0.00    | 0.00    | 0.01  | 0.00  | 0.00    | 0.00    | 0.00   | 0.00   |
| CENV E,CO2, i        | 0.00                              | 0.00  | 0.00  | 0.03     | 0.01           | 0.00    | 0.00  | 0.00    | 0.00    | 0.01  | 0.03  | 0.00    | 0.00    | 0.00   | 0.00   |
| CENV C,RES, i        | 0.00                              | 0.01  | 0.02  | 0.04     | 0.00           | 0.00    | 0.00  | 0.00    | 0.00    | 0.01  | 0.04  | 0.07    | 0.00    | 0.03   | 0.03   |
| CENV EPBT, i         | 0.00                              | 0.00  | 0.01  | 0.03     | 0.01           | 0.00    | 0.00  | 0.00    | 0.00    | 0.01  | 0.02  | 0.00    | 0.00    | 0.00   | 0.00   |
| CENV GPBT, i         | 0.00                              | 0.00  | 0.00  | 0.02     | 0.01           | 0.00    | 0.00  | 0.00    | 0.00    | 0.01  | 0.01  | 0.01    | 0.00    | 0.00   | 0.00   |
