# Supplementary material for: The Methodology for Designing Residential Buildings with a Positive Energy Balance—General Approach
Source: MDPI journal article supplement (doi:10.3390/en14154715), 2021-08-03
Supplement: s1 [file s1]

**Table S4** – Distribution of the frequency of evaluation marks given by the decision-makers.

## Designer/Architect group

| Question no. | Frequency of the indicated value |      |      |      |    |    |   |   |   | Geometric mean | Median | Modal value | Consistency index |
|--------------|----------------------------------|------|------|------|----|----|---|---|---|----------------|--------|-------------|-------------------|
| [-]          | -9                               | -7   | -5   | -3   | 1  | 3  | 5 | 7 | 9 | [-]            | [-]    | [-]         | [-]               |
| [-]          | 0.11                             | 0.14 | 0.20 | 0.33 | 1  | 3  | 5 | 7 | 9 | [-]            | [-]    | [-]         | [-]               |
| 1.1          | 0                                | 0    | 0    | 0    | 9  | 0  | 0 | 0 | 0 | 1.00           | 1.00   | 1.00        |                   |
| 1.2          | 0                                | 0    | 0    | 0    | 2  | 0  | 0 | 0 | 0 | 1.00           | 1.00   | 1.00        |                   |
| 1.3          | 0                                | 0    | 0    | 0    | 9  | 0  | 0 | 0 | 0 | 1.00           | 1.00   | 1.00        |                   |
| 1.4          | 0                                | 0    | 0    | 0    | 3  | 0  | 0 | 0 | 0 | 1.00           | 1.00   | 1.00        |                   |
| 1.5          | 0                                | 0    | 0    | 0    | 1  | 0  | 0 | 0 | 0 | 1.00           | 1.00   | 1.00        |                   |
| 1.6          | 0                                | 0    | 0    | 0    | 4  | 0  | 0 | 0 | 0 | 1.00           | 1.00   | 1.00        |                   |
| 1.7          | 0                                | 0    | 0    | 0    | 1  | 0  | 0 | 0 | 0 | 1.00           | 1.00   | 1.00        |                   |
| 1.8          | 0                                | 0    | 0    | 0    | 5  | 0  | 0 | 0 | 0 | 1.00           | 1.00   | 1.00        |                   |
| 1.9          | 0                                | 0    | 0    | 0    | 1  | 0  | 0 | 0 | 0 | 1.00           | 1.00   | 1.00        |                   |
| Question no. | Frequency of the indicated value |      |      |      |    |    |   |   |   | Geometric mean | Median | Modal value | Consistency index |
| [-]          | -9                               | -7   | -5   | -3   | 1  | 2  | 3 | 4 | 5 | [-]            | [-]    | [-]         | [-]               |
| 2.1          | 0                                | 0    | 0    | 0    | 0  | 1  | 8 | 3 | 4 | 3.51           | 3.00   | 3.00        |                   |
| 2.2          | 0                                | 0    | 0    | 0    | 0  | 0  | 5 | 9 | 2 | 3.76           | 4.00   | 4.00        |                   |
| 2.3          | 0                                | 0    | 0    | 0    | 1  | 0  | 7 | 1 | 0 | 2.74           | 3.00   | 3.00        |                   |
| 2.4          | 0                                | 0    | 0    | 0    | 0  | 0  | 5 | 1 | 0 | 3.15           | 3.00   | 3.00        |                   |
| 2.5          | 0                                | 0    | 0    | 0    | 0  | 0  | 4 | 1 | 0 | 3.18           | 3.00   | 3.00        |                   |
| Question no. | Frequency of the indicated value |      |      |      |    |    |   |   |   | Geometric mean | Median | Modal value | Consistency index |
| [-]          | -9                               | -7   | -5   | -3   | 1  | 3  | 5 | 7 | 9 | [-]            | [-]    | [-]         | [-]               |
| [-]          | 0.11                             | 0.14 | 0.20 | 0.33 | 1  | 3  | 5 | 7 | 9 | [-]            | [-]    | [-]         | [-]               |
| 3.1          | 0                                | 1    | 5    | 6    | 3  | 2  | 0 | 0 | 0 | 0.43           | 0.33   | 0.33        | 0.09              |
| 3.2          | 0                                | 0    | 4    | 8    | 1  | 3  | 1 | 0 | 0 | 0.54           | 0.33   | 0.33        |                   |
| 3.3          | 0                                | 0    | 1    | 3    | 7  | 4  | 1 | 0 | 1 | 1.21           | 1.00   | 1.00        |                   |
| 3.4          | 0                                | 0    | 1    | 3    | 5  | 7  | 0 | 1 | 0 | 1.32           | 1.00   | 3.00        |                   |
| 3.5          | 0                                | 0    | 3    | 2    | 6  | 4  | 2 | 0 | 0 | 1.04           | 1.00   | 1.00        |                   |
| 3.6          | 0                                | 0    | 1    | 0    | 5  | 9  | 1 | 0 | 1 | 2.04           | 3.00   | 3.00        |                   |
| 3.7          | 0                                | 0    | 0    | 1    | 6  | 7  | 2 | 0 | 1 | 2.03           | 3.00   | 3.00        |                   |
| 3.8          | 0                                | 0    | 1    | 2    | 2  | 8  | 3 | 0 | 1 | 2.03           | 3.00   | 3.00        |                   |
| 3.9          | 0                                | 0    | 2    | 2    | 2  | 6  | 4 | 0 | 1 | 1.78           | 3.00   | 3.00        |                   |
| 3.10         | 0                                | 1    | 2    | 0    | 14 | 0  | 0 | 0 | 0 | 0.74           | 1.00   | 1.00        |                   |
| 4.1          | 0                                | 1    | 0    | 1    | 3  | 6  | 4 | 2 | 0 | 2.26           | 3.00   | 3.00        | 0.13              |
| 4.2          | 1                                | 0    | 0    | 2    | 4  | 7  | 3 | 0 | 0 | 1.61           | 3.00   | 3.00        |                   |
| 4.3          | 0                                | 0    | 1    | 0    | 3  | 10 | 2 | 1 | 0 | 2.35           | 3.00   | 3.00        |                   |
| 4.4          | 0                                | 0    | 1    | 1    | 3  | 9  | 3 | 0 | 0 | 2.03           | 3.00   | 3.00        |                   |
| 4.5          | 0                                | 0    | 5    | 8    | 3  | 0  | 0 | 1 | 0 | 0.42           | 0.33   | 0.33        |                   |
| 4.6          | 0                                | 0    | 2    | 6    | 5  | 3  | 0 | 1 | 0 | 0.76           | 1.00   | 0.33        |                   |
| 4.7          | 0                                | 0    | 2    | 5    | 5  | 4  | 0 | 1 | 0 | 0.87           | 1.00   | 0.33/1.00   |                   |
| 4.8          | 0                                | 0    | 0    | 0    | 4  | 10 | 2 | 1 | 0 | 2.59           | 3.00   | 3.00        |                   |
| 4.9          | 0                                | 0    | 0    | 0    | 5  | 8  | 3 | 1 | 0 | 2.50           | 3.00   | 3.00        |                   |

|      |   |   |   |    |    |    |   |   |   |             |      |                |  |
|------|---|---|---|----|----|----|---|---|---|-------------|------|----------------|--|
| 4.10 | 0 | 0 | 1 | 3  | 13 | 0  | 0 | 0 | 0 | <b>0.75</b> | 1.00 | 1.00           |  |
| 5.1  | 0 | 0 | 3 | 5  | 5  | 3  | 1 | 0 | 0 | <b>0.73</b> | 1.00 | 0.33/1.00      |  |
| 5.2  | 0 | 0 | 5 | 7  | 5  | 0  | 0 | 0 | 0 | <b>0.40</b> | 0.33 | 0.33           |  |
| 5.3  | 0 | 0 | 1 | 3  | 4  | 7  | 2 | 0 | 0 | <b>1.42</b> | 3.00 | 3.00           |  |
| 5.4  | 0 | 0 | 0 | 2  | 4  | 5  | 4 | 1 | 1 | <b>2.26</b> | 3.00 | 3.00           |  |
| 5.5  | 0 | 0 | 2 | 10 | 4  | 1  | 0 | 0 | 0 | <b>0.46</b> | 0.33 | 0.33           |  |
| 5.6  | 0 | 0 | 0 | 0  | 5  | 10 | 2 | 0 | 0 | <b>2.31</b> | 3.00 | 3.00           |  |
| 5.7  | 0 | 0 | 0 | 0  | 3  | 10 | 3 | 0 | 1 | <b>2.88</b> | 3.00 | 3.00           |  |
| 5.8  | 0 | 0 | 0 | 1  | 1  | 9  | 5 | 0 | 1 | <b>3.06</b> | 3.00 | 3.00           |  |
| 5.9  | 0 | 0 | 0 | 0  | 1  | 10 | 5 | 0 | 1 | <b>3.49</b> | 3.00 | 3.00           |  |
| 5.10 | 0 | 0 | 0 | 0  | 12 | 3  | 2 | 0 | 0 | <b>1.47</b> | 1.00 | 1.00           |  |
| 6.1  | 0 | 0 | 3 | 3  | 2  | 5  | 4 | 0 | 0 | <b>1.25</b> | 3.00 | 3.00           |  |
| 6.2  | 0 | 0 | 0 | 2  | 1  | 8  | 6 | 0 | 0 | <b>2.60</b> | 3.00 | 3.00           |  |
| 6.3  | 0 | 0 | 0 | 5  | 1  | 5  | 5 | 1 | 0 | <b>1.80</b> | 3.00 | 0.33/1.00/3.00 |  |
| 6.4  | 0 | 0 | 0 | 8  | 4  | 4  | 1 | 0 | 0 | <b>0.85</b> | 1.00 | 0.33           |  |
| 6.5  | 0 | 0 | 0 | 2  | 3  | 10 | 2 | 0 | 0 | <b>2.03</b> | 3.00 | 3.00           |  |
| 6.6  | 0 | 0 | 0 | 1  | 3  | 8  | 5 | 0 | 0 | <b>2.52</b> | 3.00 | 3.00           |  |
| 6.7  | 0 | 0 | 0 | 8  | 4  | 2  | 3 | 0 | 0 | <b>0.90</b> | 1.00 | 0.33           |  |
| 6.8  | 0 | 0 | 0 | 4  | 5  | 6  | 2 | 0 | 0 | <b>1.38</b> | 1.00 | 3.00           |  |
| 6.9  | 0 | 0 | 1 | 14 | 1  | 1  | 0 | 0 | 0 | <b>0.39</b> | 0.33 | 0.33           |  |
| 6.10 | 0 | 1 | 4 | 7  | 4  | 0  | 1 | 0 | 0 | <b>0.43</b> | 0.33 | 0.33           |  |
| 7.1  | 0 | 0 | 0 | 3  | 8  | 6  | 0 | 0 | 0 | <b>1.21</b> | 1.00 | 1.00           |  |
| 7.2  | 0 | 0 | 3 | 9  | 5  | 0  | 0 | 0 | 0 | <b>0.42</b> | 0.33 | 0.33           |  |
| 7.3  | 0 | 2 | 3 | 11 | 1  | 0  | 0 | 0 | 0 | <b>0.29</b> | 0.33 | 0.33           |  |
| 7.4  | 0 | 0 | 2 | 11 | 4  | 0  | 0 | 0 | 0 | <b>0.41</b> | 0.33 | 0.33           |  |
| 7.5  | 0 | 0 | 4 | 9  | 3  | 1  | 0 | 0 | 0 | <b>0.41</b> | 0.33 | 0.33           |  |
| 7.6  | 0 | 1 | 5 | 10 | 1  | 0  | 0 | 0 | 0 | <b>0.29</b> | 0.33 | 0.33           |  |
| 7.7  | 0 | 0 | 3 | 10 | 3  | 1  | 0 | 0 | 0 | <b>0.42</b> | 0.33 | 0.33           |  |
| 7.8  | 0 | 0 | 2 | 10 | 5  | 0  | 0 | 0 | 0 | <b>0.43</b> | 0.33 | 0.33           |  |
| 7.9  | 0 | 0 | 1 | 5  | 10 | 1  | 0 | 0 | 0 | <b>0.70</b> | 1.00 | 1.00           |  |
| 7.10 | 0 | 0 | 0 | 2  | 11 | 4  | 0 | 0 | 0 | <b>1.14</b> | 1.00 | 1.00           |  |
| 8.1  | 0 | 0 | 2 | 6  | 5  | 2  | 2 | 0 | 0 | <b>0.77</b> | 1.00 | 0.33           |  |
| 8.2  | 0 | 0 | 2 | 6  | 7  | 1  | 1 | 0 | 0 | <b>0.66</b> | 1.00 | 1.00           |  |
| 8.3  | 0 | 0 | 0 | 10 | 4  | 2  | 1 | 0 | 0 | <b>0.66</b> | 0.33 | 0.33           |  |
| 8.4  | 0 | 0 | 0 | 8  | 7  | 0  | 2 | 0 | 0 | <b>0.72</b> | 1.00 | 0.33           |  |
| 8.5  | 0 | 0 | 0 | 4  | 7  | 6  | 0 | 0 | 0 | <b>1.14</b> | 1.00 | 1.00           |  |
| 8.6  | 0 | 0 | 1 | 4  | 8  | 2  | 2 | 0 | 0 | <b>0.97</b> | 1.00 | 1.00           |  |
| 8.7  | 0 | 0 | 1 | 4  | 9  | 3  | 0 | 0 | 0 | <b>0.85</b> | 1.00 | 1.00           |  |
| 8.8  | 0 | 0 | 1 | 1  | 7  | 6  | 2 | 0 | 0 | <b>1.52</b> | 1.00 | 1.00           |  |
| 8.9  | 0 | 0 | 0 | 5  | 8  | 2  | 2 | 0 | 0 | <b>1.00</b> | 1.00 | 1.00           |  |
| 8.10 | 0 | 0 | 0 | 6  | 9  | 1  | 1 | 0 | 0 | <b>0.80</b> | 1.00 | 1.00           |  |
| 9.1  | 0 | 0 | 0 | 5  | 4  | 6  | 2 | 0 | 0 | <b>1.29</b> | 1.00 | 3.00           |  |
| 9.2  | 0 | 0 | 2 | 3  | 4  | 7  | 1 | 0 | 0 | <b>1.18</b> | 1.00 | 3.00           |  |
| 9.3  | 0 | 0 | 0 | 3  | 4  | 8  | 2 | 0 | 0 | <b>1.67</b> | 3.00 | 3.00           |  |
| 9.4  | 0 | 0 | 4 | 6  | 6  | 1  | 0 | 0 | 0 | <b>0.50</b> | 0.33 | 0.33/1.00      |  |
| 9.5  | 0 | 0 | 2 | 3  | 10 | 2  | 0 | 0 | 0 | <b>0.78</b> | 1.00 | 1.00           |  |
| 9.6  | 0 | 0 | 1 | 4  | 10 | 2  | 0 | 0 | 0 | <b>0.80</b> | 1.00 | 1.00           |  |
| 9.7  | 0 | 0 | 0 | 7  | 7  | 3  | 0 | 0 | 0 | <b>0.77</b> | 1.00 | 1.00           |  |
| 9.8  | 0 | 0 | 2 | 12 | 3  | 0  | 0 | 0 | 0 | <b>0.38</b> | 0.33 | 0.33           |  |
| 9.9  | 0 | 0 | 3 | 9  | 5  | 0  | 0 | 0 | 0 | <b>0.42</b> | 0.33 | 0.33           |  |
| 9.10 | 0 | 0 | 0 | 4  | 8  | 4  | 1 | 0 | 0 | <b>1.10</b> | 1.00 | 1.00           |  |
| 9.11 | 0 | 0 | 2 | 11 | 3  | 1  | 0 | 0 | 0 | <b>0.43</b> | 0.33 | 0.33           |  |

| 9.12         | 0                                | 0  | 1  | 11 | 5  | 0 | 0 | 0 | 0 | <b>0.45</b>    | 0.33   | 0.33        |                   |
|--------------|----------------------------------|----|----|----|----|---|---|---|---|----------------|--------|-------------|-------------------|
| 9.13         | 0                                | 0  | 5  | 7  | 2  | 3 | 0 | 0 | 0 | <b>0.48</b>    | 0.33   | 0.33        |                   |
| 9.14         | 0                                | 0  | 4  | 7  | 2  | 4 | 0 | 0 | 0 | <b>0.56</b>    | 0.33   | 0.33        |                   |
| 9.15         | 0                                | 0  | 0  | 0  | 8  | 7 | 2 | 0 | 0 | <b>1.90</b>    | 3.00   | 1.00        |                   |
| Question no. | Frequency of the indicated value |    |    |    |    |   |   |   |   | Geometric mean | Median | Modal value | Consistency index |
| [-]          | -9                               | -7 | -5 | -3 | 1  | 2 | 3 | 4 | 5 | [-]            | [-]    | [-]         | [-]               |
| 10.1         | 0                                | 0  | 0  | 0  | 0  | 2 | 5 | 8 | 2 | <b>3.48</b>    | 4.00   | 4.00        |                   |
| 10.2         | 0                                | 0  | 0  | 0  | 0  | 2 | 6 | 9 | 0 | <b>3.33</b>    | 4.00   | 4.00        |                   |
| Question no. | Frequency of the indicated value |    |    |    |    |   |   |   |   | Geometric mean | Median | Modal value | Consistency index |
| [-]          | -9                               | -7 | -5 | -3 | 1  | 2 | 3 | 4 | 5 | [-]            | [-]    | [-]         | [-]               |
| 11.1         | 0                                | 0  | 0  | 0  | 13 | 0 | 0 | 0 | 0 | <b>1.00</b>    | 1.00   | 1.00        |                   |
| 11.2         | 0                                | 0  | 0  | 0  | 4  | 0 | 0 | 0 | 0 | <b>1.00</b>    | 1.00   | 1.00        |                   |
| 11.3         | 0                                | 0  | 0  | 0  | 0  | 0 | 0 | 0 | 0 | <b>n/a</b>     | n/a    | n/a         |                   |
| 12.1         | 0                                | 0  | 0  | 0  | 0  | 0 | 0 | 0 | 0 | <b>n/a</b>     | n/a    | n/a         |                   |
| 12.2         | 0                                | 0  | 0  | 0  | 1  | 0 | 0 | 0 | 0 | <b>1.00</b>    | 1.00   | 1.00        |                   |
| 12.3         | 0                                | 0  | 0  | 0  | 0  | 0 | 0 | 0 | 0 | <b>n/a</b>     | n/a    | n/a         |                   |
| 12.4         | 0                                | 0  | 0  | 0  | 0  | 0 | 0 | 0 | 0 | <b>n/a</b>     | n/a    | n/a         |                   |
| 12.5         | 0                                | 0  | 0  | 0  | 15 | 0 | 0 | 0 | 0 | <b>1.00</b>    | 1.00   | 1.00        |                   |
| 12.6         | 0                                | 0  | 0  | 0  | 1  | 0 | 0 | 0 | 0 | <b>1.00</b>    | 1.00   | 1.00        |                   |
| 12.7         | 0                                | 0  | 0  | 0  | 2  | 0 | 0 | 0 | 0 | <b>1.00</b>    | 1.00   | 1.00        |                   |
| 12.8         | 0                                | 0  | 0  | 0  | 10 | 0 | 0 | 0 | 0 | <b>1.00</b>    | 1.00   | 1.00        |                   |
| 12.9         | 0                                | 0  | 0  | 0  | 2  | 0 | 0 | 0 | 0 | <b>1.00</b>    | 1.00   | 1.00        |                   |
| 12.10        | 0                                | 0  | 0  | 0  | 2  | 0 | 0 | 0 | 0 | <b>1.00</b>    | 1.00   | 1.00        |                   |
| 12.11        | 0                                | 0  | 0  | 0  | 1  | 0 | 0 | 0 | 0 | <b>1.00</b>    | 1.00   | 1.00        |                   |
| 12.12        | 0                                | 0  | 0  | 0  | 0  | 0 | 0 | 0 | 0 | <b>n/a</b>     | n/a    | n/a         |                   |
| 12.13        | 0                                | 0  | 0  | 0  | 2  | 0 | 0 | 0 | 0 | <b>1.00</b>    | 1.00   | 1.00        |                   |
| 12.14        | 0                                | 0  | 0  | 0  | 0  | 0 | 0 | 0 | 0 | <b>n/a</b>     | n/a    | n/a         |                   |
| 12.15        | 0                                | 0  | 0  | 0  | 1  | 0 | 0 | 0 | 0 | <b>1.00</b>    | 1.00   | 1.00        |                   |
| 12.16        | 0                                | 0  | 0  | 0  | 14 | 0 | 0 | 0 | 0 | <b>1.00</b>    | 1.00   | 1.00        |                   |
| 12.17        | 0                                | 0  | 0  | 0  | 0  | 0 | 0 | 0 | 0 | <b>n/a</b>     | n/a    | n/a         |                   |
| 12.18        | 0                                | 0  | 0  | 0  | 0  | 0 | 0 | 0 | 0 | <b>n/a</b>     | n/a    | n/a         |                   |
| 13.1         | 0                                | 0  | 0  | 0  | 0  | 0 | 0 | 0 | 0 | <b>n/a</b>     | n/a    | n/a         |                   |
| 13.2         | 0                                | 0  | 0  | 0  | 2  | 0 | 0 | 0 | 0 | <b>1.00</b>    | 1.00   | 1.00        |                   |
| 13.3         | 0                                | 0  | 0  | 0  | 7  | 0 | 0 | 0 | 0 | <b>1.00</b>    | 1.00   | 1.00        |                   |
| 13.4         | 0                                | 0  | 0  | 0  | 8  | 0 | 0 | 0 | 0 | <b>1.00</b>    | 1.00   | 1.00        |                   |
| 13.5         | 0                                | 0  | 0  | 0  | 0  | 0 | 0 | 0 | 0 | <b>n/a</b>     | n/a    | n/a         |                   |
| 13.6         | 0                                | 0  | 0  | 0  | 0  | 0 | 0 | 0 | 0 | <b>n/a</b>     | n/a    | n/a         |                   |

## Contractor group

| Question no. | Frequency of the indicated value |      |      |      |   |   |   |   |   | Geometric mean | Median | Modal value    | Consistency index |
|--------------|----------------------------------|------|------|------|---|---|---|---|---|----------------|--------|----------------|-------------------|
| [-]          | -9                               | -7   | -5   | -3   | 1 | 3 | 5 | 7 | 9 | [-]            | [-]    | [-]            | [-]               |
| [-]          | 0.11                             | 0.14 | 0.20 | 0.33 | 1 | 3 | 5 | 7 | 9 | [-]            | [-]    | [-]            | [-]               |
| 1.1          | 0                                | 0    | 0    | 0    | 2 | 0 | 0 | 0 | 0 | 1.00           | 1.00   | 1.00           |                   |
| 1.2          | 0                                | 0    | 0    | 0    | 1 | 0 | 0 | 0 | 0 | 1.00           | 1.00   | 1.00           |                   |
| 1.3          | 0                                | 0    | 0    | 0    | 1 | 0 | 0 | 0 | 0 | 1.00           | 1.00   | 1.00           |                   |
| 1.4          | 0                                | 0    | 0    | 0    | 1 | 0 | 0 | 0 | 0 | 1.00           | 1.00   | 1.00           |                   |
| 1.5          | 0                                | 0    | 0    | 0    | 1 | 0 | 0 | 0 | 0 | 1.00           | 1.00   | 1.00           |                   |
| 1.6          | 0                                | 0    | 0    | 0    | 1 | 0 | 0 | 0 | 0 | 1.00           | 1.00   | 1.00           |                   |
| 1.7          | 0                                | 0    | 0    | 0    | 1 | 0 | 0 | 0 | 0 | 1.00           | 1.00   | 1.00           |                   |
| 1.8          | 0                                | 0    | 0    | 0    | 0 | 0 | 0 | 0 | 0 | n/a            | n/a    | n/a            |                   |
| 1.9          | 0                                | 0    | 0    | 0    | 0 | 0 | 0 | 0 | 0 | n/a            | n/a    | n/a            |                   |
| Question no. | Frequency of the indicated value |      |      |      |   |   |   |   |   | Geometric mean | Median | Modal value    | Consistency index |
| [-]          | -9                               | -7   | -5   | -3   | 1 | 2 | 3 | 4 | 5 | [-]            | [-]    | [-]            | [-]               |
| 2.1          | 0                                | 0    | 0    | 0    | 0 | 0 | 4 | 5 | 1 | 3.65           | 4.00   | 4.00           |                   |
| 2.2          | 0                                | 0    | 0    | 0    | 0 | 0 | 3 | 6 | 0 | 3.63           | 4.00   | 4.00           |                   |
| 2.3          | 0                                | 0    | 0    | 0    | 1 | 0 | 1 | 1 | 0 | 2.29           | 3.00   | 1.00/3.00/4.00 |                   |
| 2.4          | 0                                | 0    | 0    | 0    | 0 | 0 | 1 | 2 | 0 | 3.63           | 4.00   | 4.00           |                   |
| 2.5          | 0                                | 0    | 0    | 0    | 0 | 0 | 2 | 2 | 0 | 3.46           | 3.50   | 3.00           |                   |
| Question no. | Frequency of the indicated value |      |      |      |   |   |   |   |   | Geometric mean | Median | Modal value    | Consistency index |
| [-]          | -9                               | -7   | -5   | -3   | 1 | 3 | 5 | 7 | 9 | [-]            | [-]    | [-]            | [-]               |
| [-]          | 0.11                             | 0.14 | 0.20 | 0.33 | 1 | 3 | 5 | 7 | 9 | [-]            | [-]    | [-]            | [-]               |
| 3.1          | 0                                | 2    | 1    | 4    | 1 | 3 | 0 | 0 | 0 | 0.55           | 0.33   | 0.33           | 0.12              |
| 3.2          | 0                                | 0    | 0    | 4    | 1 | 4 | 1 | 1 | 0 | 1.38           | 3.00   | 0.33/3.00      |                   |
| 3.3          | 0                                | 0    | 0    | 1    | 2 | 5 | 2 | 1 | 0 | 2.38           | 3.00   | 1.00           |                   |
| 3.4          | 0                                | 0    | 0    | 1    | 2 | 5 | 2 | 1 | 0 | 2.38           | 3.00   | 3.00           |                   |
| 3.5          | 0                                | 0    | 0    | 1    | 7 | 3 | 0 | 0 | 0 | 1.22           | 1.00   | 1.00           |                   |
| 3.6          | 0                                | 0    | 0    | 1    | 1 | 7 | 2 | 0 | 0 | 2.44           | 3.00   | 3.00           |                   |
| 3.7          | 0                                | 0    | 0    | 2    | 1 | 6 | 2 | 0 | 0 | 2.00           | 3.00   | 3.00           |                   |
| 3.8          | 0                                | 0    | 0    | 2    | 1 | 6 | 2 | 0 | 0 | 2.00           | 3.00   | 3.00           |                   |
| 3.9          | 0                                | 0    | 0    | 2    | 2 | 3 | 4 | 0 | 0 | 1.98           | 3.00   | 3.00           |                   |
| 3.10         | 0                                | 1    | 0    | 0    | 7 | 2 | 1 | 0 | 0 | 1.18           | 1.00   | 1.00           |                   |
| 4.1          | 0                                | 2    | 1    | 2    | 0 | 2 | 4 | 0 | 0 | 1.09           | 3.00   | 3.00           | 0.10              |
| 4.2          | 1                                | 1    | 1    | 2    | 0 | 4 | 2 | 0 | 0 | 0.97           | 3.00   | 3.00           |                   |
| 4.3          | 0                                | 1    | 2    | 3    | 0 | 5 | 0 | 0 | 0 | 0.76           | 0.33   | 3.00           |                   |
| 4.4          | 1                                | 1    | 2    | 2    | 1 | 4 | 0 | 0 | 0 | 0.63           | 0.33   | 3.00           |                   |
| 4.5          | 0                                | 0    | 1    | 10   | 0 | 0 | 0 | 0 | 0 | 0.32           | 0.33   | 0.33           |                   |
| 4.6          | 0                                | 0    | 1    | 6    | 2 | 2 | 0 | 0 | 0 | 0.58           | 0.33   | 0.33           |                   |
| 4.7          | 0                                | 0    | 1    | 7    | 1 | 0 | 2 | 0 | 0 | 0.58           | 0.33   | 1.00           |                   |
| 4.8          | 0                                | 0    | 0    | 2    | 0 | 6 | 3 | 0 | 0 | 2.31           | 3.00   | 3.00           |                   |
| 4.9          | 0                                | 0    | 0    | 1    | 3 | 6 | 1 | 0 | 0 | 1.91           | 3.00   | 3.00           |                   |
| 4.10         | 0                                | 0    | 3    | 1    | 7 | 0 | 0 | 0 | 0 | 0.58           | 1.00   | 1.00           |                   |
| 5.1          | 0                                | 0    | 3    | 5    | 1 | 2 | 0 | 0 | 0 | 0.48           | 0.33   | 1.00           | 0.12              |

|      |   |   |   |   |   |   |   |   |   |             |      |           |      |
|------|---|---|---|---|---|---|---|---|---|-------------|------|-----------|------|
| 5.2  | 0 | 1 | 3 | 4 | 3 | 0 | 0 | 0 | 0 | <b>0.36</b> | 0.33 | 0.33      |      |
| 5.3  | 0 | 0 | 0 | 4 | 3 | 4 | 0 | 0 | 0 | <b>1.00</b> | 1.00 | 0.33/3.00 |      |
| 5.4  | 0 | 0 | 0 | 4 | 2 | 2 | 2 | 1 | 0 | <b>1.31</b> | 1.00 | 3.00      |      |
| 5.5  | 0 | 0 | 1 | 4 | 5 | 1 | 0 | 0 | 0 | <b>0.64</b> | 1.00 | 0.33      |      |
| 5.6  | 0 | 0 | 0 | 1 | 4 | 6 | 0 | 0 | 0 | <b>1.65</b> | 3.00 | 3.00      |      |
| 5.7  | 0 | 0 | 0 | 1 | 2 | 5 | 1 | 2 | 0 | <b>2.46</b> | 3.00 | 3.00      |      |
| 5.8  | 0 | 0 | 0 | 3 | 1 | 6 | 1 | 0 | 0 | <b>1.56</b> | 3.00 | 3.00      |      |
| 5.9  | 0 | 0 | 0 | 0 | 1 | 9 | 1 | 0 | 0 | <b>2.84</b> | 3.00 | 3.00      |      |
| 5.10 | 0 | 0 | 0 | 0 | 7 | 4 | 0 | 0 | 0 | <b>1.49</b> | 1.00 | 1.00      |      |
| 6.1  | 0 | 0 | 1 | 1 | 2 | 5 | 2 | 0 | 0 | <b>1.73</b> | 3.00 | 3.00      | 0.11 |
| 6.2  | 0 | 0 | 0 | 1 | 3 | 5 | 2 | 0 | 0 | <b>2.00</b> | 3.00 | 3.00      |      |
| 6.3  | 0 | 0 | 0 | 1 | 2 | 4 | 3 | 1 | 0 | <b>2.50</b> | 3.00 | 3.00      |      |
| 6.4  | 0 | 0 | 0 | 3 | 8 | 0 | 0 | 0 | 0 | <b>0.74</b> | 1.00 | 0.33      |      |
| 6.5  | 0 | 0 | 0 | 2 | 0 | 9 | 0 | 0 | 0 | <b>2.01</b> | 3.00 | 3.00      |      |
| 6.6  | 0 | 0 | 0 | 3 | 1 | 4 | 3 | 0 | 0 | <b>1.71</b> | 3.00 | 3.00      |      |
| 6.7  | 0 | 0 | 0 | 6 | 3 | 2 | 0 | 0 | 0 | <b>0.67</b> | 0.33 | 0.33      |      |
| 6.8  | 0 | 0 | 0 | 3 | 1 | 7 | 0 | 0 | 0 | <b>1.49</b> | 3.00 | 3.00      |      |
| 6.9  | 0 | 0 | 0 | 9 | 0 | 2 | 0 | 0 | 0 | <b>0.50</b> | 0.33 | 0.33      |      |
| 6.10 | 0 | 1 | 3 | 2 | 5 | 0 | 0 | 0 | 0 | <b>0.44</b> | 0.33 | 0.33      |      |
| 7.1  | 0 | 0 | 0 | 0 | 5 | 6 | 0 | 0 | 0 | <b>1.82</b> | 3.00 | 1.00      | 0.17 |
| 7.2  | 0 | 0 | 1 | 7 | 3 | 0 | 0 | 0 | 0 | <b>0.43</b> | 0.33 | 0.33      |      |
| 7.3  | 0 | 0 | 2 | 8 | 1 | 0 | 0 | 0 | 0 | <b>0.34</b> | 0.33 | 0.33      |      |
| 7.4  | 0 | 0 | 0 | 7 | 2 | 2 | 0 | 0 | 0 | <b>0.61</b> | 0.33 | 0.33      |      |
| 7.5  | 0 | 0 | 1 | 7 | 2 | 1 | 0 | 0 | 0 | <b>0.47</b> | 0.33 | 0.33      |      |
| 7.6  | 0 | 1 | 4 | 5 | 1 | 0 | 0 | 0 | 0 | <b>0.28</b> | 0.33 | 0.33      |      |
| 7.7  | 0 | 0 | 3 | 4 | 4 | 0 | 0 | 0 | 0 | <b>0.43</b> | 0.33 | 0.33/1.00 |      |
| 7.8  | 0 | 0 | 2 | 4 | 5 | 0 | 0 | 0 | 0 | <b>0.50</b> | 0.33 | 0.33      |      |
| 7.9  | 0 | 0 | 0 | 4 | 5 | 2 | 0 | 0 | 0 | <b>0.82</b> | 1.00 | 1.00      |      |
| 7.10 | 0 | 0 | 0 | 2 | 6 | 0 | 2 | 1 | 0 | <b>1.31</b> | 1.00 | 1.00      |      |
| 8.1  | 0 | 0 | 0 | 5 | 4 | 2 | 0 | 0 | 0 | <b>0.74</b> | 1.00 | 0.33      | 0.03 |
| 8.2  | 0 | 0 | 0 | 4 | 2 | 5 | 0 | 0 | 0 | <b>1.11</b> | 1.00 | 1.00      |      |
| 8.3  | 0 | 0 | 1 | 7 | 1 | 2 | 0 | 0 | 0 | <b>0.52</b> | 0.33 | 0.33      |      |
| 8.4  | 0 | 0 | 0 | 4 | 4 | 3 | 0 | 0 | 0 | <b>0.90</b> | 1.00 | 0.33/1.00 |      |
| 8.5  | 0 | 0 | 0 | 4 | 2 | 5 | 0 | 0 | 0 | <b>1.11</b> | 1.00 | 1.00      |      |
| 8.6  | 0 | 0 | 1 | 5 | 3 | 1 | 1 | 0 | 0 | <b>0.67</b> | 0.33 | 1.00      |      |
| 8.7  | 0 | 0 | 1 | 5 | 4 | 0 | 1 | 0 | 0 | <b>0.61</b> | 0.33 | 1.00      |      |
| 8.8  | 0 | 0 | 2 | 2 | 5 | 1 | 1 | 0 | 0 | <b>0.78</b> | 1.00 | 1.00      |      |
| 8.9  | 0 | 0 | 0 | 3 | 7 | 0 | 1 | 0 | 0 | <b>0.86</b> | 1.00 | 1.00      |      |
| 8.10 | 0 | 0 | 0 | 4 | 6 | 0 | 1 | 0 | 0 | <b>0.78</b> | 1.00 | 1.00      |      |
| 9.1  | 0 | 0 | 0 | 1 | 2 | 8 | 0 | 0 | 0 | <b>2.01</b> | 3.00 | 3.00      | 0.05 |
| 9.2  | 0 | 0 | 0 | 1 | 2 | 7 | 1 | 0 | 0 | <b>2.11</b> | 3.00 | 3.00      |      |
| 9.3  | 0 | 0 | 0 | 2 | 4 | 3 | 2 | 0 | 0 | <b>1.48</b> | 1.00 | 3.00      |      |
| 9.4  | 0 | 0 | 0 | 8 | 2 | 1 | 0 | 0 | 0 | <b>0.50</b> | 0.33 | 1.00      |      |
| 9.5  | 0 | 0 | 0 | 5 | 3 | 2 | 1 | 0 | 0 | <b>0.86</b> | 1.00 | 1.00      |      |
| 9.6  | 0 | 0 | 0 | 2 | 6 | 3 | 0 | 0 | 0 | <b>1.11</b> | 1.00 | 1.00      |      |
| 9.7  | 0 | 0 | 0 | 5 | 1 | 5 | 0 | 0 | 0 | <b>1.00</b> | 1.00 | 0.33/3.00 |      |
| 9.8  | 0 | 0 | 2 | 6 | 3 | 0 | 0 | 0 | 0 | <b>0.41</b> | 0.33 | 0.33      |      |
| 9.9  | 0 | 0 | 0 | 7 | 2 | 2 | 0 | 0 | 0 | <b>0.61</b> | 0.33 | 0.33      |      |
| 9.10 | 0 | 0 | 0 | 6 | 2 | 3 | 0 | 0 | 0 | <b>0.74</b> | 0.33 | 1.00      |      |
| 9.11 | 0 | 0 | 2 | 6 | 2 | 1 | 0 | 0 | 0 | <b>0.45</b> | 0.33 | 0.33      |      |
| 9.12 | 0 | 0 | 0 | 5 | 6 | 0 | 0 | 0 | 0 | <b>0.61</b> | 1.00 | 0.33      |      |
| 9.13 | 0 | 0 | 4 | 5 | 1 | 1 | 0 | 0 | 0 | <b>0.37</b> | 0.33 | 0.33      |      |

| 9.14         | 0                                | 0  | 2  | 5  | 1 | 3 | 0 | 0 | 0 | <b>0.61</b>    | 0.33   | 0.33        |                   |
|--------------|----------------------------------|----|----|----|---|---|---|---|---|----------------|--------|-------------|-------------------|
| 9.15         | 0                                | 0  | 0  | 1  | 7 | 2 | 1 | 0 | 0 | <b>1.28</b>    | 1.00   | 1.00        |                   |
| Question no. | Frequency of the indicated value |    |    |    |   |   |   |   |   | Geometric mean | Median | Modal value | Consistency index |
| [-]          | -9                               | -7 | -5 | -3 | 1 | 2 | 3 | 4 | 5 | [-]            | [-]    | [-]         | [-]               |
| 10.1         | 0                                | 0  | 0  | 0  | 0 | 1 | 4 | 4 | 2 | <b>3.52</b>    | 4.00   | 3.00/4.00   |                   |
| 10.2         | 0                                | 0  | 0  | 0  | 0 | 3 | 4 | 4 | 0 | <b>2.98</b>    | 3.00   | 3.00/4.00   |                   |
| Question no. | Frequency of the indicated value |    |    |    |   |   |   |   |   | Geometric mean | Median | Modal value | Consistency index |
| [-]          | -9                               | -7 | -5 | -3 | 1 | 2 | 3 | 4 | 5 | [-]            | [-]    | [-]         | [-]               |
| 11.1         | 0                                | 0  | 0  | 0  | 9 | 0 | 0 | 0 | 0 | <b>1.00</b>    | 1.00   | 1.00        |                   |
| 11.2         | 0                                | 0  | 0  | 0  | 2 | 0 | 0 | 0 | 0 | <b>1.00</b>    | 1.00   | 1.00        |                   |
| 11.3         | 0                                | 0  | 0  | 0  | 0 | 0 | 0 | 0 | 0 | <b>n/a</b>     | n/a    | n/a         |                   |
| 12.1         | 0                                | 0  | 0  | 0  | 0 | 0 | 0 | 0 | 0 | <b>n/a</b>     | n/a    | n/a         |                   |
| 12.2         | 0                                | 0  | 0  | 0  | 1 | 0 | 0 | 0 | 0 | <b>1.00</b>    | 1.00   | 1.00        |                   |
| 12.3         | 0                                | 0  | 0  | 0  | 1 | 0 | 0 | 0 | 0 | <b>n/a</b>     | n/a    | n/a         |                   |
| 12.4         | 0                                | 0  | 0  | 0  | 0 | 0 | 0 | 0 | 0 | <b>n/a</b>     | n/a    | n/a         |                   |
| 12.5         | 0                                | 0  | 0  | 0  | 7 | 0 | 0 | 0 | 0 | <b>1.00</b>    | 1.00   | 1.00        |                   |
| 12.6         | 0                                | 0  | 0  | 0  | 2 | 0 | 0 | 0 | 0 | <b>1.00</b>    | 1.00   | 1.00        |                   |
| 12.7         | 0                                | 0  | 0  | 0  | 1 | 0 | 0 | 0 | 0 | <b>1.00</b>    | 1.00   | 1.00        |                   |
| 12.8         | 0                                | 0  | 0  | 0  | 3 | 0 | 0 | 0 | 0 | <b>1.00</b>    | 1.00   | 1.00        |                   |
| 12.9         | 0                                | 0  | 0  | 0  | 4 | 0 | 0 | 0 | 0 | <b>1.00</b>    | 1.00   | 1.00        |                   |
| 12.10        | 0                                | 0  | 0  | 0  | 3 | 0 | 0 | 0 | 0 | <b>1.00</b>    | 1.00   | 1.00        |                   |
| 12.11        | 0                                | 0  | 0  | 0  | 0 | 0 | 0 | 0 | 0 | <b>n/a</b>     | n/a    | n/a         |                   |
| 12.12        | 0                                | 0  | 0  | 0  | 0 | 0 | 0 | 0 | 0 | <b>n/a</b>     | n/a    | n/a         |                   |
| 12.13        | 0                                | 0  | 0  | 0  | 1 | 0 | 0 | 0 | 0 | <b>1.00</b>    | 1.00   | 1.00        |                   |
| 12.14        | 0                                | 0  | 0  | 0  | 0 | 0 | 0 | 0 | 0 | <b>n/a</b>     | n/a    | n/a         |                   |
| 12.15        | 0                                | 0  | 0  | 0  | 1 | 0 | 0 | 0 | 0 | <b>1.00</b>    | 1.00   | 1.00        |                   |
| 12.16        | 0                                | 0  | 0  | 0  | 9 | 0 | 0 | 0 | 0 | <b>1.00</b>    | 1.00   | 1.00        |                   |
| 12.17        | 0                                | 0  | 0  | 0  | 0 | 0 | 0 | 0 | 0 | <b>n/a</b>     | n/a    | n/a         |                   |
| 12.18        | 0                                | 0  | 0  | 0  | 0 | 0 | 0 | 0 | 0 | <b>n/a</b>     | n/a    | n/a         |                   |
| 13.1         | 0                                | 0  | 0  | 0  | 0 | 0 | 0 | 0 | 0 | <b>n/a</b>     | n/a    | n/a         |                   |
| 13.2         | 0                                | 0  | 0  | 0  | 1 | 0 | 0 | 0 | 0 | <b>1.00</b>    | 1.00   | 1.00        |                   |
| 13.3         | 0                                | 0  | 0  | 0  | 6 | 0 | 0 | 0 | 0 | <b>1.00</b>    | 1.00   | 1.00        |                   |
| 13.4         | 0                                | 0  | 0  | 0  | 4 | 0 | 0 | 0 | 0 | <b>1.00</b>    | 1.00   | 1.00        |                   |
| 13.5         | 0                                | 0  | 0  | 0  | 0 | 0 | 0 | 0 | 0 | <b>n/a</b>     | n/a    | n/a         |                   |
| 13.6         | 0                                | 0  | 0  | 0  | 0 | 0 | 0 | 0 | 0 | <b>n/a</b>     | n/a    | n/a         |                   |

## Current user group

| Question no. | Frequency of the indicated value |      |      |      |   |   |   |   |   | Geometric mean | Median | Modal value | Consistency index |
|--------------|----------------------------------|------|------|------|---|---|---|---|---|----------------|--------|-------------|-------------------|
| [-]          | -9                               | -7   | -5   | -3   | 1 | 3 | 5 | 7 | 9 | [-]            | [-]    | [-]         | [-]               |
| [-]          | 0.11                             | 0.14 | 0.20 | 0.33 | 1 | 3 | 5 | 7 | 9 | [-]            | [-]    | [-]         | [-]               |
| 1.1          | 0                                | 0    | 0    | 0    | 0 | 1 | 0 | 0 | 0 | 1.00           | 1.00   | 1.00        |                   |
| 1.2          | 0                                | 0    | 0    | 0    | 0 | 0 | 0 | 0 | 0 | n/a            | n/a    | n/a         |                   |
| 1.3          | 0                                | 0    | 0    | 0    | 0 | 0 | 0 | 0 | 0 | n/a            | n/a    | n/a         |                   |
| 1.4          | 0                                | 0    | 0    | 0    | 0 | 1 | 0 | 0 | 0 | 1.00           | 1.00   | 1.00        |                   |
| 1.5          | 0                                | 0    | 0    | 0    | 0 | 6 | 0 | 0 | 0 | 1.00           | 1.00   | 1.00        |                   |
| 1.6          | 0                                | 0    | 0    | 0    | 0 | 2 | 0 | 0 | 0 | 1.00           | 1.00   | 1.00        |                   |
| 1.7          | 0                                | 0    | 0    | 0    | 0 | 0 | 0 | 0 | 0 | n/a            | n/a    | n/a         |                   |
| 1.8          | 0                                | 0    | 0    | 0    | 0 | 0 | 0 | 0 | 0 | n/a            | n/a    | n/a         |                   |
| 1.9          | 0                                | 0    | 0    | 0    | 0 | 0 | 0 | 0 | 0 | n/a            | n/a    | n/a         |                   |
| Question no. | Frequency of the indicated value |      |      |      |   |   |   |   |   | Geometric mean | Median | Modal value | Consistency index |
| [-]          | -9                               | -7   | -5   | -3   | 1 | 2 | 3 | 4 | 5 | [-]            | [-]    | [-]         | [-]               |
| 2.1          | 0                                | 0    | 0    | 0    | 0 | 0 | 0 | 0 | 2 | 4.64           | 5.00   | 5.00        |                   |
| 2.2          | 0                                | 0    | 0    | 0    | 0 | 1 | 0 | 0 | 3 | 2.83           | 4.00   | 4.00        |                   |
| 2.3          | 0                                | 0    | 0    | 0    | 0 | 1 | 0 | 2 | 0 | 2.08           | 3.00   | 3.00        |                   |
| 2.4          | 0                                | 0    | 0    | 0    | 0 | 1 | 0 | 2 | 0 | 2.08           | 3.00   | 3.00        |                   |
| 2.5          | 0                                | 0    | 0    | 0    | 0 | 1 | 0 | 2 | 0 | 2.08           | 3.00   | 3.00        |                   |
| Question no. | Frequency of the indicated value |      |      |      |   |   |   |   |   | Geometric mean | Median | Modal value | Consistency index |
| [-]          | -9                               | -7   | -5   | -3   | 1 | 3 | 5 | 7 | 9 | [-]            | [-]    | [-]         | [-]               |
| [-]          | 0.11                             | 0.14 | 0.20 | 0.33 | 1 | 3 | 5 | 7 | 9 | [-]            | [-]    | [-]         | [-]               |
| 3.1          | 1                                | 1    | 2    | 0    | 1 | 1 | 0 | 0 | 0 | 0.35           | 0.20   | 0.20        | 0.25              |
| 3.2          | 1                                | 0    | 1    | 0    | 3 | 1 | 0 | 0 | 0 | 0.64           | 1.00   | 1.00        |                   |
| 3.3          | 0                                | 0    | 1    | 0    | 2 | 0 | 3 | 0 | 0 | 1.71           | 3.00   | 5.00        |                   |
| 3.4          | 1                                | 0    | 0    | 1    | 1 | 2 | 1 | 0 | 0 | 1.09           | 2.00   | 3.00        |                   |
| 3.5          | 0                                | 0    | 0    | 1    | 3 | 2 | 0 | 0 | 0 | 1.20           | 1.00   | 1.00        |                   |
| 3.6          | 0                                | 0    | 0    | 0    | 2 | 0 | 3 | 0 | 1 | 3.22           | 5.00   | 5.00        |                   |
| 3.7          | 0                                | 0    | 0    | 0    | 2 | 1 | 3 | 0 | 0 | 2.69           | 4.00   | 5.00        |                   |
| 3.8          | 0                                | 0    | 0    | 0    | 2 | 0 | 3 | 0 | 1 | 3.22           | 5.00   | 5.00        |                   |
| 3.9          | 0                                | 0    | 0    | 0    | 1 | 1 | 4 | 0 | 0 | 3.51           | 5.00   | 5.00        |                   |
| 3.10         | 1                                | 2    | 1    | 1    | 1 | 0 | 0 | 0 | 0 | 0.23           | 0.17   | 0.14        |                   |
| 4.1          | 0                                | 1    | 0    | 0    | 0 | 1 | 1 | 3 | 0 | 3.00           | 6.00   | 7.00        | 0.24              |
| 4.2          | 0                                | 0    | 1    | 0    | 0 | 1 | 1 | 2 | 1 | 3.31           | 6.00   | 7.00        |                   |
| 4.3          | 0                                | 0    | 1    | 0    | 0 | 2 | 2 | 0 | 1 | 2.72           | 4.00   | 3.00/5.00   |                   |
| 4.4          | 0                                | 0    | 1    | 0    | 1 | 1 | 0 | 3 | 0 | 2.43           | 5.00   | 7.00        |                   |
| 4.5          | 0                                | 2    | 0    | 1    | 0 | 2 | 0 | 0 | 1 | 0.91           | 1.67   | 0.14/3.00   |                   |
| 4.6          | 0                                | 1    | 0    | 3    | 2 | 0 | 0 | 0 | 0 | 0.42           | 0.33   | 0.33        |                   |
| 4.7          | 0                                | 1    | 2    | 2    | 1 | 0 | 0 | 0 | 0 | 0.29           | 0.27   | 0.20/0.33   |                   |
| 4.8          | 1                                | 0    | 0    | 2    | 2 | 0 | 1 | 0 | 0 | 0.63           | 0.67   | 0.33/1.00   |                   |
| 4.9          | 1                                | 0    | 2    | 2    | 0 | 0 | 1 | 0 | 0 | 0.37           | 0.27   | 0.20/0.33   |                   |
| 4.10         | 0                                | 0    | 0    | 4    | 2 | 0 | 0 | 0 | 0 | 0.48           | 0.33   | 0.33        |                   |
| 5.1          | 0                                | 1    | 1    | 3    | 1 | 0 | 0 | 0 | 0 | 0.32           | 0.33   | 0.33        | 0.19              |

|      |   |   |   |   |   |   |   |   |   |             |      |                |      |
|------|---|---|---|---|---|---|---|---|---|-------------|------|----------------|------|
| 5.2  | 0 | 1 | 0 | 3 | 1 | 1 | 0 | 0 | 0 | <b>0.50</b> | 0.33 | 0.33           |      |
| 5.3  | 0 | 1 | 2 | 0 | 3 | 0 | 0 | 0 | 0 | <b>0.42</b> | 0.60 | 1.00           |      |
| 5.4  | 0 | 0 | 1 | 2 | 1 | 2 | 0 | 0 | 0 | <b>0.76</b> | 0.67 | 0.33/3.00      |      |
| 5.5  | 0 | 0 | 1 | 2 | 2 | 1 | 0 | 0 | 0 | <b>0.64</b> | 0.67 | 0.33/1.00      |      |
| 5.6  | 0 | 0 | 0 | 0 | 2 | 4 | 0 | 0 | 0 | <b>2.08</b> | 3.00 | 3.00           |      |
| 5.7  | 0 | 0 | 0 | 0 | 4 | 2 | 0 | 0 | 0 | <b>1.44</b> | 1.00 | 1.00           |      |
| 5.8  | 0 | 0 | 0 | 0 | 0 | 5 | 0 | 1 | 0 | <b>3.46</b> | 3.00 | 3.00           |      |
| 5.9  | 0 | 0 | 0 | 0 | 0 | 5 | 1 | 0 | 0 | <b>3.27</b> | 3.00 | 3.00           |      |
| 5.10 | 0 | 0 | 0 | 0 | 3 | 3 | 0 | 0 | 0 | <b>1.73</b> | 2.00 | 1.00/3.00      |      |
| 6.1  | 0 | 0 | 0 | 1 | 0 | 3 | 2 | 0 | 0 | <b>2.47</b> | 3.00 | 3.00           | 0.21 |
| 6.2  | 0 | 0 | 0 | 0 | 0 | 5 | 0 | 1 | 0 | <b>3.46</b> | 3.00 | 3.00           |      |
| 6.3  | 0 | 0 | 0 | 0 | 1 | 3 | 1 | 1 | 0 | <b>3.13</b> | 3.00 | 3.00           |      |
| 6.4  | 0 | 0 | 1 | 1 | 3 | 0 | 1 | 0 | 0 | <b>0.83</b> | 1.00 | 1.00           |      |
| 6.5  | 0 | 0 | 0 | 2 | 0 | 4 | 0 | 0 | 0 | <b>1.44</b> | 3.00 | 3.00           |      |
| 6.6  | 0 | 0 | 0 | 3 | 1 | 1 | 1 | 0 | 0 | <b>0.91</b> | 0.67 | 0.33           |      |
| 6.7  | 0 | 0 | 1 | 2 | 2 | 1 | 0 | 0 | 0 | <b>0.64</b> | 0.67 | 0.33/1.00      |      |
| 6.8  | 0 | 0 | 3 | 2 | 1 | 0 | 0 | 0 | 0 | <b>0.31</b> | 0.27 | 0.20           |      |
| 6.9  | 0 | 0 | 3 | 2 | 1 | 0 | 0 | 0 | 0 | <b>0.31</b> | 0.27 | 0.20           |      |
| 6.10 | 0 | 1 | 0 | 3 | 2 | 0 | 0 | 0 | 0 | <b>0.42</b> | 0.33 | 0.33           |      |
| 7.1  | 1 | 0 | 0 | 3 | 2 | 0 | 0 | 0 | 0 | <b>0.40</b> | 0.33 | 0.33           | 0.41 |
| 7.2  | 1 | 0 | 3 | 1 | 1 | 0 | 0 | 0 | 0 | <b>0.26</b> | 0.20 | 0.20           |      |
| 7.3  | 1 | 2 | 0 | 2 | 1 | 0 | 0 | 0 | 0 | <b>0.25</b> | 0.24 | 0.14/0.33      |      |
| 7.4  | 1 | 0 | 2 | 2 | 1 | 0 | 0 | 0 | 0 | <b>0.28</b> | 0.27 | 0.20/0.33      |      |
| 7.5  | 1 | 0 | 3 | 1 | 0 | 1 | 0 | 0 | 0 | <b>0.31</b> | 0.20 | 0.20           |      |
| 7.6  | 1 | 2 | 2 | 0 | 1 | 0 | 0 | 0 | 0 | <b>0.21</b> | 0.17 | 0.14/0.20      |      |
| 7.7  | 1 | 0 | 3 | 2 | 0 | 0 | 0 | 0 | 0 | <b>0.21</b> | 0.20 | 0.20           |      |
| 7.8  | 0 | 0 | 2 | 3 | 1 | 0 | 0 | 0 | 0 | <b>0.34</b> | 0.33 | 0.33           |      |
| 7.9  | 0 | 0 | 2 | 3 | 1 | 0 | 0 | 0 | 0 | <b>0.34</b> | 0.33 | 0.33           |      |
| 7.10 | 0 | 0 | 0 | 2 | 2 | 0 | 2 | 0 | 0 | <b>1.19</b> | 1.00 | 0.33/1.00/5.00 |      |
| 8.1  | 0 | 1 | 0 | 4 | 1 | 0 | 0 | 0 | 0 | <b>0.35</b> | 0.33 | 0.33           | 0.10 |
| 8.2  | 0 | 1 | 0 | 2 | 2 | 1 | 0 | 0 | 0 | <b>0.60</b> | 0.67 | 0.33/1.00      |      |
| 8.3  | 0 | 1 | 0 | 1 | 1 | 1 | 2 | 0 | 0 | <b>1.24</b> | 2.00 | 5.00           |      |
| 8.4  | 0 | 1 | 0 | 0 | 4 | 1 | 0 | 0 | 0 | <b>0.87</b> | 1.00 | 1.00           |      |
| 8.5  | 0 | 0 | 0 | 2 | 0 | 3 | 0 | 1 | 0 | <b>1.66</b> | 3.00 | 3.00           |      |
| 8.6  | 0 | 0 | 1 | 1 | 0 | 3 | 0 | 0 | 1 | <b>1.59</b> | 3.00 | 3.00           |      |
| 8.7  | 0 | 0 | 1 | 1 | 3 | 1 | 0 | 0 | 0 | <b>0.76</b> | 1.00 | 1.00           |      |
| 8.8  | 0 | 1 | 1 | 1 | 2 | 1 | 0 | 0 | 0 | <b>0.55</b> | 0.67 | 1.00           |      |
| 8.9  | 0 | 1 | 0 | 4 | 1 | 0 | 0 | 0 | 0 | <b>0.35</b> | 0.33 | 0.33           |      |
| 8.10 | 0 | 1 | 0 | 2 | 1 | 2 | 0 | 0 | 0 | <b>0.72</b> | 0.67 | 0.33/3.00      |      |
| 9.1  | 0 | 0 | 0 | 0 | 2 | 2 | 2 | 0 | 0 | <b>2.47</b> | 3.00 | 1.00/3.00/5.00 | 0.13 |
| 9.2  | 0 | 1 | 0 | 2 | 0 | 2 | 1 | 0 | 0 | <b>0.95</b> | 1.67 | 0.33/3.00      |      |
| 9.3  | 0 | 0 | 0 | 2 | 2 | 1 | 1 | 0 | 0 | <b>1.09</b> | 1.00 | 0.33/1.00      |      |
| 9.4  | 0 | 1 | 2 | 2 | 0 | 0 | 1 | 0 | 0 | <b>0.38</b> | 0.27 | 0.20/0.33      |      |
| 9.5  | 0 | 1 | 0 | 0 | 2 | 2 | 0 | 1 | 0 | <b>1.44</b> | 2.00 | 1.00/3.00      |      |
| 9.6  | 0 | 1 | 3 | 0 | 2 | 0 | 0 | 0 | 0 | <b>0.32</b> | 0.20 | 0.20           |      |
| 9.7  | 0 | 0 | 3 | 2 | 1 | 0 | 0 | 0 | 0 | <b>0.31</b> | 0.27 | 0.20           |      |
| 9.8  | 0 | 1 | 3 | 1 | 1 | 0 | 0 | 0 | 0 | <b>0.27</b> | 0.20 | 0.20           |      |
| 9.9  | 1 | 0 | 1 | 3 | 1 | 0 | 0 | 0 | 0 | <b>0.31</b> | 0.33 | 0.33           |      |
| 9.10 | 0 | 0 | 1 | 0 | 2 | 2 | 0 | 0 | 1 | <b>1.59</b> | 2.00 | 1.00/3.00      |      |
| 9.11 | 0 | 0 | 2 | 3 | 1 | 0 | 0 | 0 | 0 | <b>0.34</b> | 0.33 | 0.33           |      |
| 9.12 | 0 | 0 | 2 | 1 | 1 | 2 | 0 | 0 | 0 | <b>0.70</b> | 0.67 | 0.20/3.00      |      |
| 9.13 | 1 | 0 | 2 | 2 | 1 | 0 | 0 | 0 | 0 | <b>0.28</b> | 0.27 | 0.20/0.33      |      |



| 9.14         | 1                                | 0  | 1  | 0  | 1 | 2 | 1 | 0 | 0 | <b>1.00</b>    | 2.00   | 3.00        |                   |
|--------------|----------------------------------|----|----|----|---|---|---|---|---|----------------|--------|-------------|-------------------|
| 9.15         | 0                                | 0  | 0  | 0  | 3 | 0 | 3 | 0 | 0 | <b>2.24</b>    | 3.00   | 1.00/5.00   |                   |
| Question no. | Frequency of the indicated value |    |    |    |   |   |   |   |   | Geometric mean | Median | Modal value | Consistency index |
| [-]          | -9                               | -7 | -5 | -3 | 1 | 2 | 3 | 4 | 5 | [-]            | [-]    | [-]         | [-]               |
| 10.1         | 0                                | 0  | 0  | 0  | 0 | 1 | 1 | 1 | 3 | <b>3.80</b>    | 4.50   | 5.00        |                   |
| 10.2         | 0                                | 0  | 0  | 0  | 0 | 0 | 4 | 2 | 0 | <b>3.30</b>    | 3.00   | 3.00        |                   |
| Question no. | Frequency of the indicated value |    |    |    |   |   |   |   |   | Geometric mean | Median | Modal value | Consistency index |
| [-]          | -9                               | -7 | -5 | -3 | 1 | 2 | 3 | 4 | 5 | [-]            | [-]    | [-]         | [-]               |
| 11.1         | 0                                | 0  | 0  | 0  | 0 | 1 | 0 | 0 | 0 | <b>1.00</b>    | 1.00   | 1.00        |                   |
| 11.2         | 0                                | 0  | 0  | 0  | 0 | 2 | 0 | 0 | 0 | <b>1.00</b>    | 1.00   | 1.00        |                   |
| 11.3         | 0                                | 0  | 0  | 0  | 0 | 3 | 0 | 0 | 0 | <b>1.00</b>    | 1.00   | 1.00        |                   |
| 12.1         | 0                                | 0  | 0  | 0  | 0 | 0 | 0 | 0 | 0 | <b>n/a</b>     | n/a    | n/a         |                   |
| 12.2         | 0                                | 0  | 0  | 0  | 0 | 0 | 0 | 0 | 0 | <b>n/a</b>     | n/a    | n/a         |                   |
| 12.3         | 0                                | 0  | 0  | 0  | 0 | 0 | 0 | 0 | 0 | <b>n/a</b>     | n/a    | n/a         |                   |
| 12.4         | 0                                | 0  | 0  | 0  | 0 | 1 | 0 | 0 | 0 | <b>1.00</b>    | 1.00   | 1.00        |                   |
| 12.5         | 0                                | 0  | 0  | 0  | 0 | 4 | 0 | 0 | 0 | <b>1.00</b>    | 1.00   | 1.00        |                   |
| 12.6         | 0                                | 0  | 0  | 0  | 0 | 1 | 0 | 0 | 0 | <b>1.00</b>    | 1.00   | 1.00        |                   |
| 12.7         | 0                                | 0  | 0  | 0  | 0 | 0 | 0 | 0 | 0 | <b>n/a</b>     | n/a    | n/a         |                   |
| 12.8         | 0                                | 0  | 0  | 0  | 0 | 1 | 0 | 0 | 0 | <b>1.00</b>    | 1.00   | 1.00        |                   |
| 12.9         | 0                                | 0  | 0  | 0  | 0 | 0 | 0 | 0 | 0 | <b>n/a</b>     | n/a    | n/a         |                   |
| 12.10        | 0                                | 0  | 0  | 0  | 0 | 1 | 0 | 0 | 0 | <b>1.00</b>    | 1.00   | 1.00        |                   |
| 12.11        | 0                                | 0  | 0  | 0  | 0 | 3 | 0 | 0 | 0 | <b>1.00</b>    | 1.00   | 1.00        |                   |
| 12.12        | 0                                | 0  | 0  | 0  | 0 | 1 | 0 | 0 | 0 | <b>1.00</b>    | 1.00   | 1.00        |                   |
| 12.13        | 0                                | 0  | 0  | 0  | 0 | 1 | 0 | 0 | 0 | <b>1.00</b>    | 1.00   | 1.00        |                   |
| 12.14        | 0                                | 0  | 0  | 0  | 0 | 4 | 0 | 0 | 0 | <b>1.00</b>    | n/a    | n/a         |                   |
| 12.15        | 0                                | 0  | 0  | 0  | 0 | 0 | 0 | 0 | 0 | <b>n/a</b>     | n/a    | n/a         |                   |
| 12.16        | 0                                | 0  | 0  | 0  | 0 | 1 | 0 | 0 | 0 | <b>1.00</b>    | 1.00   | 1.00        |                   |
| 12.17        | 0                                | 0  | 0  | 0  | 0 | 0 | 0 | 0 | 0 | <b>n/a</b>     | n/a    | n/a         |                   |
| 12.18        | 0                                | 0  | 0  | 0  | 0 | 0 | 0 | 0 | 0 | <b>n/a</b>     | n/a    | n/a         |                   |
| 13.1         | 0                                | 0  | 0  | 0  | 0 | 0 | 0 | 0 | 0 | <b>n/a</b>     | n/a    | n/a         |                   |
| 13.2         | 0                                | 0  | 0  | 0  | 0 | 0 | 0 | 0 | 0 | <b>1.00</b>    | 1.00   | 1.00        |                   |
| 13.3         | 0                                | 0  | 0  | 0  | 0 | 2 | 0 | 0 | 0 | <b>1.00</b>    | 1.00   | 1.00        |                   |
| 13.4         | 0                                | 0  | 0  | 0  | 0 | 4 | 0 | 0 | 0 | <b>1.00</b>    | 1.00   | 1.00        |                   |
| 13.5         | 0                                | 0  | 0  | 0  | 0 | 0 | 0 | 0 | 0 | <b>n/a</b>     | n/a    | n/a         |                   |
| 13.6         | 0                                | 0  | 0  | 0  | 0 | 0 | 0 | 0 | 0 | <b>n/a</b>     | n/a    | n/a         |                   |

## Future user group

| Question no. | Frequency of the indicated value |      |      |      |    |   |   |   |   | Geometric mean | Median | Modal value | Consistency index |
|--------------|----------------------------------|------|------|------|----|---|---|---|---|----------------|--------|-------------|-------------------|
| [-]          | -9                               | -7   | -5   | -3   | 1  | 3 | 5 | 7 | 9 | [-]            | [-]    | [-]         | [-]               |
| [-]          | 0.11                             | 0.14 | 0.20 | 0.33 | 1  | 3 | 5 | 7 | 9 | [-]            | [-]    | [-]         | [-]               |
| 1.1          | 0                                | 0    | 0    | 0    | 2  | 0 | 0 | 0 | 0 | 1.00           | 1.00   | 1.00        |                   |
| 1.2          | 0                                | 0    | 0    | 0    | 5  | 0 | 0 | 0 | 0 | 1.00           | 1.00   | 1.00        |                   |
| 1.3          | 0                                | 0    | 0    | 0    | 3  | 0 | 0 | 0 | 0 | 1.00           | 1.00   | 1.00        |                   |
| 1.4          | 0                                | 0    | 0    | 0    | 0  | 0 | 0 | 0 | 0 | n/a            | n/a    | n/a         |                   |
| 1.5          | 0                                | 0    | 0    | 0    | 0  | 0 | 0 | 0 | 0 | n/a            | n/a    | n/a         |                   |
| 1.6          | 0                                | 0    | 0    | 0    | 3  | 0 | 0 | 0 | 0 | 1.00           | 1.00   | 1.00        |                   |
| 1.7          | 0                                | 0    | 0    | 0    | 3  | 0 | 0 | 0 | 0 | 1.00           | 1.00   | 1.00        |                   |
| 1.8          | 0                                | 0    | 0    | 0    | 16 | 0 | 0 | 0 | 0 | 1.00           | 1.00   | 1.00        |                   |
| 1.9          | 0                                | 0    | 0    | 0    | 1  | 0 | 0 | 0 | 0 | 1.00           | 1.00   | 1.00        |                   |
| Question no. | Frequency of the indicated value |      |      |      |    |   |   |   |   | Geometric mean | Median | Modal value | Consistency index |
| [-]          | -9                               | -7   | -5   | -3   | 1  | 2 | 3 | 4 | 5 | [-]            | [-]    | [-]         | [-]               |
| 2.1          | 0                                | 0    | 0    | 0    | 0  | 1 | 7 | 4 | 4 | 3.57           | 3.50   | 3.00        |                   |
| 2.2          | 0                                | 0    | 0    | 0    | 0  | 2 | 5 | 6 | 2 | 3.41           | 4.00   | 4.00        |                   |
| 2.3          | 0                                | 0    | 0    | 0    | 0  | 2 | 4 | 2 | 0 | 2.91           | 3.00   | 3.00        |                   |
| 2.4          | 0                                | 0    | 0    | 0    | 0  | 2 | 0 | 2 | 0 | 2.83           | 3.00   | 2.00/4.00   |                   |
| 2.5          | 0                                | 0    | 0    | 0    | 1  | 0 | 2 | 1 | 0 | 2.45           | 3.00   | 3.00        |                   |
| Question no. | Frequency of the indicated value |      |      |      |    |   |   |   |   | Geometric mean | Median | Modal value | Consistency index |
| [-]          | -9                               | -7   | -5   | -3   | 1  | 3 | 5 | 7 | 9 | [-]            | [-]    | [-]         | [-]               |
| [-]          | 0.11                             | 0.14 | 0.20 | 0.33 | 1  | 3 | 5 | 7 | 9 | [-]            | [-]    | [-]         | [-]               |
| 3.1          | 0                                | 2    | 3    | 5    | 2  | 3 | 1 | 0 | 0 | 0.56           | 0.33   | 0.33        | 0.15              |
| 3.2          | 0                                | 1    | 5    | 6    | 2  | 1 | 1 | 0 | 0 | 0.42           | 0.33   | 0.33        |                   |
| 3.3          | 0                                | 0    | 1    | 3    | 3  | 4 | 3 | 1 | 1 | 1.70           | 3.00   | 3.00        |                   |
| 3.4          | 0                                | 0    | 1    | 3    | 4  | 5 | 1 | 1 | 1 | 1.49           | 2.00   | 3.00        |                   |
| 3.5          | 0                                | 0    | 4    | 6    | 3  | 3 | 0 | 0 | 0 | 0.54           | 0.33   | 0.33        |                   |
| 3.6          | 0                                | 0    | 1    | 1    | 4  | 5 | 3 | 1 | 1 | 2.09           | 3.00   | 3.00        |                   |
| 3.7          | 0                                | 0    | 0    | 2    | 4  | 5 | 3 | 0 | 2 | 2.19           | 3.00   | 3.00        |                   |
| 3.8          | 0                                | 0    | 0    | 2    | 0  | 7 | 4 | 1 | 2 | 3.13           | 3.00   | 3.00        |                   |
| 3.9          | 0                                | 0    | 0    | 2    | 1  | 6 | 5 | 0 | 2 | 2.86           | 3.00   | 3.00        |                   |
| 3.10         | 0                                | 0    | 1    | 1    | 10 | 3 | 1 | 0 | 0 | 1.15           | 1.00   | 1.00        |                   |
| 4.1          | 0                                | 0    | 1    | 2    | 1  | 7 | 3 | 1 | 1 | 2.23           | 3.00   | 3.00        | 0.10              |
| 4.2          | 0                                | 0    | 0    | 2    | 3  | 9 | 1 | 0 | 1 | 2.05           | 3.00   | 3.00        |                   |
| 4.3          | 0                                | 0    | 0    | 2    | 3  | 7 | 2 | 2 | 0 | 2.20           | 3.00   | 3.00        |                   |
| 4.4          | 0                                | 0    | 0    | 2    | 3  | 8 | 2 | 1 | 0 | 2.09           | 3.00   | 3.00        |                   |
| 4.5          | 0                                | 1    | 5    | 5    | 1  | 2 | 2 | 0 | 0 | 0.53           | 0.33   | 0.20/0.33   |                   |
| 4.6          | 0                                | 0    | 3    | 2    | 6  | 4 | 1 | 0 | 0 | 0.94           | 1.00   | 1.00        |                   |
| 4.7          | 0                                | 0    | 3    | 2    | 5  | 5 | 0 | 1 | 0 | 1.03           | 1.00   | 1.00/3.00   |                   |
| 4.8          | 0                                | 0    | 0    | 1    | 5  | 9 | 0 | 1 | 0 | 1.96           | 3.00   | 3.00        |                   |
| 4.9          | 0                                | 1    | 1    | 1    | 3  | 6 | 4 | 0 | 0 | 1.69           | 3.00   | 3.00        |                   |
| 4.10         | 0                                | 0    | 2    | 5    | 9  | 0 | 0 | 0 | 0 | 0.58           | 1.00   | 1.00        |                   |
| 5.1          | 0                                | 0    | 5    | 2    | 4  | 4 | 1 | 0 | 0 | 0.77           | 1.00   | 0.20        | 0.13              |

|      |   |   |   |    |    |   |   |   |   |             |      |                |      |
|------|---|---|---|----|----|---|---|---|---|-------------|------|----------------|------|
| 5.2  | 0 | 0 | 5 | 7  | 2  | 2 | 0 | 0 | 0 | <b>0.43</b> | 0.33 | 0.33           |      |
| 5.3  | 0 | 0 | 1 | 5  | 3  | 6 | 0 | 1 | 0 | <b>1.09</b> | 1.00 | 3.00           |      |
| 5.4  | 0 | 0 | 0 | 4  | 5  | 2 | 5 | 0 | 0 | <b>1.44</b> | 1.00 | 1.00/5.00      |      |
| 5.5  | 0 | 0 | 1 | 9  | 4  | 1 | 1 | 0 | 0 | <b>0.58</b> | 0.33 | 0.33           |      |
| 5.6  | 0 | 0 | 0 | 2  | 6  | 7 | 1 | 0 | 0 | <b>1.56</b> | 2.00 | 3.00           |      |
| 5.7  | 0 | 0 | 0 | 1  | 5  | 7 | 3 | 0 | 0 | <b>2.04</b> | 3.00 | 3.00           |      |
| 5.8  | 0 | 0 | 0 | 0  | 2  | 8 | 6 | 0 | 0 | <b>3.17</b> | 3.00 | 3.00           |      |
| 5.9  | 0 | 0 | 0 | 0  | 3  | 7 | 6 | 0 | 0 | <b>2.96</b> | 3.00 | 3.00           |      |
| 5.10 | 0 | 0 | 0 | 0  | 10 | 2 | 4 | 0 | 0 | <b>1.72</b> | 1.00 | 1.00           |      |
| 6.1  | 0 | 1 | 4 | 2  | 2  | 6 | 1 | 0 | 0 | <b>0.86</b> | 1.00 | 3.00           |      |
| 6.2  | 0 | 0 | 0 | 3  | 4  | 4 | 5 | 0 | 0 | <b>1.77</b> | 3.00 | 5.00           |      |
| 6.3  | 0 | 0 | 0 | 5  | 3  | 3 | 3 | 1 | 1 | <b>1.53</b> | 2.00 | 0.33           |      |
| 6.4  | 0 | 1 | 0 | 4  | 6  | 4 | 1 | 0 | 0 | <b>0.98</b> | 1.00 | 1.00           |      |
| 6.5  | 0 | 1 | 0 | 1  | 5  | 5 | 4 | 0 | 0 | <b>1.74</b> | 3.00 | 1.00/3.00      |      |
| 6.6  | 0 | 0 | 0 | 0  | 6  | 5 | 5 | 0 | 0 | <b>2.33</b> | 3.00 | 1.00           | 0.08 |
| 6.7  | 0 | 0 | 1 | 7  | 4  | 1 | 3 | 0 | 0 | <b>0.81</b> | 0.67 | 0.33           |      |
| 6.8  | 0 | 0 | 1 | 1  | 6  | 4 | 4 | 0 | 0 | <b>1.66</b> | 2.00 | 1.00           |      |
| 6.9  | 0 | 0 | 0 | 11 | 4  | 1 | 0 | 0 | 0 | <b>0.50</b> | 0.33 | 0.33           |      |
| 6.10 | 0 | 1 | 3 | 5  | 6  | 1 | 0 | 0 | 0 | <b>0.50</b> | 0.33 | 1.00           |      |
| 7.1  | 0 | 0 | 0 | 4  | 8  | 3 | 0 | 1 | 0 | <b>1.05</b> | 1.00 | 1.00           |      |
| 7.2  | 0 | 0 | 3 | 6  | 6  | 1 | 0 | 0 | 0 | <b>0.52</b> | 0.33 | 0.33/1.00      |      |
| 7.3  | 0 | 3 | 0 | 8  | 4  | 0 | 1 | 0 | 0 | <b>0.44</b> | 0.33 | 0.33           |      |
| 7.4  | 0 | 2 | 1 | 10 | 2  | 1 | 0 | 0 | 0 | <b>0.38</b> | 0.33 | 0.33           |      |
| 7.5  | 0 | 0 | 6 | 7  | 3  | 0 | 0 | 0 | 0 | <b>0.34</b> | 0.33 | 0.33           |      |
| 7.6  | 0 | 2 | 3 | 8  | 3  | 0 | 0 | 0 | 0 | <b>0.33</b> | 0.33 | 0.33           | 0.15 |
| 7.7  | 0 | 1 | 3 | 8  | 3  | 1 | 0 | 0 | 0 | <b>0.40</b> | 0.33 | 0.33           |      |
| 7.8  | 0 | 0 | 2 | 5  | 7  | 1 | 1 | 0 | 0 | <b>0.69</b> | 1.00 | 1.00           |      |
| 7.9  | 0 | 1 | 0 | 4  | 10 | 1 | 0 | 0 | 0 | <b>0.72</b> | 1.00 | 1.00           |      |
| 7.10 | 0 | 0 | 1 | 4  | 9  | 1 | 1 | 0 | 0 | <b>0.81</b> | 1.00 | 1.00           |      |
| 8.1  | 0 | 0 | 4 | 4  | 3  | 5 | 0 | 0 | 0 | <b>0.72</b> | 0.67 | 3.00           |      |
| 8.2  | 0 | 0 | 4 | 6  | 4  | 2 | 0 | 0 | 0 | <b>0.51</b> | 0.33 | 0.33           |      |
| 8.3  | 0 | 0 | 0 | 8  | 3  | 2 | 3 | 0 | 0 | <b>0.90</b> | 0.67 | 0.33           |      |
| 8.4  | 0 | 0 | 0 | 9  | 6  | 1 | 0 | 0 | 0 | <b>0.58</b> | 0.33 | 0.33           |      |
| 8.5  | 0 | 0 | 2 | 4  | 5  | 4 | 1 | 0 | 0 | <b>0.90</b> | 1.00 | 1.00           |      |
| 8.6  | 0 | 0 | 1 | 2  | 6  | 2 | 4 | 1 | 0 | <b>1.53</b> | 1.00 | 1.00           | 0.04 |
| 8.7  | 0 | 0 | 1 | 4  | 7  | 3 | 0 | 1 | 0 | <b>0.95</b> | 1.00 | 1.00           |      |
| 8.8  | 0 | 0 | 0 | 3  | 7  | 5 | 0 | 1 | 0 | <b>1.30</b> | 1.00 | 1.00           |      |
| 8.9  | 0 | 0 | 0 | 5  | 8  | 2 | 0 | 1 | 0 | <b>0.92</b> | 1.00 | 1.00           |      |
| 8.10 | 0 | 0 | 1 | 7  | 8  | 0 | 0 | 0 | 0 | <b>0.56</b> | 0.67 | 1.00           |      |
| 9.1  | 0 | 0 | 0 | 5  | 3  | 4 | 3 | 1 | 0 | <b>1.43</b> | 2.00 | 0.33           |      |
| 9.2  | 0 | 0 | 4 | 2  | 4  | 4 | 2 | 0 | 0 | <b>0.94</b> | 1.00 | 0.20/1.00/3.00 |      |
| 9.3  | 0 | 0 | 1 | 3  | 1  | 6 | 3 | 2 | 0 | <b>1.92</b> | 3.00 | 3.00           |      |
| 9.4  | 0 | 1 | 6 | 5  | 2  | 2 | 0 | 0 | 0 | <b>0.39</b> | 0.33 | 0.20           |      |
| 9.5  | 0 | 0 | 6 | 5  | 3  | 2 | 0 | 0 | 0 | <b>0.45</b> | 0.33 | 0.20           |      |
| 9.6  | 0 | 0 | 4 | 2  | 8  | 2 | 0 | 0 | 0 | <b>0.67</b> | 1.00 | 1.00           |      |
| 9.7  | 0 | 0 | 0 | 4  | 5  | 5 | 1 | 1 | 0 | <b>1.34</b> | 1.00 | 1.00/3.00      |      |
| 9.8  | 0 | 0 | 1 | 12 | 2  | 1 | 0 | 0 | 0 | <b>0.42</b> | 0.33 | 0.33           | 0.09 |
| 9.9  | 0 | 0 | 4 | 9  | 2  | 0 | 1 | 0 | 0 | <b>0.40</b> | 0.33 | 0.33           |      |
| 9.10 | 0 | 0 | 0 | 3  | 3  | 5 | 4 | 0 | 1 | <b>1.97</b> | 3.00 | 3.00           |      |
| 9.11 | 0 | 0 | 0 | 12 | 3  | 1 | 0 | 0 | 0 | <b>0.47</b> | 0.33 | 0.33           |      |
| 9.12 | 0 | 0 | 0 | 12 | 3  | 0 | 1 | 0 | 0 | <b>0.49</b> | 0.33 | 0.33           |      |
| 9.13 | 0 | 2 | 9 | 3  | 0  | 1 | 1 | 0 | 0 | <b>0.31</b> | 0.20 | 0.20           |      |

| 9.14         | 0                                | 2  | 8  | 4  | 1  | 1 | 0 | 0 | 0 | 0.29           | 0.20   | 0.20        |                   |
|--------------|----------------------------------|----|----|----|----|---|---|---|---|----------------|--------|-------------|-------------------|
| 9.15         | 0                                | 0  | 1  | 1  | 9  | 5 | 0 | 0 | 0 | 1.19           | 1.00   | 1.00        |                   |
| Question no. | Frequency of the indicated value |    |    |    |    |   |   |   |   | Geometric mean | Median | Modal value | Consistency index |
| [-]          | -9                               | -7 | -5 | -3 | 1  | 2 | 3 | 4 | 5 | [-]            | [-]    | [-]         | [-]               |
| 10.1         | 0                                | 0  | 0  | 0  | 0  | 2 | 7 | 6 | 1 | 3.28           | 3.00   | 3.00        |                   |
| 10.2         | 0                                | 0  | 0  | 0  | 0  | 2 | 5 | 9 | 0 | 3.35           | 4.00   | 4.00        |                   |
| Question no. | Frequency of the indicated value |    |    |    |    |   |   |   |   | Geometric mean | Median | Modal value | Consistency index |
| [-]          | -9                               | -7 | -5 | -3 | 1  | 2 | 3 | 4 | 5 | [-]            | [-]    | [-]         | [-]               |
| 11.1         | 0                                | 0  | 0  | 0  | 14 | 0 | 0 | 0 | 0 | 1.00           | 1.00   | 1.00        |                   |
| 11.2         | 0                                | 0  | 0  | 0  | 2  | 0 | 0 | 0 | 0 | 1.00           | 1.00   | 1.00        |                   |
| 11.3         | 0                                | 0  | 0  | 0  | 0  | 0 | 0 | 0 | 0 | n/a            | n/a    | n/a         |                   |
| 12.1         | 0                                | 0  | 0  | 0  | 0  | 0 | 0 | 0 | 0 | n/a            | n/a    | n/a         |                   |
| 12.2         | 0                                | 0  | 0  | 0  | 1  | 0 | 0 | 0 | 0 | 1.00           | 1.00   | 1.00        |                   |
| 12.3         | 0                                | 0  | 0  | 0  | 2  | 0 | 0 | 0 | 0 | 1.00           | 1.00   | 1.00        |                   |
| 12.4         | 0                                | 0  | 0  | 0  | 0  | 0 | 0 | 0 | 0 | n/a            | n/a    | n/a         |                   |
| 12.5         | 0                                | 0  | 0  | 0  | 13 | 0 | 0 | 0 | 0 | 1.00           | 1.00   | 1.00        |                   |
| 12.6         | 0                                | 0  | 0  | 0  | 0  | 0 | 0 | 0 | 0 | n/a            | n/a    | n/a         |                   |
| 12.7         | 0                                | 0  | 0  | 0  | 5  | 0 | 0 | 0 | 0 | 1.00           | 1.00   | 1.00        |                   |
| 12.8         | 0                                | 0  | 0  | 0  | 6  | 0 | 0 | 0 | 0 | 1.00           | 1.00   | 1.00        |                   |
| 12.9         | 0                                | 0  | 0  | 0  | 2  | 0 | 0 | 0 | 0 | 1.00           | 1.00   | 1.00        |                   |
| 12.10        | 0                                | 0  | 0  | 0  | 2  | 0 | 0 | 0 | 0 | 1.00           | 1.00   | 1.00        |                   |
| 12.11        | 0                                | 0  | 0  | 0  | 1  | 0 | 0 | 0 | 0 | 1.00           | 1.00   | 1.00        |                   |
| 12.12        | 0                                | 0  | 0  | 0  | 0  | 0 | 0 | 0 | 0 | n/a            | n/a    | n/a         |                   |
| 12.13        | 0                                | 0  | 0  | 0  | 1  | 0 | 0 | 0 | 0 | 1.00           | 1.00   | 1.00        |                   |
| 12.14        | 0                                | 0  | 0  | 0  | 0  | 0 | 0 | 0 | 0 | n/a            | n/a    | n/a         |                   |
| 12.15        | 0                                | 0  | 0  | 0  | 2  | 0 | 0 | 0 | 0 | 1.00           | 1.00   | 1.00        |                   |
| 12.16        | 0                                | 0  | 0  | 0  | 13 | 0 | 0 | 0 | 0 | 1.00           | 1.00   | 1.00        |                   |
| 12.17        | 0                                | 0  | 0  | 0  | 0  | 0 | 0 | 0 | 0 | n/a            | n/a    | n/a         |                   |
| 12.18        | 0                                | 0  | 0  | 0  | 0  | 0 | 0 | 0 | 0 | n/a            | n/a    | n/a         |                   |
| 13.1         | 0                                | 0  | 0  | 0  | 0  | 0 | 0 | 0 | 0 | n/a            | n/a    | n/a         |                   |
| 13.2         | 0                                | 0  | 0  | 0  | 0  | 0 | 0 | 0 | 0 | n/a            | n/a    | n/a         |                   |
| 13.3         | 0                                | 0  | 0  | 0  | 12 | 0 | 0 | 0 | 0 | 1.00           | 1.00   | 1.00        |                   |
| 13.4         | 0                                | 0  | 0  | 0  | 4  | 0 | 0 | 0 | 0 | 1.00           | 1.00   | 1.00        |                   |
| 13.5         | 0                                | 0  | 0  | 0  | 0  | 0 | 0 | 0 | 0 | n/a            | n/a    | n/a         |                   |
| 13.6         | 0                                | 0  | 0  | 0  | 0  | 0 | 0 | 0 | 0 | n/a            | n/a    | n/a         |                   |

## Current /Future user group

| Question no. | Frequency of the indicated value |      |      |      |    |    |   |   |   | Geometric mean | Median | Modal value | Consistency index |
|--------------|----------------------------------|------|------|------|----|----|---|---|---|----------------|--------|-------------|-------------------|
| [-]          | -9                               | -7   | -5   | -3   | 1  | 3  | 5 | 7 | 9 | [-]            | [-]    | [-]         | [-]               |
| [-]          | 0.11                             | 0.14 | 0.20 | 0.33 | 1  | 3  | 5 | 7 | 9 | [-]            | [-]    | [-]         | [-]               |
| 1.1          | 0                                | 0    | 0    | 0    | 3  | 0  | 0 | 0 | 0 | 1.00           | 1.00   | 1.00        |                   |
| 1.2          | 0                                | 0    | 0    | 0    | 5  | 0  | 0 | 0 | 0 | 1.00           | 1.00   | 1.00        |                   |
| 1.3          | 0                                | 0    | 0    | 0    | 3  | 0  | 0 | 0 | 0 | 1.00           | 1.00   | 1.00        |                   |
| 1.4          | 0                                | 0    | 0    | 0    | 1  | 0  | 0 | 0 | 0 | n/a            | n/a    | n/a         |                   |
| 1.5          | 0                                | 0    | 0    | 0    | 6  | 0  | 0 | 0 | 0 | n/a            | n/a    | n/a         |                   |
| 1.6          | 0                                | 0    | 0    | 0    | 5  | 0  | 0 | 0 | 0 | 1.00           | 1.00   | 1.00        |                   |
| 1.7          | 0                                | 0    | 0    | 0    | 3  | 0  | 0 | 0 | 0 | 1.00           | 1.00   | 1.00        |                   |
| 1.8          | 0                                | 0    | 0    | 0    | 16 | 0  | 0 | 0 | 0 | 1.00           | 1.00   | 1.00        |                   |
| 1.9          | 0                                | 0    | 0    | 0    | 1  | 0  | 0 | 0 | 0 | 1.00           | 1.00   | 1.00        |                   |
| Question no. | Frequency of the indicated value |      |      |      |    |    |   |   |   | Geometric mean | Median | Modal value | Consistency index |
| [-]          | -9                               | -7   | -5   | -3   | 1  | 2  | 3 | 4 | 5 | [-]            | [-]    | [-]         | [-]               |
| 2.1          | 0                                | 0    | 0    | 0    | 0  | 1  | 7 | 6 | 8 | 3.84           | 3.50   | 3.00        |                   |
| 2.2          | 0                                | 0    | 0    | 0    | 1  | 2  | 5 | 9 | 2 | 3.28           | 4.00   | 4.00        |                   |
| 2.3          | 0                                | 0    | 0    | 0    | 1  | 2  | 6 | 2 | 0 | 2.66           | 3.00   | 3.00        |                   |
| 2.4          | 0                                | 0    | 0    | 0    | 1  | 2  | 2 | 2 | 0 | 2.48           | 3.00   | 2.00/4.00   |                   |
| 2.5          | 0                                | 0    | 0    | 0    | 2  | 0  | 4 | 1 | 0 | 2.28           | 3.00   | 3.00        |                   |
| Question no. | Frequency of the indicated value |      |      |      |    |    |   |   |   | Geometric mean | Median | Modal value | Consistency index |
| [-]          | -9                               | -7   | -5   | -3   | 1  | 3  | 5 | 7 | 9 | [-]            | [-]    | [-]         | [-]               |
| [-]          | 0.11                             | 0.14 | 0.20 | 0.33 | 1  | 3  | 5 | 7 | 9 | [-]            | [-]    | [-]         | [-]               |
| 3.1          | 1                                | 3    | 5    | 5    | 3  | 4  | 1 | 0 | 0 | 0.49           | 0.33   | 0.33        | 0.16              |
| 3.2          | 1                                | 1    | 6    | 6    | 5  | 2  | 1 | 0 | 0 | 0.47           | 0.33   | 0.33        |                   |
| 3.3          | 0                                | 0    | 2    | 3    | 5  | 4  | 6 | 1 | 1 | 1.70           | 3.00   | 3.00        |                   |
| 3.4          | 1                                | 0    | 1    | 4    | 5  | 7  | 2 | 1 | 1 | 1.37           | 2.00   | 3.00        |                   |
| 3.5          | 0                                | 0    | 4    | 7    | 6  | 5  | 0 | 0 | 0 | 0.68           | 0.33   | 0.33        |                   |
| 3.6          | 0                                | 0    | 1    | 1    | 6  | 5  | 6 | 1 | 2 | 2.35           | 3.00   | 3.00        |                   |
| 3.7          | 0                                | 0    | 0    | 2    | 6  | 6  | 6 | 0 | 2 | 2.31           | 3.00   | 3.00        |                   |
| 3.8          | 0                                | 0    | 0    | 2    | 2  | 7  | 7 | 1 | 3 | 3.16           | 3.00   | 3.00        |                   |
| 3.9          | 0                                | 0    | 0    | 2    | 2  | 7  | 9 | 0 | 2 | 3.03           | 3.00   | 3.00        |                   |
| 3.10         | 1                                | 2    | 2    | 2    | 11 | 3  | 1 | 0 | 0 | 0.74           | 1.00   | 1.00        |                   |
| 4.1          | 0                                | 1    | 1    | 2    | 1  | 8  | 4 | 4 | 1 | 2.42           | 3.00   | 3.00        | 0.10              |
| 4.2          | 0                                | 0    | 1    | 2    | 3  | 10 | 2 | 2 | 2 | 2.34           | 3.00   | 3.00        |                   |
| 4.3          | 0                                | 0    | 1    | 2    | 3  | 9  | 4 | 2 | 1 | 2.33           | 3.00   | 3.00        |                   |
| 4.4          | 0                                | 0    | 1    | 2    | 4  | 9  | 2 | 4 | 0 | 2.17           | 3.00   | 3.00        |                   |
| 4.5          | 0                                | 3    | 5    | 6    | 1  | 4  | 2 | 0 | 1 | 0.62           | 0.33   | 0.20/0.33   |                   |
| 4.6          | 0                                | 1    | 3    | 5    | 8  | 4  | 1 | 0 | 0 | 0.75           | 1.00   | 1.00        |                   |
| 4.7          | 0                                | 1    | 5    | 4    | 6  | 5  | 0 | 1 | 0 | 0.73           | 1.00   | 1.00/3.00   |                   |
| 4.8          | 1                                | 0    | 0    | 3    | 7  | 9  | 1 | 1 | 0 | 1.44           | 3.00   | 3.00        |                   |
| 4.9          | 1                                | 1    | 3    | 3    | 3  | 6  | 5 | 0 | 0 | 1.11           | 3.00   | 3.00        |                   |
| 4.10         | 0                                | 0    | 2    | 9    | 11 | 0  | 0 | 0 | 0 | 0.55           | 1.00   | 1.00        |                   |
| 5.1          | 0                                | 1    | 6    | 5    | 5  | 4  | 1 | 0 | 0 | 0.60           | 1.00   | 0.20        | 0.13              |

|      |   |   |    |    |    |    |   |   |   |             |      |                |      |
|------|---|---|----|----|----|----|---|---|---|-------------|------|----------------|------|
| 5.2  | 0 | 1 | 5  | 10 | 3  | 3  | 0 | 0 | 0 | <b>0.45</b> | 0.33 | 0.33           |      |
| 5.3  | 0 | 1 | 3  | 5  | 6  | 6  | 0 | 1 | 0 | <b>0.84</b> | 1.00 | 3.00           |      |
| 5.4  | 0 | 0 | 1  | 6  | 6  | 4  | 5 | 0 | 0 | <b>1.21</b> | 1.00 | 1.00/5.00      |      |
| 5.5  | 0 | 0 | 2  | 11 | 6  | 2  | 1 | 0 | 0 | <b>0.59</b> | 0.33 | 0.33           |      |
| 5.6  | 0 | 0 | 0  | 2  | 8  | 11 | 1 | 0 | 0 | <b>1.69</b> | 2.00 | 3.00           |      |
| 5.7  | 0 | 0 | 0  | 1  | 9  | 9  | 3 | 0 | 0 | <b>1.86</b> | 3.00 | 3.00           |      |
| 5.8  | 0 | 0 | 0  | 0  | 2  | 13 | 6 | 1 | 0 | <b>3.24</b> | 3.00 | 3.00           |      |
| 5.9  | 0 | 0 | 0  | 0  | 3  | 12 | 7 | 0 | 0 | <b>3.04</b> | 3.00 | 3.00           |      |
| 5.10 | 0 | 0 | 0  | 0  | 13 | 5  | 4 | 0 | 0 | <b>1.72</b> | 1.00 | 1.00           |      |
| 6.1  | 0 | 1 | 4  | 3  | 2  | 9  | 3 | 0 | 0 | <b>1.15</b> | 1.00 | 3.00           | 0.08 |
| 6.2  | 0 | 0 | 0  | 3  | 4  | 9  | 5 | 1 | 0 | <b>2.13</b> | 3.00 | 5.00           |      |
| 6.3  | 0 | 0 | 0  | 5  | 4  | 6  | 4 | 2 | 1 | <b>1.86</b> | 2.00 | 0.33           |      |
| 6.4  | 0 | 1 | 1  | 5  | 9  | 4  | 2 | 0 | 0 | <b>0.94</b> | 1.00 | 1.00           |      |
| 6.5  | 0 | 1 | 0  | 3  | 5  | 9  | 4 | 0 | 0 | <b>1.65</b> | 3.00 | 1.00/3.00      |      |
| 6.6  | 0 | 0 | 0  | 3  | 7  | 6  | 6 | 0 | 0 | <b>1.80</b> | 3.00 | 1.00           |      |
| 6.7  | 0 | 0 | 2  | 9  | 6  | 2  | 3 | 0 | 0 | <b>0.76</b> | 0.67 | 0.33           |      |
| 6.8  | 0 | 0 | 4  | 3  | 7  | 4  | 4 | 0 | 0 | <b>1.05</b> | 2.00 | 1.00           |      |
| 6.9  | 0 | 0 | 3  | 13 | 5  | 1  | 0 | 0 | 0 | <b>0.44</b> | 0.33 | 0.33           |      |
| 6.10 | 0 | 2 | 3  | 8  | 8  | 1  | 0 | 0 | 0 | <b>0.47</b> | 0.33 | 1.00           |      |
| 7.1  | 1 | 0 | 0  | 7  | 10 | 3  | 0 | 1 | 0 | <b>0.81</b> | 1.00 | 1.00           | 0.20 |
| 7.2  | 1 | 0 | 6  | 7  | 7  | 1  | 0 | 0 | 0 | <b>0.43</b> | 0.33 | 0.33/1.00      |      |
| 7.3  | 1 | 5 | 0  | 10 | 5  | 0  | 1 | 0 | 0 | <b>0.38</b> | 0.33 | 0.33           |      |
| 7.4  | 1 | 2 | 3  | 12 | 3  | 1  | 0 | 0 | 0 | <b>0.35</b> | 0.33 | 0.33           |      |
| 7.5  | 1 | 0 | 9  | 8  | 3  | 1  | 0 | 0 | 0 | <b>0.33</b> | 0.33 | 0.33           |      |
| 7.6  | 1 | 4 | 5  | 8  | 4  | 0  | 0 | 0 | 0 | <b>0.30</b> | 0.33 | 0.33           |      |
| 7.7  | 1 | 1 | 6  | 10 | 3  | 1  | 0 | 0 | 0 | <b>0.34</b> | 0.33 | 0.33           |      |
| 7.8  | 0 | 0 | 4  | 8  | 8  | 1  | 1 | 0 | 0 | <b>0.57</b> | 1.00 | 1.00           |      |
| 7.9  | 0 | 1 | 2  | 7  | 11 | 1  | 0 | 0 | 0 | <b>0.59</b> | 1.00 | 1.00           |      |
| 7.10 | 0 | 0 | 1  | 6  | 11 | 1  | 3 | 0 | 0 | <b>0.90</b> | 1.00 | 1.00           |      |
| 8.1  | 0 | 1 | 4  | 8  | 4  | 5  | 0 | 0 | 0 | <b>0.59</b> | 0.67 | 3.00           | 0.04 |
| 8.2  | 0 | 1 | 4  | 8  | 6  | 3  | 0 | 0 | 0 | <b>0.53</b> | 0.33 | 0.33           |      |
| 8.3  | 0 | 1 | 0  | 9  | 4  | 3  | 5 | 0 | 0 | <b>0.98</b> | 0.67 | 0.33           |      |
| 8.4  | 0 | 1 | 0  | 9  | 10 | 2  | 0 | 0 | 0 | <b>0.65</b> | 0.33 | 0.33           |      |
| 8.5  | 0 | 0 | 2  | 6  | 5  | 7  | 1 | 1 | 0 | <b>1.07</b> | 1.00 | 1.00           |      |
| 8.6  | 0 | 0 | 2  | 3  | 6  | 5  | 4 | 1 | 1 | <b>1.54</b> | 1.00 | 1.00           |      |
| 8.7  | 0 | 0 | 2  | 5  | 10 | 4  | 0 | 1 | 0 | <b>0.90</b> | 1.00 | 1.00           |      |
| 8.8  | 0 | 1 | 1  | 4  | 9  | 6  | 0 | 1 | 0 | <b>1.03</b> | 1.00 | 1.00           |      |
| 8.9  | 0 | 1 | 0  | 9  | 9  | 2  | 0 | 1 | 0 | <b>0.70</b> | 1.00 | 1.00           |      |
| 8.10 | 0 | 1 | 1  | 9  | 9  | 2  | 0 | 0 | 0 | <b>0.60</b> | 0.67 | 1.00           |      |
| 9.1  | 0 | 0 | 0  | 5  | 5  | 6  | 5 | 1 | 0 | <b>1.66</b> | 2.00 | 0.33           | 0.09 |
| 9.2  | 0 | 1 | 4  | 4  | 4  | 6  | 3 | 0 | 0 | <b>0.94</b> | 1.00 | 0.20/1.00/3.00 |      |
| 9.3  | 0 | 0 | 1  | 5  | 3  | 7  | 4 | 2 | 0 | <b>1.64</b> | 3.00 | 3.00           |      |
| 9.4  | 0 | 2 | 8  | 7  | 2  | 2  | 1 | 0 | 0 | <b>0.39</b> | 0.33 | 0.20           |      |
| 9.5  | 0 | 1 | 6  | 5  | 5  | 4  | 0 | 1 | 0 | <b>0.61</b> | 0.33 | 0.20           |      |
| 9.6  | 0 | 1 | 7  | 2  | 10 | 2  | 0 | 0 | 0 | <b>0.55</b> | 1.00 | 1.00           |      |
| 9.7  | 0 | 0 | 3  | 6  | 6  | 5  | 1 | 1 | 0 | <b>0.90</b> | 1.00 | 1.00/3.00      |      |
| 9.8  | 0 | 1 | 4  | 13 | 3  | 1  | 0 | 0 | 0 | <b>0.38</b> | 0.33 | 0.33           |      |
| 9.9  | 1 | 0 | 5  | 12 | 3  | 0  | 1 | 0 | 0 | <b>0.37</b> | 0.33 | 0.33           |      |
| 9.10 | 0 | 0 | 1  | 3  | 5  | 7  | 4 | 0 | 2 | <b>1.86</b> | 3.00 | 3.00           |      |
| 9.11 | 0 | 0 | 2  | 15 | 4  | 1  | 0 | 0 | 0 | <b>0.43</b> | 0.33 | 0.33           |      |
| 9.12 | 0 | 0 | 2  | 13 | 4  | 2  | 1 | 0 | 0 | <b>0.54</b> | 0.33 | 0.33           |      |
| 9.13 | 1 | 2 | 11 | 5  | 1  | 1  | 1 | 0 | 0 | <b>0.30</b> | 0.20 | 0.20           |      |

| 9.14         | 1                                | 2  | 9  | 4  | 2  | 3 | 1 | 0  | 0 | 0.40           | 0.20   | 0.20        |                   |
|--------------|----------------------------------|----|----|----|----|---|---|----|---|----------------|--------|-------------|-------------------|
| 9.15         | 0                                | 0  | 1  | 1  | 12 | 5 | 3 | 0  | 0 | 1.41           | 1.00   | 1.00        |                   |
| Question no. | Frequency of the indicated value |    |    |    |    |   |   |    |   | Geometric mean | Median | Modal value | Consistency index |
| [-]          | -9                               | -7 | -5 | -3 | 1  | 2 | 3 | 4  | 5 | [-]            | [-]    | [-]         | [-]               |
| 10.1         | 0                                | 0  | 0  | 0  | 0  | 3 | 8 | 7  | 4 | 3.41           | 3.00   | 3.00        |                   |
| 10.2         | 0                                | 0  | 0  | 0  | 0  | 2 | 9 | 11 | 0 | 3.34           | 4.00   | 4.00        |                   |
| Question no. | Frequency of the indicated value |    |    |    |    |   |   |    |   | Geometric mean | Median | Modal value | Consistency index |
| [-]          | -9                               | -7 | -5 | -3 | 1  | 2 | 3 | 4  | 5 | [-]            | [-]    | [-]         | [-]               |
| 11.1         | 0                                | 0  | 0  | 0  | 15 | 0 | 0 | 0  | 0 | 1.00           | 1.00   | 1.00        |                   |
| 11.2         | 0                                | 0  | 0  | 0  | 4  | 0 | 0 | 0  | 0 | 1.00           | 1.00   | 1.00        |                   |
| 11.3         | 0                                | 0  | 0  | 0  | 3  | 0 | 0 | 0  | 0 | n/a            | n/a    | n/a         |                   |
| 12.1         | 0                                | 0  | 0  | 0  | 0  | 0 | 0 | 0  | 0 | n/a            | n/a    | n/a         |                   |
| 12.2         | 0                                | 0  | 0  | 0  | 1  | 0 | 0 | 0  | 0 | 1.00           | 1.00   | 1.00        |                   |
| 12.3         | 0                                | 0  | 0  | 0  | 2  | 0 | 0 | 0  | 0 | 1.00           | 1.00   | 1.00        |                   |
| 12.4         | 0                                | 0  | 0  | 0  | 1  | 0 | 0 | 0  | 0 | n/a            | n/a    | n/a         |                   |
| 12.5         | 0                                | 0  | 0  | 0  | 17 | 0 | 0 | 0  | 0 | 1.00           | 1.00   | 1.00        |                   |
| 12.6         | 0                                | 0  | 0  | 0  | 1  | 0 | 0 | 0  | 0 | n/a            | n/a    | n/a         |                   |
| 12.7         | 0                                | 0  | 0  | 0  | 5  | 0 | 0 | 0  | 0 | 1.00           | 1.00   | 1.00        |                   |
| 12.8         | 0                                | 0  | 0  | 0  | 7  | 0 | 0 | 0  | 0 | 1.00           | 1.00   | 1.00        |                   |
| 12.9         | 0                                | 0  | 0  | 0  | 2  | 0 | 0 | 0  | 0 | 1.00           | 1.00   | 1.00        |                   |
| 12.10        | 0                                | 0  | 0  | 0  | 3  | 0 | 0 | 0  | 0 | 1.00           | 1.00   | 1.00        |                   |
| 12.11        | 0                                | 0  | 0  | 0  | 4  | 0 | 0 | 0  | 0 | 1.00           | 1.00   | 1.00        |                   |
| 12.12        | 0                                | 0  | 0  | 0  | 1  | 0 | 0 | 0  | 0 | n/a            | n/a    | n/a         |                   |
| 12.13        | 0                                | 0  | 0  | 0  | 2  | 0 | 0 | 0  | 0 | 1.00           | 1.00   | 1.00        |                   |
| 12.14        | 0                                | 0  | 0  | 0  | 4  | 0 | 0 | 0  | 0 | n/a            | n/a    | n/a         |                   |
| 12.15        | 0                                | 0  | 0  | 0  | 2  | 0 | 0 | 0  | 0 | 1.00           | 1.00   | 1.00        |                   |
| 12.16        | 0                                | 0  | 0  | 0  | 14 | 0 | 0 | 0  | 0 | 1.00           | 1.00   | 1.00        |                   |
| 12.17        | 0                                | 0  | 0  | 0  | 0  | 0 | 0 | 0  | 0 | n/a            | n/a    | n/a         |                   |
| 12.18        | 0                                | 0  | 0  | 0  | 0  | 0 | 0 | 0  | 0 | n/a            | n/a    | n/a         |                   |
| 13.1         | 0                                | 0  | 0  | 0  | 0  | 0 | 0 | 0  | 0 | n/a            | n/a    | n/a         |                   |
| 13.2         | 0                                | 0  | 0  | 0  | 0  | 0 | 0 | 0  | 0 | n/a            | n/a    | n/a         |                   |
| 13.3         | 0                                | 0  | 0  | 0  | 14 | 0 | 0 | 0  | 0 | 1.00           | 1.00   | 1.00        |                   |
| 13.4         | 0                                | 0  | 0  | 0  | 8  | 0 | 0 | 0  | 0 | 1.00           | 1.00   | 1.00        |                   |
| 13.5         | 0                                | 0  | 0  | 0  | 0  | 0 | 0 | 0  | 0 | n/a            | n/a    | n/a         |                   |
| 13.6         | 0                                | 0  | 0  | 0  | 0  | 0 | 0 | 0  | 0 | n/a            | n/a    | n/a         |                   |

## Investor (developer) group

| Question no. | Frequency of the indicated value |      |      |      |   |   |   |   |   | Geometric mean | Median | Modal value    | Consistency index |
|--------------|----------------------------------|------|------|------|---|---|---|---|---|----------------|--------|----------------|-------------------|
| [-]          | -9                               | -7   | -5   | -3   | 1 | 3 | 5 | 7 | 9 | [-]            | [-]    | [-]            | [-]               |
| [-]          | 0.11                             | 0.14 | 0.20 | 0.33 | 1 | 3 | 5 | 7 | 9 | [-]            | [-]    | [-]            | [-]               |
| 1.1          | 0                                | 0    | 0    | 0    | 0 | 0 | 0 | 0 | 0 | n/a            | n/a    | n/a            |                   |
| 1.2          | 0                                | 0    | 0    | 0    | 0 | 1 | 0 | 0 | 0 | 1.00           | 1.00   | 1.00           |                   |
| 1.3          | 0                                | 0    | 0    | 0    | 0 | 1 | 0 | 0 | 0 | 1.00           | 1.00   | 1.00           |                   |
| 1.4          | 0                                | 0    | 0    | 0    | 0 | 1 | 0 | 0 | 0 | 1.00           | 1.00   | 1.00           |                   |
| 1.5          | 0                                | 0    | 0    | 0    | 0 | 0 | 0 | 0 | 0 | n/a            | n/a    | n/a            |                   |
| 1.6          | 0                                | 0    | 0    | 0    | 0 | 0 | 0 | 0 | 0 | n/a            | n/a    | n/a            |                   |
| 1.7          | 0                                | 0    | 0    | 0    | 0 | 9 | 0 | 0 | 0 | 1.00           | 1.00   | 1.00           |                   |
| 1.8          | 0                                | 0    | 0    | 0    | 0 | 3 | 0 | 0 | 0 | 1.00           | 1.00   | 1.00           |                   |
| 1.9          | 0                                | 0    | 0    | 0    | 0 | 1 | 0 | 0 | 0 | 1.00           | 1.00   | 1.00           |                   |
| Question no. | Frequency of the indicated value |      |      |      |   |   |   |   |   | Geometric mean | Median | Modal value    | Consistency index |
| [-]          | -9                               | -7   | -5   | -3   | 1 | 2 | 3 | 4 | 5 | [-]            | [-]    | [-]            | [-]               |
| 2.1          | 0                                | 0    | 0    | 0    | 0 | 0 | 0 | 1 | 3 | 4.39           | 5.00   | 5.00           |                   |
| 2.2          | 0                                | 0    | 0    | 0    | 0 | 0 | 1 | 1 | 3 | 3.53           | 4.00   | 4.00           |                   |
| 2.3          | 0                                | 0    | 0    | 0    | 0 | 1 | 1 | 0 | 1 | 2.00           | 2.00   | 1.00/2.00/4.00 |                   |
| 2.4          | 0                                | 0    | 0    | 0    | 0 | 0 | 2 | 0 | 0 | 2.00           | 2.00   | 2.00           |                   |
| 2.5          | 0                                | 0    | 0    | 0    | 0 | 1 | 0 | 1 | 0 | 1.73           | 2.00   | 1.00/3.00      |                   |
| Question no. | Frequency of the indicated value |      |      |      |   |   |   |   |   | Geometric mean | Median | Modal value    | Consistency index |
| [-]          | -9                               | -7   | -5   | -3   | 1 | 3 | 5 | 7 | 9 | [-]            | [-]    | [-]            | [-]               |
| [-]          | 0.11                             | 0.14 | 0.20 | 0.33 | 1 | 3 | 5 | 7 | 9 | [-]            | [-]    | [-]            | [-]               |
| 3.1          | 0                                | 1    | 1    | 2    | 0 | 4 | 1 | 0 | 0 | 1.03           | 3.00   | 3.00           | 0.11              |
| 3.2          | 0                                | 0    | 1    | 2    | 1 | 3 | 1 | 1 | 0 | 1.40           | 3.00   | 3.00           |                   |
| 3.3          | 0                                | 0    | 0    | 0    | 1 | 4 | 2 | 1 | 1 | 3.69           | 3.00   | 3.00           |                   |
| 3.4          | 0                                | 0    | 0    | 0    | 2 | 4 | 1 | 2 | 0 | 3.00           | 3.00   | 3.00           |                   |
| 3.5          | 0                                | 0    | 1    | 1    | 2 | 5 | 0 | 0 | 0 | 1.36           | 3.00   | 3.00           |                   |
| 3.6          | 0                                | 0    | 1    | 2    | 1 | 3 | 0 | 1 | 1 | 1.50           | 3.00   | 3.00           |                   |
| 3.7          | 0                                | 0    | 0    | 3    | 1 | 3 | 0 | 1 | 1 | 1.58           | 3.00   | 0.33/3.00      |                   |
| 3.8          | 0                                | 0    | 0    | 4    | 0 | 2 | 1 | 1 | 1 | 1.48           | 3.00   | 0.33           |                   |
| 3.9          | 0                                | 0    | 0    | 4    | 1 | 1 | 1 | 1 | 1 | 1.31           | 1.00   | 0.33           |                   |
| 3.10         | 0                                | 0    | 0    | 4    | 4 | 1 | 0 | 0 | 0 | 0.69           | 1.00   | 0.33/1.00      |                   |
| 4.1          | 0                                | 0    | 0    | 1    | 1 | 6 | 1 | 0 | 0 | 2.20           | 3.00   | 3.00           | 0.09              |
| 4.2          | 0                                | 0    | 0    | 4    | 1 | 3 | 1 | 0 | 0 | 1.06           | 1.00   | 0.33           |                   |
| 4.3          | 0                                | 0    | 0    | 2    | 1 | 4 | 2 | 0 | 0 | 1.83           | 3.00   | 3.00           |                   |
| 4.4          | 0                                | 0    | 1    | 1    | 1 | 6 | 0 | 0 | 0 | 1.54           | 3.00   | 3.00           |                   |
| 4.5          | 0                                | 0    | 3    | 3    | 2 | 1 | 0 | 0 | 0 | 0.46           | 0.33   | 0.20/0.33      |                   |
| 4.6          | 0                                | 0    | 2    | 1    | 4 | 1 | 1 | 0 | 0 | 0.84           | 1.00   | 1.00           |                   |
| 4.7          | 0                                | 0    | 2    | 2    | 3 | 1 | 0 | 1 | 0 | 0.77           | 1.00   | 1.00           |                   |
| 4.8          | 0                                | 0    | 0    | 1    | 1 | 6 | 0 | 1 | 0 | 2.29           | 3.00   | 3.00           |                   |
| 4.9          | 0                                | 0    | 0    | 0    | 2 | 6 | 1 | 0 | 0 | 2.49           | 3.00   | 3.00           |                   |
| 4.10         | 0                                | 0    | 1    | 0    | 7 | 1 | 0 | 0 | 0 | 0.94           | 1.00   | 1.00           |                   |
| 5.1          | 0                                | 0    | 2    | 2    | 1 | 4 | 0 | 0 | 0 | 0.89           | 1.00   | 3.00           | 0.14              |



|      |   |   |   |   |   |   |   |   |   |             |      |           |      |
|------|---|---|---|---|---|---|---|---|---|-------------|------|-----------|------|
| 5.2  | 0 | 0 | 2 | 5 | 1 | 1 | 0 | 0 | 0 | <b>0.43</b> | 0.33 | 0.33      |      |
| 5.3  | 0 | 0 | 1 | 4 | 1 | 3 | 0 | 0 | 0 | <b>0.74</b> | 0.33 | 0.33      |      |
| 5.4  | 0 | 0 | 0 | 2 | 2 | 4 | 1 | 0 | 0 | <b>1.53</b> | 3.00 | 3.00      |      |
| 5.5  | 0 | 0 | 0 | 4 | 4 | 0 | 1 | 0 | 0 | <b>0.73</b> | 1.00 | 0.33/1.00 |      |
| 5.6  | 0 | 0 | 0 | 1 | 4 | 4 | 0 | 0 | 0 | <b>1.44</b> | 1.00 | 1.00/3.00 |      |
| 5.7  | 0 | 0 | 0 | 0 | 2 | 4 | 2 | 1 | 0 | <b>2.89</b> | 3.00 | 3.00      |      |
| 5.8  | 0 | 0 | 0 | 0 | 1 | 6 | 2 | 0 | 0 | <b>2.97</b> | 3.00 | 3.00      |      |
| 5.9  | 0 | 0 | 0 | 0 | 1 | 6 | 2 | 0 | 0 | <b>2.97</b> | 3.00 | 3.00      |      |
| 5.10 | 0 | 0 | 0 | 0 | 5 | 3 | 1 | 0 | 0 | <b>1.72</b> | 1.00 | 1.00      |      |
| 6.1  | 0 | 1 | 1 | 1 | 1 | 5 | 0 | 0 | 0 | <b>1.10</b> | 3.00 | 3.00      | 0.16 |
| 6.2  | 0 | 0 | 0 | 2 | 3 | 4 | 0 | 0 | 0 | <b>1.28</b> | 1.00 | 3.00      |      |
| 6.3  | 0 | 0 | 0 | 1 | 1 | 4 | 2 | 1 | 0 | <b>2.56</b> | 3.00 | 3.00      |      |
| 6.4  | 0 | 1 | 0 | 6 | 2 | 0 | 0 | 0 | 0 | <b>0.39</b> | 0.33 | 0.33      |      |
| 6.5  | 0 | 1 | 0 | 0 | 2 | 6 | 0 | 0 | 0 | <b>1.68</b> | 3.00 | 3.00      |      |
| 6.6  | 0 | 0 | 0 | 0 | 1 | 5 | 3 | 0 | 0 | <b>3.15</b> | 3.00 | 3.00      |      |
| 6.7  | 0 | 0 | 1 | 5 | 2 | 1 | 0 | 0 | 0 | <b>0.51</b> | 0.33 | 0.33      |      |
| 6.8  | 0 | 0 | 0 | 1 | 2 | 4 | 2 | 0 | 0 | <b>2.06</b> | 3.00 | 3.00      |      |
| 6.9  | 0 | 0 | 0 | 7 | 2 | 0 | 0 | 0 | 0 | <b>0.43</b> | 0.33 | 0.33      |      |
| 6.10 | 0 | 1 | 3 | 2 | 2 | 1 | 0 | 0 | 0 | <b>0.42</b> | 0.33 | 0.20      |      |
| 7.1  | 0 | 0 | 0 | 0 | 7 | 2 | 0 | 0 | 0 | <b>1.28</b> | 1.00 | 1.00      | 0.06 |
| 7.2  | 0 | 0 | 0 | 3 | 5 | 1 | 0 | 0 | 0 | <b>0.78</b> | 1.00 | 1.00      |      |
| 7.3  | 0 | 0 | 0 | 5 | 4 | 0 | 0 | 0 | 0 | <b>0.54</b> | 0.33 | 0.33      |      |
| 7.4  | 0 | 0 | 0 | 4 | 4 | 1 | 0 | 0 | 0 | <b>0.69</b> | 1.00 | 0.33/1.00 |      |
| 7.5  | 0 | 0 | 2 | 3 | 4 | 0 | 0 | 0 | 0 | <b>0.48</b> | 0.33 | 1.00      |      |
| 7.6  | 0 | 0 | 2 | 4 | 3 | 0 | 0 | 0 | 0 | <b>0.43</b> | 0.33 | 0.33      |      |
| 7.7  | 0 | 0 | 1 | 4 | 3 | 1 | 0 | 0 | 0 | <b>0.58</b> | 0.33 | 0.33      |      |
| 7.8  | 0 | 0 | 0 | 2 | 5 | 1 | 1 | 0 | 0 | <b>1.06</b> | 1.00 | 1.00      |      |
| 7.9  | 0 | 0 | 0 | 1 | 7 | 1 | 0 | 0 | 0 | <b>1.00</b> | 1.00 | 1.00      |      |
| 7.10 | 0 | 0 | 0 | 2 | 5 | 0 | 2 | 0 | 0 | <b>1.12</b> | 1.00 | 1.00      |      |
| 8.1  | 0 | 0 | 0 | 1 | 3 | 4 | 1 | 0 | 0 | <b>1.72</b> | 3.00 | 3.00      | 0.04 |
| 8.2  | 0 | 0 | 0 | 4 | 2 | 3 | 0 | 0 | 0 | <b>0.89</b> | 1.00 | 0.33      |      |
| 8.3  | 0 | 0 | 0 | 4 | 2 | 2 | 1 | 0 | 0 | <b>0.94</b> | 1.00 | 0.33      |      |
| 8.4  | 0 | 0 | 0 | 5 | 3 | 1 | 0 | 0 | 0 | <b>0.61</b> | 0.33 | 0.33      |      |
| 8.5  | 0 | 0 | 0 | 6 | 2 | 0 | 1 | 0 | 0 | <b>0.57</b> | 0.33 | 0.33      |      |
| 8.6  | 0 | 0 | 0 | 5 | 2 | 1 | 1 | 0 | 0 | <b>0.73</b> | 0.33 | 0.33      |      |
| 8.7  | 0 | 0 | 0 | 6 | 3 | 0 | 0 | 0 | 0 | <b>0.48</b> | 0.33 | 0.33      |      |
| 8.8  | 0 | 0 | 0 | 2 | 6 | 1 | 0 | 0 | 0 | <b>0.89</b> | 1.00 | 1.00      |      |
| 8.9  | 0 | 0 | 0 | 1 | 5 | 3 | 0 | 0 | 0 | <b>1.28</b> | 1.00 | 1.00      |      |
| 8.10 | 0 | 0 | 0 | 3 | 4 | 2 | 0 | 0 | 0 | <b>0.89</b> | 1.00 | 1.00      |      |
| 9.1  | 0 | 0 | 0 | 2 | 2 | 3 | 2 | 0 | 0 | <b>1.62</b> | 3.00 | 3.00      | 0.05 |
| 9.2  | 0 | 0 | 0 | 3 | 1 | 4 | 1 | 0 | 0 | <b>1.35</b> | 3.00 | 3.00      |      |
| 9.3  | 0 | 0 | 1 | 1 | 1 | 3 | 3 | 0 | 0 | <b>1.83</b> | 3.00 | 3.00/5.00 |      |
| 9.4  | 0 | 0 | 1 | 5 | 1 | 1 | 0 | 1 | 0 | <b>0.64</b> | 0.33 | 0.33      |      |
| 9.5  | 0 | 0 | 0 | 5 | 3 | 0 | 1 | 0 | 0 | <b>0.65</b> | 0.33 | 0.33      |      |
| 9.6  | 0 | 0 | 0 | 2 | 5 | 2 | 0 | 0 | 0 | <b>1.00</b> | 1.00 | 1.00      |      |
| 9.7  | 0 | 0 | 0 | 3 | 0 | 6 | 0 | 0 | 0 | <b>1.44</b> | 3.00 | 3.00      |      |
| 9.8  | 0 | 0 | 1 | 6 | 0 | 1 | 0 | 1 | 0 | <b>0.56</b> | 0.33 | 0.33      |      |
| 9.9  | 0 | 0 | 0 | 7 | 0 | 0 | 1 | 1 | 0 | <b>0.63</b> | 0.33 | 0.33      |      |
| 9.10 | 0 | 0 | 0 | 1 | 2 | 5 | 1 | 0 | 0 | <b>1.95</b> | 3.00 | 3.00      |      |
| 9.11 | 0 | 0 | 1 | 6 | 1 | 0 | 0 | 1 | 0 | <b>0.50</b> | 0.33 | 0.33      |      |
| 9.12 | 0 | 0 | 0 | 6 | 2 | 0 | 1 | 0 | 0 | <b>0.57</b> | 0.33 | 0.33      |      |
| 9.13 | 0 | 0 | 6 | 1 | 0 | 0 | 2 | 0 | 0 | <b>0.43</b> | 0.20 | 0.20      |      |

| 9.14         | 0                                | 0  | 5  | 1  | 1 | 2 | 0 | 0 | 0 | <b>0.46</b>    | 0.20   | 0.20        |                   |
|--------------|----------------------------------|----|----|----|---|---|---|---|---|----------------|--------|-------------|-------------------|
| 9.15         | 0                                | 0  | 1  | 2  | 4 | 2 | 0 | 0 | 0 | <b>0.84</b>    | 1.00   | 1.00        |                   |
| Question no. | Frequency of the indicated value |    |    |    |   |   |   |   |   | Geometric mean | Median | Modal value | Consistency index |
| [-]          | -9                               | -7 | -5 | -3 | 1 | 2 | 3 | 4 | 5 | [-]            | [-]    | [-]         | [-]               |
| 10.1         | 0                                | 0  | 0  | 0  | 0 | 1 | 1 | 4 | 3 | <b>3.86</b>    | 4.00   | 4.00        |                   |
| 10.2         | 0                                | 0  | 0  | 0  | 0 | 0 | 3 | 5 | 1 | <b>3.73</b>    | 4.00   | 4.00        |                   |
| Question no. | Frequency of the indicated value |    |    |    |   |   |   |   |   | Geometric mean | Median | Modal value | Consistency index |
| [-]          | -9                               | -7 | -5 | -3 | 1 | 2 | 3 | 4 | 5 | [-]            | [-]    | [-]         | [-]               |
| 11.1         | 0                                | 0  | 0  | 0  | 0 | 8 | 0 | 0 | 0 | <b>1.00</b>    | 1.00   | 1.00        |                   |
| 11.2         | 0                                | 0  | 0  | 0  | 0 | 1 | 0 | 0 | 0 | <b>1.00</b>    | 1.00   | 1.00        |                   |
| 11.3         | 0                                | 0  | 0  | 0  | 0 | 0 | 0 | 0 | 0 | <b>1.00</b>    | n/a    | n/a         |                   |
| 12.1         | 0                                | 0  | 0  | 0  | 0 | 0 | 0 | 0 | 0 | <b>n/a</b>     | n/a    | n/a         |                   |
| 12.2         | 0                                | 0  | 0  | 0  | 0 | 1 | 0 | 0 | 0 | <b>1.00</b>    | 1.00   | 1.00        |                   |
| 12.3         | 0                                | 0  | 0  | 0  | 0 | 0 | 0 | 0 | 0 | <b>n/a</b>     | n/a    | n/a         |                   |
| 12.4         | 0                                | 0  | 0  | 0  | 0 | 2 | 0 | 0 | 0 | <b>1.00</b>    | 1.00   | 1.00        |                   |
| 12.5         | 0                                | 0  | 0  | 0  | 0 | 6 | 0 | 0 | 0 | <b>1.00</b>    | 1.00   | 1.00        |                   |
| 12.6         | 0                                | 0  | 0  | 0  | 0 | 0 | 0 | 0 | 0 | <b>n/a</b>     | n/a    | n/a         |                   |
| 12.7         | 0                                | 0  | 0  | 0  | 0 | 0 | 0 | 0 | 0 | <b>n/a</b>     | n/a    | n/a         |                   |
| 12.8         | 0                                | 0  | 0  | 0  | 0 | 3 | 0 | 0 | 0 | <b>1.00</b>    | 1.00   | 1.00        |                   |
| 12.9         | 0                                | 0  | 0  | 0  | 0 | 4 | 0 | 0 | 0 | <b>1.00</b>    | 1.00   | 1.00        |                   |
| 12.10        | 0                                | 0  | 0  | 0  | 0 | 1 | 0 | 0 | 0 | <b>1.00</b>    | 1.00   | 1.00        |                   |
| 12.11        | 0                                | 0  | 0  | 0  | 0 | 1 | 0 | 0 | 0 | <b>1.00</b>    | 1.00   | 1.00        |                   |
| 12.12        | 0                                | 0  | 0  | 0  | 0 | 0 | 0 | 0 | 0 | <b>n/a</b>     | n/a    | n/a         |                   |
| 12.13        | 0                                | 0  | 0  | 0  | 0 | 1 | 0 | 0 | 0 | <b>1.00</b>    | 1.00   | 1.00        |                   |
| 12.14        | 0                                | 0  | 0  | 0  | 0 | 0 | 0 | 0 | 0 | <b>n/a</b>     | n/a    | n/a         |                   |
| 12.15        | 0                                | 0  | 0  | 0  | 0 | 3 | 0 | 0 | 0 | <b>1.00</b>    | 1.00   | 1.00        |                   |
| 12.16        | 0                                | 0  | 0  | 0  | 0 | 5 | 0 | 0 | 0 | <b>1.00</b>    | 1.00   | 1.00        |                   |
| 12.17        | 0                                | 0  | 0  | 0  | 0 | 0 | 0 | 0 | 0 | <b>n/a</b>     | n/a    | n/a         |                   |
| 12.18        | 0                                | 0  | 0  | 0  | 0 | 0 | 0 | 0 | 0 | <b>n/a</b>     | n/a    | n/a         |                   |
| 13.1         | 0                                | 0  | 0  | 0  | 0 | 0 | 0 | 0 | 0 | <b>n/a</b>     | n/a    | n/a         |                   |
| 13.2         | 0                                | 0  | 0  | 0  | 0 | 0 | 0 | 0 | 0 | <b>1.00</b>    | 1.00   | 1.00        |                   |
| 13.3         | 0                                | 0  | 0  | 0  | 0 | 4 | 0 | 0 | 0 | <b>1.00</b>    | 1.00   | 1.00        |                   |
| 13.4         | 0                                | 0  | 0  | 0  | 0 | 5 | 0 | 0 | 0 | <b>1.00</b>    | 1.00   | 1.00        |                   |
| 13.5         | 0                                | 0  | 0  | 0  | 0 | 0 | 0 | 0 | 0 | <b>n/a</b>     | n/a    | n/a         |                   |
| 13.6         | 0                                | 0  | 0  | 0  | 0 | 0 | 0 | 0 | 0 | <b>n/a</b>     | n/a    | n/a         |                   |
