# Supplementary material for: The Methodology for Designing Residential Buildings with a Positive Energy Balance—General Approach
Source: MDPI journal article supplement (doi:10.3390/en14154715), 2021-08-03
Supplement: s1 [file s1]

**Table S2** – Distribution of the frequency of evaluation marks for the intensity of impact given by experts, the geometric mean, the median, the modal value, and the column presenting the lack of impact.

| Question no. | Frequency of the indicated value |      |      |      |    |    |    |    |   |  | Geometric mean | Median | Modal value | No impact | Consistency Index |
|--------------|----------------------------------|------|------|------|----|----|----|----|---|--|----------------|--------|-------------|-----------|-------------------|
| [-]          | -9                               | -7   | -5   | -3   | 1  | 3  | 5  | 7  | 9 |  | [-]            | [-]    | [-]         | [-]       | [-]               |
| [-]          | 0.11                             | 0.14 | 0.20 | 0.33 | 1  | 3  | 5  | 7  | 9 |  | [-]            | [-]    | [-]         |           |                   |
| 1.1          | 0                                | 0    | 0    | 0    | 9  | 0  | 0  | 0  | 0 |  | 1.00           | 1.00   | 1.00        |           |                   |
| 1.2          | 0                                | 0    | 0    | 0    | 0  | 0  | 0  | 0  | 0 |  | n/a            | n/a    | n/a         |           |                   |
| 1.3          | 0                                | 0    | 0    | 0    | 15 | 0  | 0  | 0  | 0 |  | 1.00           | 1.00   | 1.00        |           |                   |
| 1.4          | 0                                | 0    | 0    | 0    | 2  | 0  | 0  | 0  | 0 |  | 1.00           | 1.00   | 1.00        |           |                   |
| 1.5          | 0                                | 0    | 0    | 0    | 6  | 0  | 0  | 0  | 0 |  | 1.00           | 1.00   | 1.00        |           |                   |
| 1.6          | 0                                | 0    | 0    | 0    | 9  | 0  | 0  | 0  | 0 |  | 1.00           | 1.00   | 1.00        |           |                   |
| 1.7          | 0                                | 0    | 0    | 0    | 2  | 0  | 0  | 0  | 0 |  | 1.00           | 1.00   | 1.00        |           |                   |
| 1.8          | 0                                | 0    | 0    | 0    | 2  | 0  | 0  | 0  | 0 |  | 1.00           | 1.00   | 1.00        |           |                   |
| 1.9          | 0                                | 0    | 0    | 0    | 0  | 0  | 0  | 0  | 0 |  | n/a            | n/a    | n/a         |           |                   |
| Question no. | Frequency of the indicated value |      |      |      |    |    |    |    |   |  | Geometric mean | Median | Modal value |           |                   |
| [-]          | -9                               | -7   | -5   | -3   | 1  | 2  | 3  | 4  | 5 |  | [-]            | [-]    | [-]         |           |                   |
| 2.1          | 0                                | 0    | 0    | 0    | 0  | 0  | 7  | 14 | 8 |  | 3.97           | 4.00   | 4.00        |           |                   |
| 2.2          | 0                                | 0    | 0    | 0    | 2  | 1  | 9  | 12 | 1 |  | 3.17           | 4.00   | 4.00        |           |                   |
| 2.3          | 0                                | 0    | 0    | 0    | 2  | 8  | 8  | 7  | 2 |  | 2.74           | 3.00   | 2.00/3.00   |           |                   |
| 2.4          | 0                                | 0    | 0    | 0    | 2  | 6  | 10 | 7  | 2 |  | 2.83           | 3.00   | 3.00        |           |                   |
| 2.5          | 0                                | 0    | 0    | 0    | 5  | 8  | 9  | 3  | 0 |  | 2.19           | 2.00   | 3.00        |           |                   |
| Question no. | Frequency of the indicated value |      |      |      |    |    |    |    |   |  | Geometric mean | Median | Modal value |           |                   |
| [-]          | -9                               | -7   | -5   | -3   | 0  | 3  | 5  | 7  | 9 |  | [-]            | [-]    | [-]         |           |                   |
| [-]          | 0.11                             | 0.14 | 0.20 | 0.33 | 1  | 3  | 5  | 7  | 9 |  | [-]            | [-]    | [-]         |           |                   |
| 3.1          | 1                                | 7    | 8    | 10   | 1  | 3  | 1  | 0  | 0 |  | 0.33           | 0.20   | 0.33        |           |                   |
| 3.2          | 1                                | 4    | 10   | 11   | 1  | 4  | 0  | 0  | 0 |  | 0.34           | 0.33   | 0.33        |           |                   |
| 3.3          | 0                                | 0    | 3    | 10   | 17 | 1  | 0  | 0  | 0 |  | 0.62           | 1.00   | 1.00        | n/a       |                   |
| 3.4          | 1                                | 0    | 1    | 3    | 25 | 1  | 0  | 0  | 0 |  | 0.82           | 1.00   | 1.00        | n/a       |                   |
| 3.5          | 0                                | 0    | 1    | 0    | 3  | 5  | 7  | 10 | 5 |  | 4.35           | 5.00   | 7.00        |           |                   |
| 3.6          | 0                                | 1    | 0    | 10   | 11 | 4  | 3  | 1  | 1 |  | 1.01           | 1.00   | 1.00        |           |                   |
| 3.7          | 0                                | 0    | 0    | 11   | 16 | 1  | 2  | 1  | 0 |  | 0.83           | 1.00   | 1.00        | n/a       |                   |
| 3.8          | 0                                | 2    | 2    | 5    | 16 | 4  | 1  | 0  | 1 |  | 0.87           | 1.00   | 1.00        | n/a       |                   |
| 3.9          | 0                                | 1    | 4    | 5    | 17 | 3  | 1  | 0  | 0 |  | 0.75           | 1.00   | 1.00        | n/a       |                   |
| 3.10         | 1                                | 0    | 1    | 0    | 16 | 8  | 5  | 0  | 0 |  | 1.52           | 1.00   | 1.00        | n/a       |                   |
| 4.1          | 0                                | 0    | 1    | 0    | 2  | 2  | 9  | 11 | 6 |  | 4.96           | 7.00   | 7.00        |           |                   |
| 4.2          | 0                                | 0    | 0    | 1    | 2  | 2  | 11 | 8  | 7 |  | 4.98           | 5.00   | 5.00        |           |                   |
| 4.3          | 0                                | 0    | 0    | 0    | 1  | 5  | 4  | 12 | 9 |  | 5.91           | 7.00   | 7.00        |           |                   |
| 4.4          | 0                                | 0    | 1    | 0    | 3  | 3  | 7  | 8  | 9 |  | 4.75           | 7.00   | 9.00        |           |                   |
| 4.5          | 8                                | 13   | 1    | 2    | 1  | 3  | 2  | 0  | 1 |  | 0.29           | 0.14   | 0.14        |           |                   |
| 4.6          | 0                                | 0    | 0    | 0    | 20 | 4  | 4  | 2  | 1 |  | 1.73           | 1.00   | 1.00        | n/a       |                   |
| 4.7          | 0                                | 1    | 9    | 5    | 8  | 4  | 2  | 2  | 0 |  | 0.71           | 1.00   | 0.20        |           |                   |
| 4.8          | 0                                | 3    | 3    | 3    | 12 | 2  | 4  | 3  | 1 |  | 1.09           | 1.00   | 1.00        |           |                   |
| 4.9          | 2                                | 2    | 10   | 5    | 3  | 6  | 0  | 3  | 0 |  | 0.57           | 0.33   | 0.20        |           |                   |
| 4.10         | 0                                | 6    | 4    | 10   | 6  | 4  | 0  | 1  | 0 |  | 0.48           | 0.33   | 0.33        |           |                   |
| 5.1          | 1                                | 1    | 1    | 4    | 6  | 10 | 7  | 1  | 0 |  | 1.57           | 3.00   | 3.00        |           |                   |
| 5.2          | 1                                | 4    | 12   | 5    | 2  | 3  | 3  | 1  | 0 |  | 0.45           | 0.20   | 0.20        |           |                   |
| 5.3          | 0                                | 2    | 3    | 6    | 10 | 7  | 2  | 1  | 0 |  | 0.92           | 1.00   | 1.00        |           |                   |
| 5.4          | 0                                | 2    | 4    | 2    | 2  | 14 | 4  | 2  | 1 |  | 1.64           | 3.00   | 3.00        |           |                   |
| 5.5          | 3                                | 8    | 8    | 7    | 3  | 1  | 1  | 0  | 0 |  | 0.28           | 0.20   | 0.14/0.20   |           |                   |
| 5.6          | 0                                | 1    | 3    | 6    | 3  | 4  | 10 | 3  | 1 |  | 1.63           | 3.00   | 5.00        |           |                   |
| 5.7          | 0                                | 0    | 4    | 1    | 6  | 9  | 6  | 4  | 1 |  | 2.03           | 3.00   | 3.00        |           |                   |
| 5.8          | 0                                | 0    | 5    | 1    | 2  | 5  | 10 | 7  | 1 |  | 2.49           | 5.00   | 5.00        |           |                   |

|       |   |   |    |    |    |    |    |    |   |             |      |           |     |        |
|-------|---|---|----|----|----|----|----|----|---|-------------|------|-----------|-----|--------|
| 5.9   | 0 | 0 | 1  | 1  | 2  | 7  | 14 | 6  | 0 | <b>3.54</b> | 5.00 | 5.00      |     |        |
| 5.10  | 0 | 0 | 0  | 1  | 2  | 11 | 11 | 6  | 0 | <b>3.68</b> | 5.00 | 3.00/5.00 |     |        |
| 6.1   | 0 | 4 | 10 | 8  | 2  | 2  | 3  | 1  | 1 | <b>0.50</b> | 0.33 | 0.20      |     |        |
| 6.2   | 1 | 6 | 8  | 5  | 2  | 2  | 6  | 0  | 1 | <b>0.56</b> | 0.33 | 0.20      |     |        |
| 6.3   | 2 | 3 | 6  | 9  | 2  | 3  | 1  | 4  | 1 | <b>0.62</b> | 0.33 | 0.33      |     |        |
| 6.4   | 0 | 9 | 6  | 8  | 0  | 0  | 6  | 1  | 1 | <b>0.49</b> | 0.33 | 0.14      |     |        |
| 6.5   | 3 | 5 | 11 | 7  | 0  | 1  | 2  | 2  | 0 | <b>0.34</b> | 0.20 | 0.20      |     | 0.1999 |
| 6.6   | 0 | 2 | 2  | 1  | 4  | 8  | 5  | 7  | 2 | <b>2.36</b> | 3.00 | 3.00      |     |        |
| 6.7   | 0 | 3 | 2  | 2  | 1  | 10 | 6  | 6  | 1 | <b>2.12</b> | 3.00 | 3.00      |     |        |
| 6.8   | 0 | 2 | 0  | 0  | 3  | 2  | 12 | 11 | 1 | <b>3.78</b> | 5.00 | 5.00      |     |        |
| 6.9   | 0 | 0 | 3  | 1  | 3  | 10 | 6  | 8  | 0 | <b>2.66</b> | 3.00 | 3.00      |     |        |
| 6.10  | 0 | 1 | 0  | 5  | 6  | 7  | 10 | 1  | 1 | <b>1.94</b> | 3.00 | 5.00      |     |        |
| 7.1   | 1 | 2 | 0  | 2  | 15 | 4  | 2  | 2  | 3 | <b>1.37</b> | 1.00 | 1.00      |     |        |
| 7.2   | 1 | 3 | 0  | 1  | 23 | 2  | 0  | 1  | 0 | <b>0.85</b> | 1.00 | 1.00      | n/a |        |
| 7.3   | 1 | 0 | 0  | 3  | 23 | 3  | 0  | 1  | 0 | <b>0.99</b> | 1.00 | 1.00      | n/a |        |
| 7.4   | 2 | 1 | 0  | 4  | 5  | 9  | 6  | 2  | 2 | <b>1.74</b> | 3.00 | 3.00      |     |        |
| 7.5   | 3 | 1 | 0  | 3  | 23 | 0  | 1  | 0  | 0 | <b>0.72</b> | 1.00 | 1.00      | n/a | 0.0237 |
| 7.6   | 3 | 0 | 0  | 2  | 26 | 0  | 0  | 0  | 0 | <b>0.75</b> | 1.00 | 1.00      | n/a |        |
| 7.7   | 2 | 1 | 3  | 5  | 8  | 9  | 2  | 1  | 0 | <b>0.95</b> | 1.00 | 3.00      |     |        |
| 7.8   | 2 | 0 | 0  | 2  | 26 | 1  | 0  | 0  | 0 | <b>0.84</b> | 1.00 | 1.00      | n/a |        |
| 7.9   | 0 | 1 | 1  | 6  | 9  | 10 | 2  | 2  | 0 | <b>1.29</b> | 1.00 | 3.00      |     |        |
| 7.10  | 0 | 1 | 0  | 3  | 15 | 7  | 3  | 1  | 1 | <b>1.45</b> | 1.00 | 1.00      |     |        |
| 8.1   | 1 | 1 | 0  | 4  | 4  | 8  | 9  | 4  | 0 | <b>2.07</b> | 3.00 | 5.00      |     |        |
| 8.2   | 0 | 0 | 1  | 3  | 3  | 16 | 7  | 1  | 0 | <b>2.30</b> | 3.00 | 3.00      |     |        |
| 8.3   | 0 | 1 | 1  | 1  | 14 | 3  | 7  | 3  | 1 | <b>1.78</b> | 1.00 | 1.00      |     |        |
| 8.4   | 0 | 1 | 3  | 1  | 15 | 2  | 5  | 3  | 1 | <b>1.40</b> | 1.00 | 1.00      |     |        |
| 8.5   | 0 | 1 | 1  | 1  | 0  | 10 | 13 | 4  | 1 | <b>3.32</b> | 5.00 | 5.00      |     | 0.1164 |
| 8.6   | 0 | 1 | 2  | 4  | 15 | 3  | 4  | 2  | 0 | <b>1.14</b> | 1.00 | 1.00      |     |        |
| 8.7   | 0 | 2 | 2  | 3  | 12 | 4  | 7  | 1  | 0 | <b>1.26</b> | 1.00 | 1.00      |     |        |
| 8.8   | 0 | 4 | 9  | 9  | 1  | 3  | 5  | 0  | 0 | <b>0.51</b> | 0.33 | 0.20/0.33 |     |        |
| 8.9   | 0 | 2 | 10 | 9  | 4  | 5  | 1  | 0  | 0 | <b>0.48</b> | 0.33 | 0.20      |     |        |
| 8.10  | 1 | 0 | 4  | 1  | 15 | 5  | 5  | 0  | 0 | <b>1.13</b> | 1.00 | 1.00      |     |        |
| 9.1   | 2 | 4 | 4  | 3  | 4  | 4  | 7  | 3  | 0 | <b>0.99</b> | 1.00 | 5.00      |     |        |
| 9.2   | 2 | 2 | 7  | 2  | 5  | 6  | 7  | 0  | 0 | <b>0.88</b> | 1.00 | 0.20/5.00 |     |        |
| 9.3   | 2 | 5 | 2  | 1  | 1  | 5  | 11 | 4  | 0 | <b>1.50</b> | 3.00 | 5.00      |     |        |
| 9.4   | 1 | 2 | 3  | 4  | 1  | 13 | 7  | 0  | 0 | <b>1.39</b> | 3.00 | 3.00      |     |        |
| 9.5   | 2 | 3 | 3  | 1  | 0  | 11 | 11 | 0  | 0 | <b>1.55</b> | 3.00 | 3.00/5.00 |     |        |
| 9.6   | 1 | 2 | 5  | 6  | 1  | 11 | 4  | 0  | 1 | <b>1.00</b> | 3.00 | 3.00      |     |        |
| 9.7   | 3 | 7 | 7  | 6  | 0  | 1  | 5  | 2  | 0 | <b>0.45</b> | 0.20 | 0.14/0.20 |     |        |
| 9.8   | 1 | 1 | 4  | 2  | 9  | 6  | 7  | 0  | 1 | <b>1.26</b> | 1.00 | 1.00      |     | 0.0333 |
| 9.9   | 2 | 2 | 13 | 7  | 0  | 2  | 1  | 1  | 3 | <b>0.45</b> | 0.20 | 0.20      |     |        |
| 9.10  | 0 | 5 | 6  | 7  | 5  | 2  | 5  | 1  | 0 | <b>0.62</b> | 0.33 | 0.33      |     |        |
| 9.11  | 0 | 2 | 4  | 9  | 9  | 3  | 4  | 0  | 0 | <b>0.71</b> | 1.00 | 0.33/1.00 |     |        |
| 9.12  | 0 | 3 | 9  | 10 | 2  | 2  | 4  | 0  | 1 | <b>0.52</b> | 0.33 | 0.33      |     |        |
| 9.13  | 1 | 2 | 9  | 8  | 0  | 6  | 5  | 0  | 0 | <b>0.62</b> | 0.33 | 0.20      |     |        |
| 9.14  | 1 | 0 | 5  | 13 | 2  | 7  | 3  | 0  | 0 | <b>0.68</b> | 0.33 | 0.33      |     |        |
| 9.15  | 0 | 0 | 5  | 4  | 7  | 8  | 7  | 0  | 0 | <b>1.28</b> | 1.00 | 3.00      |     |        |
| 10.1  | 1 | 5 | 12 | 7  | 1  | 2  | 1  | 2  | 0 | <b>0.37</b> | 0.20 | 0.20      |     |        |
| 10.2  | 3 | 6 | 12 | 4  | 0  | 3  | 1  | 2  | 0 | <b>0.34</b> | 0.20 | 0.20      |     |        |
| 10.3  | 1 | 8 | 11 | 5  | 0  | 2  | 1  | 2  | 1 | <b>0.37</b> | 0.20 | 0.20      |     |        |
| 10.4  | 1 | 0 | 4  | 8  | 16 | 2  | 0  | 0  | 0 | <b>0.61</b> | 1.00 | 1.00      | n/a |        |
| 10.5  | 0 | 0 | 2  | 11 | 13 | 3  | 2  | 0  | 0 | <b>0.75</b> | 1.00 | 1.00      |     |        |
| 10.6  | 1 | 6 | 11 | 9  | 0  | 3  | 1  | 0  | 0 | <b>0.31</b> | 0.20 | 0.20      |     |        |
| 10.7  | 0 | 0 | 4  | 10 | 14 | 2  | 1  | 0  | 0 | <b>0.64</b> | 1.00 | 1.00      |     |        |
| 10.8  | 0 | 3 | 9  | 6  | 8  | 4  | 1  | 0  | 0 | <b>0.51</b> | 0.33 | 0.20      |     |        |
| 10.9  | 0 | 0 | 5  | 11 | 10 | 5  | 0  | 0  | 0 | <b>0.62</b> | 0.33 | 0.33      |     |        |
| 10.10 | 1 | 2 | 7  | 14 | 2  | 5  | 0  | 0  | 0 | <b>0.42</b> | 0.33 | 0.33      |     |        |
| 10.11 | 0 | 0 | 1  | 8  | 18 | 3  | 1  | 0  | 0 | <b>0.84</b> | 1.00 | 1.00      | n/a |        |

|       |   |   |    |    |    |    |   |   |   |             |      |           |     |
|-------|---|---|----|----|----|----|---|---|---|-------------|------|-----------|-----|
| 10.12 | 1 | 4 | 10 | 10 | 2  | 3  | 1 | 0 | 0 | <b>0.35</b> | 0.33 | 0.20/0.33 |     |
| 10.13 | 1 | 4 | 9  | 13 | 0  | 3  | 1 | 0 | 0 | <b>0.34</b> | 0.33 | 0.33      |     |
| 10.14 | 0 | 3 | 8  | 14 | 1  | 3  | 2 | 0 | 0 | <b>0.41</b> | 0.33 | 0.33      |     |
| 10.15 | 0 | 0 | 2  | 9  | 19 | 1  | 0 | 0 | 0 | <b>0.68</b> | 1.00 | 1.00      | n/a |
| 10.16 | 0 | 2 | 7  | 15 | 1  | 4  | 2 | 0 | 0 | <b>0.46</b> | 0.33 | 0.33      |     |
| 10.17 | 0 | 2 | 3  | 7  | 18 | 0  | 1 | 0 | 0 | <b>0.62</b> | 1.00 | 1.00      | n/a |
| 10.18 | 0 | 3 | 4  | 14 | 8  | 2  | 0 | 0 | 0 | <b>0.44</b> | 0.33 | 0.33      |     |
| 10.19 | 1 | 2 | 10 | 11 | 3  | 3  | 1 | 0 | 0 | <b>0.39</b> | 0.33 | 0.33      |     |
| 10.20 | 0 | 2 | 3  | 6  | 17 | 3  | 0 | 0 | 0 | <b>0.68</b> | 1.00 | 1.00      | n/a |
| 10.21 | 0 | 3 | 3  | 21 | 3  | 1  | 0 | 0 | 0 | <b>0.35</b> | 0.33 | 0.33      |     |
| 10.22 | 0 | 1 | 4  | 18 | 3  | 4  | 1 | 0 | 0 | <b>0.49</b> | 0.33 | 0.33      |     |
| 10.23 | 0 | 1 | 1  | 3  | 25 | 1  | 0 | 0 | 0 | <b>0.83</b> | 1.00 | 1.00      | n/a |
| 10.24 | 0 | 1 | 2  | 5  | 21 | 2  | 0 | 0 | 0 | <b>0.76</b> | 1.00 | 1.00      | n/a |
| 10.25 | 0 | 1 | 4  | 5  | 16 | 5  | 0 | 0 | 0 | <b>0.76</b> | 1.00 | 1.00      | n/a |
| 10.26 | 0 | 0 | 3  | 2  | 19 | 6  | 1 | 0 | 0 | <b>1.04</b> | 1.00 | 1.00      | n/a |
| 10.27 | 0 | 1 | 4  | 1  | 18 | 6  | 1 | 0 | 0 | <b>0.96</b> | 1.00 | 1.00      | n/a |
| 10.28 | 1 | 0 | 4  | 1  | 18 | 6  | 0 | 1 | 0 | <b>0.96</b> | 1.00 | 1.00      | n/a |
| 10.29 | 0 | 0 | 4  | 2  | 18 | 5  | 1 | 1 | 0 | <b>1.01</b> | 1.00 | 1.00      | n/a |
| 10.30 | 0 | 0 | 4  | 2  | 19 | 4  | 1 | 1 | 0 | <b>0.98</b> | 1.00 | 1.00      | n/a |
| 10.31 | 0 | 1 | 3  | 2  | 21 | 3  | 0 | 1 | 0 | <b>0.89</b> | 1.00 | 1.00      | n/a |
| 10.32 | 0 | 1 | 2  | 1  | 23 | 3  | 0 | 1 | 0 | <b>0.97</b> | 1.00 | 1.00      | n/a |
| 10.33 | 0 | 0 | 2  | 1  | 26 | 2  | 0 | 0 | 0 | <b>0.93</b> | 1.00 | 1.00      | n/a |
| 10.34 | 0 | 1 | 2  | 1  | 25 | 0  | 1 | 1 | 0 | <b>0.92</b> | 1.00 | 1.00      | n/a |
| 10.35 | 0 | 2 | 2  | 0  | 24 | 0  | 2 | 1 | 0 | <b>0.94</b> | 1.00 | 1.00      | n/a |
| 10.36 | 0 | 1 | 3  | 1  | 25 | 0  | 1 | 0 | 0 | <b>0.82</b> | 1.00 | 1.00      | n/a |
| 10.37 | 0 | 1 | 2  | 5  | 19 | 1  | 3 | 0 | 0 | <b>0.86</b> | 1.00 | 1.00      | n/a |
| 10.38 | 0 | 1 | 8  | 11 | 7  | 3  | 1 | 0 | 0 | <b>0.49</b> | 0.33 | 0.33      |     |
| 10.39 | 0 | 3 | 7  | 9  | 1  | 4  | 3 | 2 | 2 | <b>0.74</b> | 0.33 | 0.33      |     |
| 10.40 | 0 | 0 | 1  | 3  | 19 | 7  | 0 | 1 | 0 | <b>1.16</b> | 1.00 | 1.00      | n/a |
| 10.41 | 0 | 0 | 2  | 2  | 17 | 6  | 3 | 1 | 0 | <b>1.29</b> | 1.00 | 1.00      | n/a |
| 10.42 | 0 | 2 | 2  | 3  | 14 | 5  | 5 | 0 | 0 | <b>1.11</b> | 1.00 | 1.00      |     |
| 10.43 | 0 | 2 | 1  | 4  | 14 | 7  | 3 | 0 | 0 | <b>1.09</b> | 1.00 | 1.00      |     |
| 10.44 | 0 | 0 | 4  | 0  | 15 | 10 | 2 | 0 | 0 | <b>1.28</b> | 1.00 | 1.00      |     |
| 10.45 | 0 | 0 | 2  | 2  | 21 | 6  | 0 | 0 | 0 | <b>1.04</b> | 1.00 | 1.00      | n/a |
| 10.46 | 0 | 3 | 5  | 16 | 6  | 0  | 0 | 1 | 0 | <b>0.39</b> | 0.33 | 0.33      |     |
| 10.47 | 2 | 1 | 1  | 4  | 19 | 3  | 1 | 0 | 0 | <b>0.79</b> | 1.00 | 1.00      | n/a |
| 10.48 | 2 | 1 | 0  | 1  | 24 | 2  | 0 | 1 | 0 | <b>0.90</b> | 1.00 | 1.00      | n/a |
| 10.49 | 0 | 0 | 1  | 2  | 22 | 3  | 2 | 1 | 0 | <b>1.16</b> | 1.00 | 1.00      | n/a |
| 10.50 | 0 | 0 | 2  | 1  | 24 | 3  | 1 | 0 | 0 | <b>1.02</b> | 1.00 | 1.00      | n/a |
| 10.51 | 0 | 1 | 0  | 1  | 20 | 7  | 2 | 0 | 0 | <b>1.29</b> | 1.00 | 1.00      | n/a |
| 10.52 | 0 | 2 | 1  | 0  | 19 | 8  | 1 | 0 | 0 | <b>1.17</b> | 1.00 | 1.00      | n/a |
| 10.53 | 0 | 2 | 1  | 0  | 19 | 7  | 1 | 0 | 1 | <b>1.21</b> | 1.00 | 1.00      | n/a |
| 10.54 | 0 | 0 | 0  | 1  | 23 | 4  | 2 | 1 | 0 | <b>1.31</b> | 1.00 | 1.00      | n/a |
| 10.55 | 0 | 0 | 1  | 1  | 22 | 6  | 1 | 0 | 0 | <b>1.19</b> | 1.00 | 1.00      | n/a |
| 10.56 | 0 | 0 | 1  | 3  | 20 | 5  | 2 | 0 | 0 | <b>1.13</b> | 1.00 | 1.00      | n/a |
| 10.57 | 0 | 1 | 0  | 1  | 23 | 4  | 2 | 0 | 0 | <b>1.16</b> | 1.00 | 1.00      | n/a |
| 10.58 | 0 | 0 | 0  | 1  | 25 | 4  | 1 | 0 | 0 | <b>1.17</b> | 1.00 | 1.00      | n/a |
| 10.59 | 0 | 0 | 1  | 1  | 24 | 3  | 2 | 0 | 0 | <b>1.13</b> | 1.00 | 1.00      | n/a |
| 10.60 | 0 | 0 | 3  | 1  | 20 | 3  | 3 | 1 | 0 | <b>1.14</b> | 1.00 | 1.00      | n/a |
| 10.61 | 0 | 0 | 2  | 4  | 21 | 3  | 0 | 1 | 0 | <b>0.93</b> | 1.00 | 1.00      | n/a |
| 10.62 | 1 | 2 | 4  | 4  | 14 | 2  | 1 | 0 | 3 | <b>0.81</b> | 1.00 | 1.00      |     |
| 10.63 | 0 | 2 | 3  | 18 | 4  | 3  | 0 | 1 | 0 | <b>0.47</b> | 0.33 | 0.33      |     |
| 10.64 | 1 | 4 | 4  | 15 | 1  | 2  | 1 | 0 | 3 | <b>0.48</b> | 0.33 | 0.33      |     |
| 10.65 | 0 | 2 | 3  | 9  | 12 | 4  | 1 | 0 | 0 | <b>0.67</b> | 1.00 | 1.00      |     |
| 10.66 | 0 | 1 | 2  | 2  | 21 | 3  | 1 | 0 | 1 | <b>0.99</b> | 1.00 | 1.00      | n/a |
| 10.67 | 0 | 1 | 1  | 1  | 22 | 5  | 1 | 0 | 0 | <b>1.08</b> | 1.00 | 1.00      | n/a |
| 10.68 | 0 | 1 | 0  | 3  | 21 | 6  | 0 | 0 | 0 | <b>1.04</b> | 1.00 | 1.00      | n/a |
| 10.69 | 0 | 1 | 1  | 1  | 21 | 7  | 0 | 0 | 0 | <b>1.10</b> | 1.00 | 1.00      | n/a |
| 10.70 | 0 | 0 | 3  | 3  | 22 | 3  | 0 | 0 | 0 | <b>0.86</b> | 1.00 | 1.00      | n/a |
| 10.71 | 1 | 1 | 5  | 16 | 4  | 4  | 0 | 0 | 0 | <b>0.44</b> | 0.33 | 0.33      |     |

|        |   |   |    |    |    |    |    |   |   |             |      |      |     |
|--------|---|---|----|----|----|----|----|---|---|-------------|------|------|-----|
| 10.72  | 0 | 0 | 0  | 6  | 21 | 4  | 0  | 0 | 0 | <b>0.93</b> | 1.00 | 1.00 | n/a |
| 10.73  | 0 | 1 | 1  | 3  | 23 | 2  | 1  | 0 | 0 | <b>0.91</b> | 1.00 | 1.00 | n/a |
| 10.74  | 0 | 0 | 3  | 3  | 21 | 3  | 0  | 1 | 0 | <b>0.91</b> | 1.00 | 1.00 | n/a |
| 10.75  | 0 | 0 | 1  | 4  | 22 | 3  | 1  | 0 | 0 | <b>0.97</b> | 1.00 | 1.00 | n/a |
| 10.76  | 0 | 0 | 1  | 2  | 21 | 6  | 1  | 0 | 0 | <b>1.15</b> | 1.00 | 1.00 | n/a |
| 10.77  | 0 | 0 | 1  | 4  | 19 | 6  | 1  | 0 | 0 | <b>1.07</b> | 1.00 | 1.00 | n/a |
| 10.78  | 1 | 0 | 1  | 3  | 18 | 7  | 1  | 0 | 0 | <b>1.07</b> | 1.00 | 1.00 | n/a |
| 10.79  | 0 | 0 | 0  | 4  | 20 | 7  | 0  | 0 | 0 | <b>1.11</b> | 1.00 | 1.00 | n/a |
| 10.80  | 0 | 0 | 1  | 5  | 18 | 7  | 0  | 0 | 0 | <b>1.02</b> | 1.00 | 1.00 | n/a |
| 10.81  | 0 | 0 | 1  | 4  | 20 | 6  | 0  | 0 | 0 | <b>1.02</b> | 1.00 | 1.00 | n/a |
| 10.82  | 0 | 0 | 1  | 2  | 24 | 4  | 0  | 0 | 0 | <b>1.02</b> | 1.00 | 1.00 | n/a |
| 10.83  | 0 | 0 | 2  | 3  | 20 | 6  | 0  | 0 | 0 | <b>1.00</b> | 1.00 | 1.00 | n/a |
| 10.84  | 0 | 0 | 1  | 3  | 19 | 8  | 0  | 0 | 0 | <b>1.13</b> | 1.00 | 1.00 | n/a |
| 10.85  | 0 | 0 | 0  | 3  | 22 | 6  | 0  | 0 | 0 | <b>1.11</b> | 1.00 | 1.00 | n/a |
| 10.86  | 0 | 1 | 2  | 5  | 21 | 2  | 0  | 0 | 0 | <b>0.76</b> | 1.00 | 1.00 | n/a |
| 10.87  | 2 | 2 | 2  | 15 | 7  | 2  | 1  | 0 | 0 | <b>0.46</b> | 0.33 | 0.33 |     |
| 10.88  | 1 | 4 | 7  | 12 | 1  | 4  | 0  | 0 | 2 | <b>0.44</b> | 0.33 | 0.33 |     |
| 10.89  | 0 | 2 | 0  | 2  | 3  | 9  | 13 | 1 | 1 | <b>2.54</b> | 3.00 | 5.00 |     |
| 10.90  | 0 | 0 | 3  | 1  | 17 | 7  | 2  | 1 | 0 | <b>1.25</b> | 1.00 | 1.00 | n/a |
| 10.91  | 0 | 1 | 1  | 1  | 18 | 5  | 4  | 1 | 0 | <b>1.35</b> | 1.00 | 1.00 | n/a |
| 10.92  | 0 | 1 | 1  | 2  | 19 | 2  | 5  | 1 | 0 | <b>1.23</b> | 1.00 | 1.00 | n/a |
| 10.93  | 2 | 0 | 2  | 2  | 19 | 4  | 1  | 1 | 0 | <b>0.94</b> | 1.00 | 1.00 | n/a |
| 10.94  | 0 | 2 | 1  | 2  | 22 | 3  | 1  | 0 | 0 | <b>0.91</b> | 1.00 | 1.00 | n/a |
| 10.95  | 0 | 4 | 4  | 10 | 8  | 3  | 2  | 0 | 0 | <b>0.55</b> | 0.33 | 0.33 |     |
| 10.96  | 0 | 2 | 9  | 12 | 3  | 2  | 3  | 0 | 0 | <b>0.45</b> | 0.33 | 0.33 |     |
| 10.97  | 0 | 2 | 5  | 4  | 19 | 1  | 0  | 0 | 0 | <b>0.61</b> | 1.00 | 1.00 | n/a |
| 10.98  | 0 | 0 | 3  | 4  | 22 | 2  | 0  | 0 | 0 | <b>0.80</b> | 1.00 | 1.00 | n/a |
| 10.99  | 0 | 2 | 3  | 4  | 17 | 3  | 2  | 0 | 0 | <b>0.81</b> | 1.00 | 1.00 | n/a |
| 10.100 | 0 | 2 | 2  | 5  | 19 | 3  | 0  | 0 | 0 | <b>0.74</b> | 1.00 | 1.00 | n/a |
| 10.101 | 2 | 0 | 0  | 4  | 20 | 4  | 1  | 0 | 0 | <b>0.91</b> | 1.00 | 1.00 | n/a |
| 10.102 | 0 | 0 | 0  | 3  | 23 | 3  | 2  | 0 | 0 | <b>1.11</b> | 1.00 | 1.00 | n/a |
| 10.103 | 0 | 1 | 0  | 3  | 22 | 3  | 1  | 1 | 0 | <b>1.05</b> | 1.00 | 1.00 | n/a |
| 10.104 | 1 | 1 | 1  | 5  | 15 | 5  | 2  | 1 | 0 | <b>0.98</b> | 1.00 | 1.00 |     |
| 10.105 | 0 | 1 | 1  | 5  | 15 | 5  | 2  | 0 | 2 | <b>1.14</b> | 1.00 | 1.00 |     |
| 10.106 | 0 | 1 | 0  | 2  | 20 | 7  | 1  | 0 | 0 | <b>1.18</b> | 1.00 | 1.00 | n/a |
| 10.107 | 2 | 0 | 2  | 13 | 9  | 3  | 2  | 0 | 0 | <b>0.61</b> | 0.33 | 0.33 |     |
| 10.108 | 1 | 1 | 1  | 2  | 19 | 5  | 2  | 0 | 0 | <b>1.02</b> | 1.00 | 1.00 | n/a |
| 10.109 | 1 | 1 | 1  | 1  | 17 | 7  | 2  | 0 | 1 | <b>1.22</b> | 1.00 | 1.00 | n/a |
| 10.110 | 0 | 0 | 3  | 1  | 17 | 7  | 2  | 0 | 1 | <b>1.26</b> | 1.00 | 1.00 | n/a |
| 10.111 | 3 | 1 | 5  | 8  | 6  | 2  | 3  | 1 | 2 | <b>0.68</b> | 0.33 | 0.33 |     |
| 10.112 | 0 | 2 | 5  | 3  | 13 | 4  | 3  | 1 | 0 | <b>0.88</b> | 1.00 | 1.00 |     |
| 10.113 | 0 | 2 | 10 | 9  | 1  | 1  | 4  | 1 | 3 | <b>0.64</b> | 0.33 | 0.20 |     |
| 10.114 | 0 | 0 | 2  | 3  | 7  | 10 | 7  | 2 | 0 | <b>1.88</b> | 3.00 | 3.00 |     |
| 10.115 | 1 | 0 | 1  | 4  | 8  | 14 | 2  | 1 | 0 | <b>1.49</b> | 3.00 | 3.00 |     |
| 10.116 | 0 | 1 | 1  | 0  | 22 | 5  | 1  | 1 | 0 | <b>1.19</b> | 1.00 | 1.00 | n/a |
| 10.117 | 0 | 1 | 0  | 0  | 20 | 8  | 2  | 0 | 0 | <b>1.38</b> | 1.00 | 1.00 | n/a |
| 10.118 | 0 | 1 | 0  | 1  | 26 | 3  | 0  | 0 | 0 | <b>1.01</b> | 1.00 | 1.00 | n/a |
| 10.119 | 0 | 0 | 0  | 1  | 27 | 3  | 0  | 0 | 0 | <b>1.07</b> | 1.00 | 1.00 | n/a |
| 10.120 | 0 | 1 | 3  | 2  | 14 | 6  | 3  | 1 | 1 | <b>1.24</b> | 1.00 | 1.00 |     |
| 10.121 | 0 | 3 | 5  | 3  | 2  | 8  | 4  | 4 | 2 | <b>1.39</b> | 3.00 | 3.00 |     |
| 10.122 | 1 | 1 | 2  | 3  | 8  | 15 | 0  | 1 | 0 | <b>1.28</b> | 3.00 | 3.00 |     |
| 10.123 | 0 | 1 | 3  | 1  | 20 | 4  | 1  | 0 | 1 | <b>1.01</b> | 1.00 | 1.00 | n/a |
| 10.124 | 3 | 2 | 0  | 3  | 1  | 10 | 12 | 0 | 0 | <b>1.70</b> | 3.00 | 5.00 |     |
| 10.125 | 1 | 4 | 0  | 4  | 3  | 11 | 6  | 1 | 1 | <b>1.45</b> | 3.00 | 3.00 |     |
| 10.126 | 0 | 1 | 1  | 1  | 1  | 15 | 9  | 3 | 0 | <b>2.82</b> | 3.00 | 3.00 |     |
| 10.127 | 0 | 1 | 0  | 0  | 4  | 16 | 8  | 2 | 0 | <b>2.84</b> | 3.00 | 3.00 |     |
| 10.128 | 0 | 1 | 0  | 0  | 11 | 10 | 6  | 1 | 2 | <b>2.24</b> | 3.00 | 1.00 |     |
| 10.129 | 0 | 0 | 1  | 0  | 1  | 7  | 10 | 9 | 3 | <b>4.45</b> | 5.00 | 5.00 |     |
| 10.130 | 0 | 0 | 0  | 1  | 1  | 9  | 10 | 9 | 1 | <b>4.21</b> | 5.00 | 5.00 |     |
| 10.131 | 0 | 2 | 3  | 3  | 17 | 4  | 2  | 0 | 0 | <b>0.87</b> | 1.00 | 1.00 | n/a |

|        |   |   |    |    |    |    |    |   |   |             |      |           |     |
|--------|---|---|----|----|----|----|----|---|---|-------------|------|-----------|-----|
| 10.132 | 0 | 1 | 2  | 4  | 17 | 2  | 5  | 0 | 0 | <b>1.02</b> | 1.00 | 1.00      | n/a |
| 10.133 | 0 | 4 | 1  | 3  | 17 | 1  | 2  | 3 | 0 | <b>0.92</b> | 1.00 | 1.00      | n/a |
| 10.134 | 0 | 0 | 3  | 5  | 18 | 3  | 2  | 0 | 0 | <b>0.88</b> | 1.00 | 1.00      | n/a |
| 10.135 | 0 | 1 | 4  | 2  | 19 | 4  | 1  | 0 | 0 | <b>0.86</b> | 1.00 | 1.00      | n/a |
| 10.136 | 0 | 1 | 0  | 0  | 21 | 3  | 5  | 1 | 0 | <b>1.44</b> | 1.00 | 1.00      | n/a |
| 10.137 | 0 | 0 | 0  | 0  | 22 | 4  | 5  | 0 | 0 | <b>1.49</b> | 1.00 | 1.00      | n/a |
| 10.138 | 0 | 0 | 1  | 1  | 26 | 3  | 0  | 0 | 0 | <b>1.02</b> | 1.00 | 1.00      | n/a |
| 10.139 | 0 | 0 | 2  | 0  | 27 | 2  | 0  | 0 | 0 | <b>0.97</b> | 1.00 | 1.00      | n/a |
| 10.140 | 0 | 4 | 9  | 8  | 4  | 4  | 2  | 0 | 0 | <b>0.47</b> | 0.33 | 0.20      |     |
| 10.141 | 0 | 4 | 2  | 3  | 18 | 4  | 0  | 0 | 0 | <b>0.73</b> | 1.00 | 1.00      | n/a |
| 10.142 | 1 | 3 | 2  | 10 | 10 | 2  | 2  | 1 | 0 | <b>0.62</b> | 0.33 | 0.33/1.00 |     |
| 10.143 | 0 | 1 | 4  | 2  | 9  | 12 | 1  | 2 | 0 | <b>1.30</b> | 1.00 | 3.00      |     |
| 10.144 | 0 | 2 | 4  | 2  | 19 | 3  | 1  | 0 | 0 | <b>0.78</b> | 1.00 | 1.00      | n/a |
| 10.145 | 0 | 2 | 4  | 2  | 19 | 4  | 0  | 0 | 0 | <b>0.77</b> | 1.00 | 1.00      | n/a |
| 10.146 | 0 | 1 | 2  | 0  | 2  | 16 | 8  | 1 | 1 | <b>2.58</b> | 3.00 | 3.00      |     |
| 10.147 | 0 | 1 | 2  | 0  | 16 | 8  | 3  | 1 | 0 | <b>1.40</b> | 1.00 | 1.00      | n/a |
| 10.148 | 0 | 1 | 4  | 9  | 6  | 6  | 5  | 0 | 0 | <b>0.89</b> | 1.00 | 0.33      |     |
| 10.149 | 0 | 0 | 1  | 3  | 17 | 3  | 7  | 0 | 0 | <b>1.37</b> | 1.00 | 1.00      | n/a |
| 10.150 | 0 | 0 | 2  | 1  | 4  | 8  | 12 | 2 | 2 | <b>2.81</b> | 5.00 | 5.00      |     |
| 10.151 | 1 | 1 | 8  | 9  | 6  | 1  | 5  | 0 | 0 | <b>0.56</b> | 0.33 | 0.33      |     |
| 10.152 | 0 | 4 | 10 | 10 | 4  | 2  | 1  | 0 | 0 | <b>0.37</b> | 0.33 | 0.20/0.33 |     |
| 10.153 | 1 | 1 | 8  | 9  | 2  | 3  | 2  | 5 | 0 | <b>0.71</b> | 0.33 | 0.33      |     |
| 10.154 | 0 | 0 | 5  | 7  | 5  | 8  | 4  | 2 | 0 | <b>1.12</b> | 1.00 | 3.00      |     |
| 10.155 | 0 | 0 | 8  | 12 | 9  | 2  | 0  | 0 | 0 | <b>0.46</b> | 0.33 | 0.33      |     |
| 10.156 | 1 | 0 | 0  | 1  | 19 | 4  | 4  | 2 | 0 | <b>1.45</b> | 1.00 | 1.00      | n/a |
| 10.157 | 2 | 1 | 1  | 1  | 21 | 5  | 0  | 0 | 0 | <b>0.89</b> | 1.00 | 1.00      | n/a |
| 10.158 | 2 | 1 | 0  | 3  | 23 | 2  | 0  | 0 | 0 | <b>0.79</b> | 1.00 | 1.00      | n/a |
| 10.159 | 2 | 0 | 2  | 1  | 24 | 2  | 0  | 0 | 0 | <b>0.81</b> | 1.00 | 1.00      | n/a |
| 10.160 | 1 | 3 | 7  | 8  | 6  | 5  | 1  | 0 | 0 | <b>0.51</b> | 0.33 | 0.33      |     |
| 10.161 | 0 | 6 | 8  | 12 | 1  | 2  | 2  | 0 | 0 | <b>0.35</b> | 0.33 | 0.33      |     |
| 10.162 | 1 | 2 | 7  | 13 | 5  | 3  | 0  | 0 | 0 | <b>0.40</b> | 0.33 | 0.33      |     |
| 10.163 | 0 | 0 | 3  | 5  | 18 | 4  | 1  | 0 | 0 | <b>0.87</b> | 1.00 | 1.00      | n/a |
| 10.164 | 0 | 2 | 5  | 7  | 14 | 1  | 2  | 0 | 0 | <b>0.61</b> | 1.00 | 1.00      |     |
| 10.165 | 0 | 2 | 6  | 5  | 17 | 1  | 0  | 0 | 0 | <b>0.56</b> | 1.00 | 1.00      | n/a |
| 10.166 | 0 | 0 | 2  | 0  | 2  | 15 | 9  | 1 | 2 | <b>3.00</b> | 3.00 | 3.00      |     |
| 10.167 | 0 | 0 | 1  | 0  | 7  | 14 | 7  | 0 | 2 | <b>2.58</b> | 3.00 | 3.00      |     |
| 10.168 | 0 | 1 | 5  | 1  | 18 | 3  | 3  | 0 | 0 | <b>0.91</b> | 1.00 | 1.00      | n/a |
| 10.169 | 0 | 0 | 1  | 1  | 6  | 8  | 14 | 1 | 0 | <b>2.68</b> | 3.00 | 5.00      |     |
| 10.170 | 0 | 0 | 1  | 1  | 3  | 8  | 14 | 4 | 0 | <b>3.24</b> | 5.00 | 5.00      |     |
| 10.171 | 0 | 1 | 3  | 3  | 16 | 6  | 2  | 0 | 0 | <b>0.99</b> | 1.00 | 1.00      | n/a |
| 10.172 | 0 | 2 | 5  | 13 | 2  | 3  | 6  | 0 | 0 | <b>0.65</b> | 0.33 | 0.33      |     |
| 10.173 | 0 | 1 | 7  | 11 | 2  | 2  | 6  | 2 | 0 | <b>0.73</b> | 0.33 | 0.33      |     |
| 10.174 | 0 | 1 | 4  | 5  | 6  | 10 | 4  | 1 | 0 | <b>1.19</b> | 1.00 | 3.00      |     |
| 10.175 | 0 | 0 | 3  | 5  | 15 | 8  | 0  | 0 | 0 | <b>0.95</b> | 1.00 | 1.00      |     |
| 10.176 | 0 | 1 | 0  | 1  | 17 | 9  | 1  | 2 | 0 | <b>1.49</b> | 1.00 | 1.00      | n/a |
| 10.177 | 2 | 0 | 1  | 2  | 20 | 5  | 1  | 0 | 0 | <b>0.97</b> | 1.00 | 1.00      | n/a |
| 10.178 | 2 | 1 | 0  | 3  | 23 | 2  | 0  | 0 | 0 | <b>0.79</b> | 1.00 | 1.00      | n/a |
| 10.179 | 3 | 0 | 0  | 2  | 24 | 2  | 0  | 0 | 0 | <b>0.81</b> | 1.00 | 1.00      | n/a |
| 10.180 | 3 | 5 | 4  | 6  | 6  | 7  | 0  | 0 | 0 | <b>0.50</b> | 0.33 | 3.00      |     |
| 10.181 | 2 | 3 | 7  | 13 | 2  | 2  | 2  | 0 | 0 | <b>0.38</b> | 0.33 | 0.33      |     |
| 10.182 | 2 | 7 | 4  | 11 | 4  | 3  | 0  | 0 | 0 | <b>0.34</b> | 0.33 | 0.33      |     |
| 10.183 | 0 | 2 | 4  | 10 | 9  | 4  | 1  | 1 | 0 | <b>0.65</b> | 0.33 | 0.33      |     |
| 10.184 | 0 | 3 | 2  | 6  | 17 | 1  | 0  | 2 | 0 | <b>0.71</b> | 1.00 | 1.00      | n/a |
| 10.185 | 0 | 2 | 5  | 2  | 21 | 1  | 0  | 0 | 0 | <b>0.66</b> | 1.00 | 1.00      | n/a |
| 10.186 | 1 | 0 | 1  | 3  | 15 | 7  | 2  | 2 | 0 | <b>1.28</b> | 1.00 | 1.00      |     |
| 10.187 | 0 | 1 | 1  | 3  | 4  | 17 | 4  | 1 | 0 | <b>1.92</b> | 3.00 | 3.00      |     |
| 10.188 | 0 | 1 | 2  | 3  | 17 | 6  | 1  | 1 | 0 | <b>1.06</b> | 1.00 | 1.00      | n/a |
| 10.189 | 2 | 4 | 0  | 4  | 1  | 11 | 7  | 0 | 2 | <b>1.43</b> | 3.00 | 3.00      |     |
| 10.190 | 2 | 1 | 0  | 2  | 1  | 10 | 11 | 3 | 1 | <b>2.48</b> | 3.00 | 5.00      |     |
| 10.191 | 0 | 0 | 5  | 14 | 4  | 3  | 3  | 2 | 0 | <b>0.69</b> | 0.33 | 0.33      |     |

|        |   |   |    |    |    |    |   |   |   |             |      |      |     |
|--------|---|---|----|----|----|----|---|---|---|-------------|------|------|-----|
| 10.192 | 0 | 2 | 5  | 12 | 9  | 2  | 1 | 0 | 0 | <b>0.50</b> | 0.33 | 0.33 |     |
| 10.193 | 0 | 1 | 6  | 13 | 1  | 2  | 4 | 2 | 2 | <b>0.75</b> | 0.33 | 0.33 |     |
| 10.194 | 0 | 2 | 2  | 5  | 7  | 11 | 4 | 0 | 0 | <b>1.21</b> | 1.00 | 3.00 |     |
| 10.195 | 0 | 0 | 4  | 7  | 6  | 10 | 4 | 0 | 0 | <b>1.11</b> | 1.00 | 3.00 |     |
| 10.196 | 1 | 0 | 0  | 2  | 19 | 8  | 1 | 0 | 0 | <b>1.21</b> | 1.00 | 1.00 | n/a |
| 10.197 | 1 | 2 | 0  | 3  | 21 | 3  | 1 | 0 | 0 | <b>0.87</b> | 1.00 | 1.00 | n/a |
| 10.198 | 0 | 2 | 2  | 2  | 21 | 4  | 0 | 0 | 0 | <b>0.85</b> | 1.00 | 1.00 | n/a |
| 10.199 | 0 | 3 | 2  | 1  | 21 | 4  | 0 | 0 | 0 | <b>0.83</b> | 1.00 | 1.00 | n/a |
| 10.200 | 0 | 2 | 3  | 11 | 6  | 9  | 0 | 0 | 0 | <b>0.70</b> | 0.33 | 0.33 |     |
| 10.201 | 0 | 1 | 3  | 16 | 1  | 2  | 8 | 0 | 0 | <b>0.74</b> | 0.33 | 0.33 |     |
| 10.202 | 0 | 2 | 4  | 13 | 3  | 5  | 4 | 0 | 0 | <b>0.66</b> | 0.33 | 0.33 |     |
| 10.203 | 0 | 1 | 1  | 18 | 3  | 5  | 3 | 0 | 0 | <b>0.66</b> | 0.33 | 0.33 |     |
| 10.204 | 0 | 2 | 10 | 9  | 4  | 2  | 2 | 2 | 0 | <b>0.52</b> | 0.33 | 0.20 |     |
| 10.205 | 0 | 2 | 11 | 7  | 7  | 3  | 1 | 0 | 0 | <b>0.46</b> | 0.33 | 0.20 |     |
| 10.206 | 0 | 0 | 0  | 2  | 17 | 6  | 3 | 3 | 0 | <b>1.63</b> | 1.00 | 1.00 | n/a |
| 10.207 | 0 | 0 | 0  | 2  | 8  | 12 | 8 | 1 | 0 | <b>2.30</b> | 3.00 | 3.00 |     |
| 10.208 | 0 | 0 | 0  | 3  | 17 | 8  | 1 | 2 | 0 | <b>1.43</b> | 1.00 | 1.00 | n/a |
| 10.209 | 0 | 5 | 0  | 2  | 2  | 13 | 7 | 2 | 0 | <b>1.76</b> | 3.00 | 3.00 |     |
| 10.210 | 1 | 0 | 3  | 3  | 1  | 12 | 7 | 4 | 0 | <b>2.03</b> | 3.00 | 3.00 |     |
| 10.211 | 0 | 2 | 4  | 11 | 5  | 8  | 1 | 0 | 0 | <b>0.68</b> | 0.33 | 0.33 |     |
| 10.212 | 0 | 0 | 7  | 11 | 4  | 3  | 6 | 0 | 0 | <b>0.72</b> | 0.33 | 0.33 |     |
| 10.213 | 0 | 2 | 4  | 13 | 0  | 5  | 5 | 2 | 0 | <b>0.79</b> | 0.33 | 0.33 |     |
| 10.214 | 2 | 0 | 2  | 5  | 6  | 9  | 6 | 1 | 0 | <b>1.31</b> | 3.00 | 3.00 |     |
| 10.215 | 0 | 0 | 5  | 13 | 3  | 6  | 4 | 0 | 0 | <b>0.74</b> | 0.33 | 0.33 |     |
| 10.216 | 0 | 0 | 0  | 0  | 20 | 8  | 2 | 1 | 0 | <b>1.57</b> | 1.00 | 1.00 | n/a |
| 10.217 | 0 | 0 | 0  | 1  | 20 | 10 | 0 | 0 | 0 | <b>1.38</b> | 1.00 | 1.00 | n/a |
| 10.218 | 2 | 1 | 1  | 0  | 25 | 2  | 0 | 0 | 0 | <b>0.83</b> | 1.00 | 1.00 | n/a |
| 10.219 | 2 | 1 | 1  | 1  | 24 | 0  | 2 | 0 | 0 | <b>0.83</b> | 1.00 | 1.00 | n/a |
| 10.220 | 0 | 0 | 5  | 12 | 4  | 4  | 6 | 0 | 0 | <b>0.79</b> | 0.33 | 0.33 |     |
| 10.221 | 0 | 1 | 3  | 7  | 3  | 13 | 4 | 0 | 0 | <b>1.22</b> | 3.00 | 3.00 |     |
| 10.222 | 0 | 2 | 5  | 13 | 2  | 6  | 2 | 1 | 0 | <b>0.63</b> | 0.33 | 0.33 |     |
| 10.223 | 0 | 1 | 4  | 15 | 2  | 8  | 0 | 1 | 0 | <b>0.63</b> | 0.33 | 0.33 |     |
| 10.224 | 0 | 3 | 1  | 15 | 5  | 7  | 0 | 0 | 0 | <b>0.59</b> | 0.33 | 0.33 |     |
| 10.225 | 1 | 2 | 1  | 15 | 8  | 4  | 0 | 0 | 0 | <b>0.53</b> | 0.33 | 0.33 |     |
| 10.226 | 0 | 0 | 2  | 6  | 21 | 1  | 1 | 0 | 0 | <b>0.80</b> | 1.00 | 1.00 | n/a |
| 10.227 | 0 | 0 | 6  | 4  | 19 | 1  | 1 | 0 | 0 | <b>0.69</b> | 1.00 | 1.00 | n/a |
| 10.228 | 0 | 0 | 6  | 6  | 15 | 1  | 3 | 0 | 0 | <b>0.72</b> | 1.00 | 1.00 |     |
| 10.229 | 0 | 0 | 5  | 5  | 14 | 6  | 1 | 0 | 0 | <b>0.84</b> | 1.00 | 1.00 |     |
| 10.230 | 0 | 0 | 3  | 6  | 16 | 6  | 0 | 0 | 0 | <b>0.86</b> | 1.00 | 1.00 | n/a |
| 10.231 | 0 | 1 | 1  | 3  | 19 | 6  | 0 | 1 | 0 | <b>1.06</b> | 1.00 | 1.00 | n/a |
| 10.232 | 0 | 0 | 2  | 4  | 19 | 6  | 0 | 0 | 0 | <b>0.97</b> | 1.00 | 1.00 | n/a |
| 10.233 | 2 | 0 | 1  | 5  | 20 | 1  | 0 | 1 | 1 | <b>0.82</b> | 1.00 | 1.00 | n/a |
| 10.234 | 2 | 0 | 1  | 4  | 22 | 0  | 1 | 1 | 0 | <b>0.80</b> | 1.00 | 1.00 | n/a |
| 10.235 | 0 | 2 | 6  | 11 | 4  | 3  | 4 | 1 | 0 | <b>0.64</b> | 0.33 | 0.33 |     |
| 10.236 | 0 | 1 | 2  | 17 | 1  | 7  | 1 | 1 | 1 | <b>0.72</b> | 0.33 | 0.33 |     |
| 10.237 | 0 | 2 | 1  | 14 | 6  | 6  | 1 | 1 | 0 | <b>0.71</b> | 0.33 | 0.33 |     |
| 10.238 | 0 | 0 | 2  | 5  | 16 | 4  | 3 | 1 | 0 | <b>1.08</b> | 1.00 | 1.00 | n/a |
| 10.239 | 0 | 1 | 4  | 5  | 15 | 2  | 2 | 2 | 0 | <b>0.86</b> | 1.00 | 1.00 |     |
| 10.240 | 0 | 1 | 4  | 4  | 17 | 3  | 1 | 1 | 0 | <b>0.83</b> | 1.00 | 1.00 | n/a |
| 10.241 | 0 | 2 | 7  | 11 | 8  | 3  | 0 | 0 | 0 | <b>0.46</b> | 0.33 | 0.33 |     |
| 10.242 | 0 | 0 | 4  | 15 | 10 | 2  | 0 | 0 | 0 | <b>0.51</b> | 0.33 | 0.33 |     |
| 10.243 | 0 | 0 | 5  | 15 | 1  | 6  | 2 | 1 | 1 | <b>0.71</b> | 0.33 | 0.33 |     |
| 10.244 | 0 | 0 | 5  | 6  | 3  | 13 | 2 | 1 | 1 | <b>1.25</b> | 3.00 | 3.00 |     |
| 10.245 | 0 | 0 | 3  | 7  | 14 | 4  | 2 | 1 | 0 | <b>0.91</b> | 1.00 | 1.00 |     |
| 10.246 | 0 | 0 | 0  | 3  | 24 | 3  | 0 | 1 | 0 | <b>1.06</b> | 1.00 | 1.00 | n/a |
| 10.247 | 0 | 0 | 0  | 5  | 22 | 4  | 0 | 0 | 0 | <b>0.97</b> | 1.00 | 1.00 | n/a |
| 10.248 | 2 | 1 | 0  | 4  | 24 | 0  | 0 | 0 | 0 | <b>0.71</b> | 1.00 | 1.00 | n/a |
| 10.249 | 2 | 1 | 0  | 4  | 24 | 0  | 0 | 0 | 0 | <b>0.71</b> | 1.00 | 1.00 | n/a |
| 10.250 | 0 | 1 | 5  | 12 | 5  | 6  | 2 | 0 | 0 | <b>0.65</b> | 0.33 | 0.33 |     |
| 10.251 | 0 | 1 | 2  | 16 | 1  | 9  | 2 | 0 | 0 | <b>0.73</b> | 0.33 | 0.33 |     |

|        |   |   |    |    |    |    |   |   |   |             |      |           |     |
|--------|---|---|----|----|----|----|---|---|---|-------------|------|-----------|-----|
| 10.252 | 0 | 2 | 3  | 14 | 4  | 5  | 3 | 0 | 0 | <b>0.64</b> | 0.33 | 0.33      |     |
| 10.253 | 0 | 2 | 3  | 3  | 9  | 8  | 5 | 1 | 0 | <b>1.24</b> | 1.00 | 1.00      |     |
| 10.254 | 0 | 1 | 10 | 8  | 5  | 2  | 5 | 0 | 0 | <b>0.59</b> | 0.33 | 0.20      |     |
| 10.255 | 0 | 2 | 8  | 10 | 7  | 2  | 2 | 0 | 0 | <b>0.49</b> | 0.33 | 0.33      |     |
| 10.256 | 1 | 1 | 1  | 6  | 19 | 2  | 1 | 0 | 0 | <b>0.76</b> | 1.00 | 1.00      | n/a |
| 10.257 | 0 | 1 | 4  | 5  | 17 | 3  | 1 | 0 | 0 | <b>0.75</b> | 1.00 | 1.00      | n/a |
| 10.258 | 0 | 1 | 5  | 4  | 14 | 4  | 1 | 1 | 1 | <b>0.87</b> | 1.00 | 1.00      |     |
| 10.259 | 0 | 0 | 4  | 7  | 14 | 2  | 2 | 1 | 1 | <b>0.86</b> | 1.00 | 1.00      |     |
| 10.260 | 0 | 0 | 3  | 5  | 19 | 3  | 1 | 0 | 0 | <b>0.84</b> | 1.00 | 1.00      | n/a |
| 10.261 | 0 | 0 | 1  | 2  | 23 | 3  | 1 | 1 | 0 | <b>1.10</b> | 1.00 | 1.00      | n/a |
| 10.262 | 0 | 2 | 0  | 4  | 21 | 4  | 0 | 0 | 0 | <b>0.88</b> | 1.00 | 1.00      | n/a |
| 10.263 | 2 | 0 | 1  | 3  | 23 | 0  | 2 | 0 | 0 | <b>0.82</b> | 1.00 | 1.00      | n/a |
| 10.264 | 2 | 1 | 0  | 4  | 22 | 0  | 2 | 0 | 0 | <b>0.78</b> | 1.00 | 1.00      | n/a |
| 10.265 | 1 | 0 | 5  | 15 | 6  | 2  | 2 | 0 | 0 | <b>0.50</b> | 0.33 | 0.33      |     |
| 10.266 | 0 | 1 | 2  | 9  | 13 | 4  | 2 | 0 | 0 | <b>0.79</b> | 1.00 | 1.00      |     |
| 10.267 | 1 | 2 | 2  | 13 | 9  | 1  | 3 | 0 | 0 | <b>0.57</b> | 0.33 | 0.33      |     |
| 10.268 | 0 | 1 | 1  | 6  | 17 | 2  | 3 | 1 | 0 | <b>0.96</b> | 1.00 | 1.00      | n/a |
| 10.269 | 2 | 1 | 2  | 6  | 14 | 4  | 2 | 0 | 0 | <b>0.76</b> | 1.00 | 1.00      |     |
| 10.270 | 1 | 1 | 3  | 6  | 16 | 2  | 2 | 0 | 0 | <b>0.72</b> | 1.00 | 1.00      | n/a |
| 10.271 | 1 | 3 | 11 | 12 | 0  | 1  | 3 | 0 | 0 | <b>0.34</b> | 0.33 | 0.33      |     |
| 10.272 | 0 | 0 | 6  | 5  | 9  | 7  | 2 | 2 | 0 | <b>0.99</b> | 1.00 | 1.00      |     |
| 10.273 | 0 | 2 | 2  | 8  | 8  | 5  | 5 | 1 | 0 | <b>0.99</b> | 1.00 | 0.33/1.00 |     |
| 10.274 | 0 | 1 | 3  | 13 | 9  | 5  | 0 | 0 | 0 | <b>0.61</b> | 0.33 | 0.33      |     |
| 10.275 | 1 | 0 | 7  | 13 | 0  | 8  | 2 | 0 | 0 | <b>0.60</b> | 0.33 | 0.33      |     |
| 10.276 | 0 | 0 | 0  | 2  | 21 | 7  | 0 | 1 | 0 | <b>1.27</b> | 1.00 | 1.00      | n/a |
| 10.277 | 0 | 2 | 0  | 2  | 21 | 5  | 1 | 0 | 0 | <b>1.03</b> | 1.00 | 1.00      | n/a |
| 10.278 | 0 | 0 | 4  | 1  | 26 | 0  | 0 | 0 | 0 | <b>0.78</b> | 1.00 | 1.00      | n/a |
| 10.279 | 0 | 1 | 3  | 1  | 24 | 2  | 0 | 0 | 0 | <b>0.83</b> | 1.00 | 1.00      | n/a |
| 10.280 | 0 | 2 | 6  | 9  | 2  | 8  | 3 | 1 | 0 | <b>0.78</b> | 0.33 | 0.33      |     |
| 10.281 | 0 | 3 | 3  | 15 | 0  | 1  | 8 | 1 | 0 | <b>0.70</b> | 0.33 | 0.33      |     |
| 10.282 | 1 | 3 | 6  | 10 | 2  | 1  | 6 | 2 | 0 | <b>0.64</b> | 0.33 | 0.33      |     |
| 10.283 | 1 | 1 | 4  | 2  | 5  | 11 | 5 | 2 | 0 | <b>1.44</b> | 3.00 | 3.00      |     |
| 10.284 | 2 | 4 | 9  | 7  | 0  | 0  | 4 | 3 | 2 | <b>0.57</b> | 0.33 | 0.20      |     |
| 10.285 | 1 | 5 | 7  | 7  | 3  | 4  | 3 | 1 | 0 | <b>0.53</b> | 0.33 | 0.20/0.33 |     |
| 10.286 | 1 | 0 | 9  | 10 | 7  | 2  | 2 | 0 | 0 | <b>0.49</b> | 0.33 | 0.33      |     |
| 10.287 | 0 | 2 | 13 | 6  | 7  | 2  | 1 | 0 | 0 | <b>0.41</b> | 0.33 | 0.20      |     |
| 10.288 | 0 | 1 | 8  | 11 | 7  | 3  | 0 | 1 | 0 | <b>0.50</b> | 0.33 | 0.33      |     |
| 10.289 | 0 | 1 | 12 | 7  | 5  | 3  | 3 | 0 | 0 | <b>0.51</b> | 0.33 | 0.20      |     |
| 10.290 | 0 | 0 | 10 | 12 | 7  | 1  | 1 | 0 | 0 | <b>0.42</b> | 0.33 | 0.33      |     |
| 10.291 | 0 | 0 | 5  | 17 | 3  | 2  | 1 | 1 | 2 | <b>0.59</b> | 0.33 | 0.33      |     |
| 10.292 | 0 | 0 | 3  | 18 | 6  | 2  | 0 | 0 | 2 | <b>0.56</b> | 0.33 | 0.33      |     |
| 10.293 | 2 | 0 | 10 | 8  | 11 | 0  | 0 | 0 | 0 | <b>0.39</b> | 0.33 | 1.00      |     |
| 10.294 | 2 | 1 | 9  | 11 | 8  | 0  | 0 | 0 | 0 | <b>0.35</b> | 0.33 | 0.33      |     |
| 10.295 | 1 | 1 | 13 | 10 | 2  | 4  | 0 | 0 | 0 | <b>0.36</b> | 0.33 | 0.20      |     |
| 10.296 | 0 | 1 | 11 | 9  | 6  | 2  | 2 | 0 | 0 | <b>0.46</b> | 0.33 | 0.20      |     |
| 10.297 | 0 | 1 | 12 | 8  | 4  | 4  | 0 | 2 | 0 | <b>0.50</b> | 0.33 | 0.20      |     |
| 10.298 | 0 | 0 | 6  | 7  | 12 | 4  | 0 | 2 | 0 | <b>0.75</b> | 1.00 | 1.00      |     |
| 10.299 | 1 | 1 | 10 | 9  | 7  | 1  | 0 | 2 | 0 | <b>0.44</b> | 0.33 | 0.20      |     |
| 10.300 | 0 | 3 | 10 | 8  | 9  | 1  | 0 | 0 | 0 | <b>0.38</b> | 0.33 | 0.20      |     |
| 10.301 | 0 | 0 | 2  | 1  | 22 | 4  | 1 | 1 | 0 | <b>1.12</b> | 1.00 | 1.00      | n/a |
| 10.302 | 0 | 0 | 2  | 2  | 22 | 4  | 1 | 0 | 0 | <b>1.02</b> | 1.00 | 1.00      | n/a |
| 10.303 | 0 | 1 | 3  | 0  | 23 | 4  | 0 | 0 | 0 | <b>0.93</b> | 1.00 | 1.00      | n/a |
| 10.304 | 0 | 2 | 2  | 1  | 24 | 2  | 0 | 0 | 0 | <b>0.82</b> | 1.00 | 1.00      | n/a |
| 10.305 | 0 | 0 | 1  | 4  | 20 | 6  | 0 | 0 | 0 | <b>1.02</b> | 1.00 | 1.00      | n/a |
| 10.306 | 2 | 2 | 6  | 7  | 11 | 1  | 0 | 2 | 0 | <b>0.51</b> | 0.33 | 1.00      |     |
| 10.307 | 0 | 0 | 5  | 6  | 18 | 2  | 0 | 0 | 0 | <b>0.67</b> | 1.00 | 1.00      | n/a |
| 10.308 | 0 | 0 | 5  | 7  | 6  | 11 | 1 | 1 | 0 | <b>1.00</b> | 1.00 | 3.00      |     |
| 10.309 | 0 | 4 | 5  | 2  | 13 | 4  | 2 | 1 | 0 | <b>0.76</b> | 1.00 | 1.00      |     |
| 10.310 | 0 | 2 | 5  | 3  | 14 | 4  | 3 | 0 | 0 | <b>0.82</b> | 1.00 | 1.00      |     |
| 10.311 | 2 | 0 | 0  | 1  | 8  | 14 | 4 | 2 | 0 | <b>1.92</b> | 3.00 | 3.00      |     |

|        |   |   |   |   |    |    |    |   |   |             |      |           |     |
|--------|---|---|---|---|----|----|----|---|---|-------------|------|-----------|-----|
| 10.312 | 2 | 0 | 0 | 2 | 8  | 14 | 3  | 2 | 0 | <b>1.76</b> | 3.00 | 3.00      |     |
| 10.313 | 0 | 0 | 2 | 0 | 21 | 4  | 3  | 1 | 0 | <b>1.29</b> | 1.00 | 1.00      | n/a |
| 10.314 | 0 | 1 | 1 | 1 | 22 | 3  | 2  | 1 | 0 | <b>1.13</b> | 1.00 | 1.00      | n/a |
| 10.315 | 3 | 1 | 0 | 2 | 11 | 14 | 0  | 0 | 0 | <b>1.16</b> | 1.00 | 3.00      |     |
| 10.316 | 0 | 4 | 7 | 0 | 14 | 4  | 2  | 0 | 0 | <b>0.69</b> | 1.00 | 1.00      |     |
| 10.317 | 2 | 0 | 2 | 6 | 14 | 3  | 4  | 0 | 0 | <b>0.87</b> | 1.00 | 1.00      |     |
| 10.318 | 0 | 2 | 2 | 5 | 6  | 13 | 2  | 1 | 0 | <b>1.25</b> | 3.00 | 3.00      |     |
| 10.319 | 0 | 1 | 6 | 1 | 17 | 4  | 1  | 1 | 0 | <b>0.86</b> | 1.00 | 1.00      | n/a |
| 10.320 | 0 | 1 | 6 | 1 | 19 | 4  | 0  | 0 | 0 | <b>0.76</b> | 1.00 | 1.00      | n/a |
| 10.321 | 0 | 2 | 4 | 1 | 16 | 6  | 1  | 1 | 0 | <b>0.96</b> | 1.00 | 1.00      | n/a |
| 10.322 | 0 | 2 | 2 | 2 | 16 | 6  | 1  | 2 | 0 | <b>1.09</b> | 1.00 | 1.00      | n/a |
| 10.323 | 0 | 0 | 2 | 5 | 19 | 5  | 0  | 0 | 0 | <b>0.90</b> | 1.00 | 1.00      | n/a |
| 10.324 | 0 | 1 | 1 | 3 | 22 | 3  | 1  | 0 | 0 | <b>0.94</b> | 1.00 | 1.00      | n/a |
| 10.325 | 0 | 1 | 1 | 0 | 6  | 19 | 2  | 0 | 2 | <b>2.24</b> | 3.00 | 3.00      |     |
| 10.326 | 0 | 1 | 2 | 0 | 10 | 10 | 4  | 0 | 4 | <b>1.97</b> | 3.00 | 1.00/3.00 |     |
| 10.327 | 0 | 0 | 4 | 1 | 20 | 5  | 1  | 0 | 0 | <b>0.99</b> | 1.00 | 1.00      | n/a |
| 10.328 | 0 | 0 | 1 | 4 | 12 | 10 | 4  | 0 | 0 | <b>1.45</b> | 1.00 | 1.00      |     |
| 10.329 | 0 | 1 | 3 | 3 | 13 | 7  | 3  | 1 | 0 | <b>1.15</b> | 1.00 | 1.00      |     |
| 10.330 | 0 | 1 | 3 | 3 | 16 | 6  | 1  | 1 | 0 | <b>1.00</b> | 1.00 | 1.00      | n/a |
| 10.331 | 0 | 0 | 1 | 1 | 2  | 16 | 5  | 6 | 0 | <b>3.05</b> | 3.00 | 3.00      |     |
| 10.332 | 0 | 0 | 1 | 2 | 2  | 13 | 10 | 3 | 0 | <b>2.84</b> | 3.00 | 3.00      |     |
| 10.333 | 0 | 0 | 1 | 2 | 3  | 19 | 4  | 2 | 0 | <b>2.42</b> | 3.00 | 3.00      |     |
| 10.334 | 0 | 1 | 0 | 2 | 3  | 19 | 5  | 1 | 0 | <b>2.37</b> | 3.00 | 3.00      |     |
| 10.335 | 1 | 1 | 1 | 1 | 13 | 10 | 4  | 0 | 0 | <b>1.41</b> | 1.00 | 1.00      |     |
| 10.336 | 0 | 1 | 2 | 3 | 2  | 14 | 6  | 1 | 2 | <b>2.09</b> | 3.00 | 3.00      |     |
| 10.337 | 0 | 0 | 3 | 1 | 6  | 15 | 3  | 1 | 2 | <b>2.02</b> | 3.00 | 3.00      |     |
| 10.338 | 0 | 0 | 0 | 3 | 5  | 18 | 3  | 0 | 2 | <b>2.29</b> | 3.00 | 3.00      |     |
| 10.339 | 0 | 0 | 1 | 1 | 7  | 19 | 3  | 0 | 0 | <b>2.10</b> | 3.00 | 3.00      |     |
| 10.340 | 0 | 0 | 3 | 1 | 11 | 15 | 1  | 0 | 0 | <b>1.48</b> | 3.00 | 3.00      |     |
| 10.341 | 0 | 2 | 1 | 1 | 22 | 2  | 2  | 1 | 0 | <b>1.02</b> | 1.00 | 1.00      | n/a |
| 10.342 | 0 | 0 | 1 | 2 | 23 | 2  | 3  | 0 | 0 | <b>1.11</b> | 1.00 | 1.00      | n/a |
| 10.343 | 0 | 0 | 4 | 0 | 24 | 3  | 0  | 0 | 0 | <b>0.90</b> | 1.00 | 1.00      | n/a |
| 10.344 | 0 | 1 | 1 | 0 | 23 | 3  | 1  | 0 | 2 | <b>1.20</b> | 1.00 | 1.00      | n/a |
| 10.345 | 0 | 0 | 4 | 4 | 17 | 3  | 3  | 0 | 0 | <b>0.92</b> | 1.00 | 1.00      | n/a |
| 10.346 | 0 | 0 | 4 | 1 | 8  | 13 | 3  | 0 | 2 | <b>1.67</b> | 3.00 | 3.00      |     |
| 10.347 | 0 | 0 | 5 | 1 | 9  | 12 | 2  | 0 | 2 | <b>1.46</b> | 3.00 | 3.00      |     |
| 10.348 | 0 | 1 | 4 | 1 | 17 | 4  | 2  | 2 | 0 | <b>1.07</b> | 1.00 | 1.00      | n/a |
| 10.349 | 0 | 0 | 4 | 3 | 7  | 12 | 3  | 2 | 0 | <b>1.48</b> | 3.00 | 3.00      |     |
| 10.350 | 0 | 1 | 3 | 3 | 7  | 13 | 2  | 2 | 0 | <b>1.44</b> | 3.00 | 3.00      |     |
| 10.351 | 0 | 1 | 3 | 5 | 17 | 3  | 2  | 0 | 0 | <b>0.83</b> | 1.00 | 1.00      | n/a |
| 10.352 | 0 | 1 | 4 | 5 | 18 | 2  | 1  | 0 | 0 | <b>0.72</b> | 1.00 | 1.00      | n/a |
| 10.353 | 0 | 1 | 2 | 4 | 19 | 5  | 0  | 0 | 0 | <b>0.88</b> | 1.00 | 1.00      | n/a |
| 10.354 | 0 | 1 | 3 | 5 | 18 | 4  | 0  | 0 | 0 | <b>0.78</b> | 1.00 | 1.00      | n/a |
| 10.355 | 0 | 1 | 3 | 5 | 18 | 4  | 0  | 0 | 0 | <b>0.78</b> | 1.00 | 1.00      | n/a |
| 10.356 | 0 | 0 | 4 | 6 | 19 | 1  | 1  | 0 | 0 | <b>0.72</b> | 1.00 | 1.00      | n/a |
| 10.357 | 0 | 0 | 4 | 7 | 17 | 3  | 0  | 0 | 0 | <b>0.71</b> | 1.00 | 1.00      | n/a |
| 10.358 | 0 | 0 | 3 | 4 | 22 | 2  | 0  | 0 | 0 | <b>0.80</b> | 1.00 | 1.00      | n/a |
| 10.359 | 0 | 0 | 3 | 6 | 19 | 3  | 0  | 0 | 0 | <b>0.77</b> | 1.00 | 1.00      | n/a |
| 10.360 | 0 | 0 | 3 | 7 | 21 | 0  | 0  | 0 | 0 | <b>0.67</b> | 1.00 | 1.00      | n/a |
| 10.361 | 0 | 0 | 2 | 6 | 19 | 3  | 1  | 0 | 0 | <b>0.85</b> | 1.00 | 1.00      | n/a |
| 10.362 | 0 | 1 | 2 | 4 | 21 | 3  | 0  | 0 | 0 | <b>0.82</b> | 1.00 | 1.00      | n/a |
| 10.363 | 0 | 1 | 2 | 4 | 21 | 3  | 0  | 0 | 0 | <b>0.82</b> | 1.00 | 1.00      | n/a |
| 10.364 | 0 | 1 | 2 | 4 | 21 | 2  | 1  | 0 | 0 | <b>0.83</b> | 1.00 | 1.00      | n/a |
| 10.365 | 0 | 1 | 2 | 4 | 21 | 3  | 0  | 0 | 0 | <b>0.82</b> | 1.00 | 1.00      | n/a |
| 10.366 | 0 | 1 | 3 | 5 | 21 | 0  | 1  | 0 | 0 | <b>0.71</b> | 1.00 | 1.00      | n/a |
| 10.367 | 0 | 1 | 2 | 3 | 24 | 1  | 0  | 0 | 0 | <b>0.79</b> | 1.00 | 1.00      | n/a |
| 10.368 | 0 | 1 | 2 | 3 | 25 | 0  | 0  | 0 | 0 | <b>0.76</b> | 1.00 | 1.00      | n/a |
| 10.369 | 0 | 1 | 2 | 3 | 24 | 0  | 1  | 0 | 0 | <b>0.80</b> | 1.00 | 1.00      | n/a |
| 10.370 | 0 | 1 | 2 | 3 | 24 | 1  | 0  | 0 | 0 | <b>0.79</b> | 1.00 | 1.00      | n/a |
| 10.371 | 0 | 0 | 5 | 5 | 5  | 14 | 1  | 1 | 0 | <b>1.19</b> | 3.00 | 3.00      |     |



| 10.372       | 0                                | 0  | 6  | 3  | 3  | 13 | 6  | 0  | 0 | <b>1.43</b>    | 3.00   | 3.00        |  |  |
|--------------|----------------------------------|----|----|----|----|----|----|----|---|----------------|--------|-------------|--|--|
| 10.373       | 0                                | 1  | 5  | 3  | 3  | 16 | 3  | 0  | 0 | <b>1.34</b>    | 3.00   | 3.00        |  |  |
| 10.374       | 0                                | 1  | 3  | 3  | 8  | 15 | 1  | 0  | 0 | <b>1.30</b>    | 3.00   | 3.00        |  |  |
| 10.375       | 0                                | 1  | 3  | 4  | 7  | 16 | 0  | 0  | 0 | <b>1.23</b>    | 3.00   | 3.00        |  |  |
| Question no. | Frequency of the indicated value |    |    |    |    |    |    |    |   | Geometric mean | Median | Modal value |  |  |
| [-]          | -9                               | -7 | -5 | -3 | 1  | 2  | 3  | 4  | 5 | [-]            | [-]    | [-]         |  |  |
| 11.1         | 0                                | 0  | 0  | 0  | 0  | 0  | 13 | 15 | 3 | <b>3.62</b>    | 4.00   | 4.00        |  |  |
| 11.2         | 0                                | 0  | 0  | 0  | 0  | 3  | 10 | 14 | 4 | <b>3.51</b>    | 4.00   | 4.00        |  |  |
| 11.3         | 0                                | 0  | 0  | 0  | 4  | 8  | 13 | 4  | 2 | <b>2.52</b>    | 3.00   | 3.00        |  |  |
| 11.4         | 0                                | 0  | 0  | 0  | 0  | 3  | 9  | 18 | 1 | <b>3.47</b>    | 4.00   | 4.00        |  |  |
| 11.5         | 0                                | 0  | 0  | 0  | 0  | 0  | 13 | 18 | 0 | <b>3.55</b>    | 4.00   | 4.00        |  |  |
| 11.6         | 0                                | 0  | 0  | 0  | 0  | 1  | 12 | 17 | 1 | <b>3.52</b>    | 4.00   | 4.00        |  |  |
| Question no. | Frequency of the indicated value |    |    |    |    |    |    |    |   | Geometric mean | Median | Modal value |  |  |
| [-]          | -9                               | -7 | -5 | -3 | 1  | 2  | 3  | 4  | 5 | [-]            | [-]    | [-]         |  |  |
| 12.1         | 0                                | 0  | 0  | 0  | 0  | 0  | 0  | 0  | 0 | <b>n/a</b>     | n/a    | n/a         |  |  |
| 12.2         | 0                                | 0  | 0  | 0  | 0  | 0  | 0  | 0  | 0 | <b>n/a</b>     | n/a    | n/a         |  |  |
| 12.3         | 0                                | 0  | 0  | 0  | 0  | 0  | 0  | 0  | 0 | <b>n/a</b>     | n/a    | n/a         |  |  |
| 12.4         | 0                                | 0  | 0  | 0  | 17 | 0  | 0  | 0  | 0 | <b>1.00</b>    | 1.00   | 1.00        |  |  |
| 12.5         | 0                                | 0  | 0  | 0  | 13 | 0  | 0  | 0  | 0 | <b>1.00</b>    | 1.00   | 1.00        |  |  |
| 12.6         | 0                                | 0  | 0  | 0  | 0  | 0  | 0  | 0  | 0 | <b>n/a</b>     | n/a    | n/a         |  |  |
| 12.7         | 0                                | 0  | 0  | 0  | 0  | 0  | 0  | 0  | 0 | <b>n/a</b>     | n/a    | n/a         |  |  |
| 12.8         | 0                                | 0  | 0  | 0  | 5  | 0  | 0  | 0  | 0 | <b>1.00</b>    | 1.00   | 1.00        |  |  |
| 12.9         | 0                                | 0  | 0  | 0  | 5  | 0  | 0  | 0  | 0 | <b>1.00</b>    | 1.00   | 1.00        |  |  |
| 12.10        | 0                                | 0  | 0  | 0  | 5  | 0  | 0  | 0  | 0 | <b>1.00</b>    | 1.00   | 1.00        |  |  |
| 12.11        | 0                                | 0  | 0  | 0  | 5  | 0  | 0  | 0  | 0 | <b>1.00</b>    | 1.00   | 1.00        |  |  |
| 12.12        | 0                                | 0  | 0  | 0  | 11 | 0  | 0  | 0  | 0 | <b>1.00</b>    | 1.00   | 1.00        |  |  |
| 12.13        | 0                                | 0  | 0  | 0  | 2  | 0  | 0  | 0  | 0 | <b>1.00</b>    | 1.00   | 1.00        |  |  |
| 12.14        | 0                                | 0  | 0  | 0  | 5  | 0  | 0  | 0  | 0 | <b>1.00</b>    | 1.00   | 1.00        |  |  |
| 12.15        | 0                                | 0  | 0  | 0  | 5  | 0  | 0  | 0  | 0 | <b>1.00</b>    | 1.00   | 1.00        |  |  |
| 12.16        | 0                                | 0  | 0  | 0  | 19 | 0  | 0  | 0  | 0 | <b>1.00</b>    | 1.00   | 1.00        |  |  |
| 12.17        | 0                                | 0  | 0  | 0  | 0  | 0  | 0  | 0  | 0 | <b>n/a</b>     | n/a    | n/a         |  |  |
| 12.18        | 0                                | 0  | 0  | 0  | 0  | 0  | 0  | 0  | 0 | <b>n/a</b>     | n/a    | n/a         |  |  |
| 13.1         | 0                                | 0  | 0  | 0  | 0  | 0  | 0  | 0  | 0 | <b>n/a</b>     | n/a    | n/a         |  |  |
| 13.2         | 0                                | 0  | 0  | 0  | 0  | 0  | 0  | 0  | 0 | <b>n/a</b>     | n/a    | n/a         |  |  |
| 13.3         | 0                                | 0  | 0  | 0  | 4  | 0  | 0  | 0  | 0 | <b>1.00</b>    | 1.00   | 1.00        |  |  |
| 13.4         | 0                                | 0  | 0  | 0  | 5  | 0  | 0  | 0  | 0 | <b>1.00</b>    | 1.00   | 1.00        |  |  |
| 13.5         | 0                                | 0  | 0  | 0  | 8  | 0  | 0  | 0  | 0 | <b>1.00</b>    | 1.00   | 1.00        |  |  |
| 13.6         | 0                                | 0  | 0  | 0  | 14 | 0  | 0  | 0  | 0 | <b>1.00</b>    | 1.00   | 1.00        |  |  |
